# Supplementary material for: Measuring health literacy combining performance-based and self-assessed measures: the roles of age, educational level and financial resources in predicting health literacy skills. A cross-sectional study conducted in Florence (Italy)
Source: PubMed Central journal article supplement — BMJ Open. 2020 Oct 5;10(10):e035987. doi: 10.1136/bmjopen-2019-035987 (PMC7537461; doi:10.1136/bmjopen-2019-035987), 2020-10-05
Supplement: bmjopen-2019-035987.draft_revisions.pdf [file bmjopen-2019-035987.draft_revisions.pdf]

# BMJ Open

BMJ Open is committed to open peer review. As part of this commitment we make the peer review history of every article we publish publicly available.

When an article is published we post the peer reviewers' comments and the authors' responses online. We also post the versions of the paper that were used during peer review. These are the versions that the peer review comments apply to.

The versions of the paper that follow are the versions that were submitted during the peer review process. They are not the versions of record or the final published versions. They should not be cited or distributed as the published version of this manuscript.

BMJ Open is an open access journal and the full, final, typeset and author-corrected version of record of the manuscript is available on our site with no access controls, subscription charges or pay-per-view fees (<http://bmjopen.bmj.com>).

If you have any questions on BMJ Open's open peer review process please email [info.bmjopen@bmj.com](mailto:info.bmjopen@bmj.com)

# BMJ Open

**Measuring health literacy combining performance-based  
and perception-based measures.  
The role of age, educational level and financial resources in  
predicting health literacy skills**

|                               |                                                                                                                                                                                                                                                                                                                                                                                                                     |
|-------------------------------|---------------------------------------------------------------------------------------------------------------------------------------------------------------------------------------------------------------------------------------------------------------------------------------------------------------------------------------------------------------------------------------------------------------------|
| Journal:                      | <i>BMJ Open</i>                                                                                                                                                                                                                                                                                                                                                                                                     |
| Manuscript ID                 | bmjopen-2019-035987                                                                                                                                                                                                                                                                                                                                                                                                 |
| Article Type:                 | Original research                                                                                                                                                                                                                                                                                                                                                                                                   |
| Date Submitted by the Author: | 25-Nov-2019                                                                                                                                                                                                                                                                                                                                                                                                         |
| Complete List of Authors:     | Lorini, Chiara; University of Florence, Department of Health Sciences<br>Lastrucci, Vieri; University of Florence, Department of Health Sciences<br>Paolini, Diana; University of Florence, Department of Health Sciences<br>Research Group, Florence Health Literacy ; University of Florence,<br>Department of Health Sciences<br>Bonaccorsi, Guglielmo; University of Florence, Department of Health<br>Sciences |
| Keywords:                     | PUBLIC HEALTH, PREVENTIVE MEDICINE, STATISTICS & RESEARCH<br>METHODS                                                                                                                                                                                                                                                                                                                                                |
|                               |                                                                                                                                                                                                                                                                                                                                                                                                                     |

SCHOLARONE™  
Manuscripts

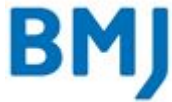

I, the Submitting Author has the right to grant and does grant on behalf of all authors of the Work (as defined in the below author licence), an exclusive licence and/or a non-exclusive licence for contributions from authors who are: i) UK Crown employees; ii) where BMJ has agreed a CC-BY licence shall apply, and/or iii) in accordance with the terms applicable for US Federal Government officers or employees acting as part of their official duties; on a worldwide, perpetual, irrevocable, royalty-free basis to BMJ Publishing Group Ltd ("BMJ") its licensees and where the relevant Journal is co-owned by BMJ to the co-owners of the Journal, to publish the Work in this journal and any other BMJ products and to exploit all rights, as set out in our [licence](#).

The Submitting Author accepts and understands that any supply made under these terms is made by BMJ to the Submitting Author unless you are acting as an employee on behalf of your employer or a postgraduate student of an affiliated institution which is paying any applicable article publishing charge ("APC") for Open Access articles. Where the Submitting Author wishes to make the Work available on an Open Access basis (and intends to pay the relevant APC), the terms of reuse of such Open Access shall be governed by a Creative Commons licence – details of these licences and which [Creative Commons](#) licence will apply to this Work are set out in our licence referred to above.

Other than as permitted in any relevant BMJ Author's Self Archiving Policies, I confirm this Work has not been accepted for publication elsewhere, is not being considered for publication elsewhere and does not duplicate material already published. I confirm all authors consent to publication of this Work and authorise the granting of this licence.

## Measuring health literacy combining performance-based and perception-based measures.

### The role of age, educational level and financial resources in predicting health literacy skills

Chiara Lorini<sup>1</sup>, Vieri Lastrucci<sup>1\*</sup>, Diana Paolini<sup>1</sup>, Florence Health Literacy Research Group<sup>^</sup>, Guglielmo Bonaccorsi<sup>1</sup>

<sup>^</sup>Florence Health Literacy Research Group: Elisabetta Alti<sup>3</sup>, Sergio Baglioni<sup>3</sup>, Angela Bechini<sup>1</sup>, Leonardo Bellino<sup>3</sup>, Niccolò Berzi<sup>3</sup>, Jacopo Bianchi<sup>4</sup>, Sara Boccalini<sup>1</sup>, Guglielmo Bonaccorsi<sup>1</sup>, Giuseppe Burgio<sup>3</sup>, Alessandro Bussotti<sup>5</sup>, Marco Del Riccio<sup>1</sup>, Martina Donzellini<sup>4</sup>, Angela Galdiero<sup>6</sup>, Alessandro Grassi<sup>3</sup>, Tommaso Grassi<sup>4</sup>, Vieri Lastrucci<sup>1</sup>, Arrigo Lombardi<sup>3</sup>, Chiara Lorini<sup>1</sup>, Sarah Mantwill<sup>2</sup>, Federico Manzi<sup>4</sup>, Alessandro Mereu<sup>3</sup>, Donatella Messina<sup>3</sup>, Chiara Milani<sup>4</sup>, Diana Paolini<sup>1</sup>, Marco Targonato<sup>3</sup>, Marco Toccafondi<sup>3</sup>, Gino Sartor<sup>4</sup>, Virginia Vettori<sup>1</sup>

1. Department of Health Science, University of Florence, Florence, Italy

2. Department of Health Sciences & Health Policy, University of Lucerne, Lucerne, Switzerland

3. General Practitioner, Local Health Unit - Toscana Centro, Italy

4. School of Specialization in Hygiene and Preventive Medicine, University of Florence, Florence, Italy

5. Careggi University Hospital, Florence, Italy

6. Local Health Unit - Toscana Centro, Italy

\*Corresponding author:

Vieri Lastrucci; e-mail: [vieri.lastrucci@gmail.it](mailto:vieri.lastrucci@gmail.it); Postal address: Viale Morgagni, 48, 50134 Firenze, Italy

## Abstract

### *Objective*

To compare the results of self-performed based and perception-based measures of health literacy (HL) and to evaluate the contribution of their joint use in assessing some HL antecedents.

### *Design*

Cross-sectional study

### *Setting*

General population

### *Participants*

This study is part of a larger one, where participants were randomly selected from the registries of eleven general practitioners (GPs) working in the municipality of Florence. Inclusion criteria were the following: 18-69 years of age and Italian speaking. Exclusion criteria included cognitive impairment, severe psychiatric diseases and end-stage diseases. In this paper, 220 adults (i.e. only the arm B of the larger study) were included.

### *Outcome measures*

HL was measured using the European Health Literacy Survey Questionnaire (HLS-EU-Q16) and the Newest Vital Sign (NVS). The HL levels obtained by means of the two measurement tools were combined into a new variable, that described three different levels of HL skills: low HL skills; partial HL skills; high HL skills. Multivariate ordinal logistic regression analysis was performed to assess the predictive role of age class, educational level and financial resources with respect to HL skills.

### *Results*

Twenty-two percent of the sample had high HL skills, 28.3% low HL skills, and 49.5% partial HL skills. Educational level, age class and financial resources were significantly associated with the HL skills, with OR values higher than those obtained using the NVS or the HLS-EU-Q16 individually.

### *Conclusion*

1  
2  
3 The combination of the results obtained using the NVS and the HLS-EU-Q16 improve the understanding of  
4  
5 HL. The new variable generated by this combination could be considered a different way to assess HL and  
6  
7 its multidimensional contents.  
8  
9

10  
11  
12 **Trial registration number** CEAVC:10113.  
13  
14

### 15 16 17 **Strengths and limitations of this study** 18 19

- 20  
21  
22 • The population-based sample was obtained with a combination of convenience and probability  
23  
24 sampling procedures.  
25
- 26  
27 • In this study, for the first time, two different measures of health literacy (HL), namely the NVS for  
28  
29 functional HL and the HLS-EU-Q16 for general HL, were combined into a new variable  
30
- 31  
32 • The new variable, called “HL skills”, describes three possible conditions: “low HL skills” (low  
33  
34 functional and general HL); “partial HL skills” (low functional and general HL); “high HL skills” (high  
35  
36 functional and general HL)  
37
- 38  
39 • The new variable was entered as outcome variable in a multivariate logistic regression analysis,  
40  
41 considering age, educational level and financial resources as predictors  
42  
43  
44  
45  
46  
47  
48  
49  
50  
51  
52  
53  
54  
55  
56  
57  
58  
59  
60

## Introduction

Health literacy (HL) is a multidimensional concept<sup>1</sup> and deal with broader competences that are needed to communicate, navigate and actively participate within modern health care systems and, more generally, with individual's capacity to assess, understand and use health information in different settings<sup>2,3</sup>. The skills that compose HL can be classified in three different dimensions: the practical application of literacy skills ranging from those needed to be able to function effectively in everyday situations (functional); the cognitive and literacy skills which can be used to actively participate in everyday activities and to apply new information to changing circumstances (interactive); the cognitive skills which can be applied to critically analyse information, and to use this information to exert greater control over life events and situations (critical literacy)<sup>4</sup>. All these competences enable a person to navigate within three domains: healthcare, disease prevention and health promotion<sup>2</sup>. For these reasons, HL affects people's health and it is now considered as one of the main determinants of health inequalities; it is significantly related with age, educational level and economic status<sup>5-8</sup>, and is supposed to partially mediate the effect of socioeconomic status on health-related outcomes<sup>9,10</sup>.

To date several different definitions of HL have been proposed in the literature; as a result, a considerable number of measurement tools of HL have been developed by now. This variety of measurement tools rouses debate and poses some challenges. Indeed, more than 150 measures exist but no "gold standard" measure has never emerged till now; furthermore, only a small number of instruments examines multiple domains of HL (functional, interactive and critical), while the majority deals solely with the functional component, with the risk of fragmentation. On top of that, measurement tools may be classified as either performance-based (objective) or perception-based (subjective), so that they capture different aspects, for example the objective ability to understand medical information *versus* the effect of emotional or motivational aspects on decision-making process<sup>11-14</sup>. As a consequence of the lack of a comprehensive approach to HL measurement, the use of different or fragmented HL measures led to difficulties in

1  
2  
3 comparing and/or to incomplete results in terms of HL levels and related outcomes, as well as to an  
4  
5 increasing risk of misinterpretations of the effectiveness of the interventions aimed at improving HL<sup>15-20</sup>.

6  
7 For these reasons, many Authors suggest measuring HL using different instrument at the same time, so as  
8  
9 to assess different skills, abilities and competences that constitute such a multidimensional construct<sup>11,21</sup>.  
10  
11 Nevertheless, researches simultaneously using performance-based (*i.e.* direct testing of competences) and  
12  
13 perception-based (*i.e.* self-reported abilities) measures of different domains of HL remain scarce, and their  
14  
15 results are usually focused on highlighting the inconsistencies between the two types of tests, without  
16  
17 assessing their potential joint contribution to measuring HL as a unique concept<sup>15,22-24</sup>.

18  
19 Waters et al.<sup>25</sup>, in a study conducted on patients affected by diabetes or colon cancer, found that  
20  
21 performance-based and perception-based HL measures represent related but independent constructs;  
22  
23 moreover, they are able to predict the objective disease knowledge - but not the perceived disease  
24  
25 knowledge - in the same way. Due to these results, the Author concluded that performance-based and  
26  
27 perception-based measures of HL are not interchangeable, although they tend to be consistent in  
28  
29 categorizing patients into different levels of HL<sup>25</sup>. To the best of our knowledge, no studies adopting a  
30  
31 similar approach to the analysis of the HL determinants have been published by now.  
32  
33  
34  
35  
36  
37  
38

39 The aim of this study is to compare the results of self-performed based and perception-based measures of  
40  
41 HL and to evaluate the potential contribution of their joint use in assessing some HL antecedents (age and  
42  
43 socio-economical determinants) in a population-based sample. We believe this is the first attempt to use  
44  
45 the information obtained with different HL measurement tools to get further insight into the knowledge of  
46  
47 the antecedents of HL.  
48  
49  
50  
51

## 52 **Methods**

53  
54  
55

56 This study is part of a larger one, conducted in a population-based sample in Florence, Italy, with the aim of  
57  
58 measuring HL level and to validate some HL measurement tools. The study design is described elsewhere<sup>26</sup>,  
59  
60 as well as some of its results<sup>7,27</sup>.



### *Data collection*

The study adopted a cross-sectional design that was carried out in a population-based sample. Participants were randomly selected from the registries of eleven general practitioners (GPs) working in the municipality of Florence. The GPs were recruited using convenience criteria: according to the study protocol, the first eight who voluntarily join the study were included and were asked to randomly select 80 subjects among those registered as one of his/her patients. Since oversampling was not enough to reach the sample size of 480, three more GPs were included, with a second random sample for the first eight.

Inclusion criteria were the following: 18–69 years of age, and Italian speaking (since the survey was conducted in Italian). Exclusion criteria included cognitive impairment, severe psychiatric diseases and end-stage diseases. Each GP verified the inclusion and exclusion criteria when selecting the sample.

Each subject was randomly allocated to one of the two arms of the research project (A and B), according to the questionnaires used during the interview (type I and type II questionnaires, respectively). To meet the specific aims of the present study, only the B arm of the research was considered, since only in this arm the short form (16 items) of the European Health Literacy Survey Questionnaire (HLS-EU-Q16) was administered, together with the Italian version of the Newest Vital Sign (NVS-IT, hereinafter NVS). Overall, 984 subjects were selected (492 in the B arm of the study).

Data collection started in February 2017 and finished on 31<sup>st</sup> December 2017. Each selected subject was contacted via postal mail. Subjects received an information sheet signed by the GP and the person in charge of the study, which included a short description of the study, an invitation to participate, and a consent form. Participants were asked to sign the consent form and return it via mail to the researchers in charge. The mail also contained the nutritional label of the NVS. After receipt of the signed consent forms, the subjects were contacted for the computer-assisted telephone interview. Nine interviewers made the phone calls. Written instructions on how to conduct the interview were drawn up and shared to standardize the procedure and limit interviewer bias. Each subject was randomly assigned to one of the nine interviewers and contacted a maximum of six times before being considered unreachable.

1  
2  
3 The questionnaire had a general section that includes questions on sociodemographic, familial data  
4 (antecedents), and health-related outcomes (consequences), as described in the previous papers<sup>7,26</sup>. In  
5  
6  
7 addition, the questionnaire included the NVS and the HLS-EU-Q16.

8  
9 Age was collected as continuous variable, then grouped into four classes (18-45; 46-55; 56-65; >65 years  
10  
11 old). Educational level was classified into three levels (less than high school diploma; high school degree;  
12  
13 bachelor's degree and higher) while the financial status was investigated by the item "is your income  
14  
15 adequate to meet monthly living expenses?" with four possible response options (not enough; barely  
16  
17 enough; enough; more than enough).  
18  
19

### 20 21 22 23 *HL measures*

24  
25 HL was measured using the NVS and the HLS-EU-Q16.

26  
27 The Italian version of the NVS was validated by Capecchi et al. from the UK version form<sup>28</sup>, then it was  
28  
29 applied in many different contexts<sup>29,30</sup>. It consists of an ice cream nutrition label, with seven associated  
30  
31 questions that measure functional health literacy (prose and numeracy). It produces a final score ranging  
32  
33 from 0 to 6, allowing participants to be classified into three categories—high likelihood of limited HL (score:  
34  
35 0–1), possibility of limited HL (score: 2–3) and adequate HL (score: 4–6). NVS data related to the entire  
36  
37 sample of this study (A and B arms) have been described elsewhere<sup>7</sup>.  
38  
39

40  
41 The European Health Literacy Survey was the first, large population study aimed at generating first-time  
42  
43 data on HL across diverse populations in the European Union<sup>31</sup>. To achieve this purpose, the European  
44  
45 Health Literacy Survey Questionnaire (HLS-EU-Q) for measuring HL was developed<sup>32</sup> on the basis of the  
46  
47 recommendations of Pleasant et al.<sup>20</sup> regarding the characteristics that a comprehensive measure of HL  
48  
49 should have. In particular, starting from the HLS-EU Consortium conceptual framework of HL<sup>2</sup>, the HLS-EU-  
50  
51 Q assesses the processes of accessing, understanding appraising and applying health-related information  
52  
53 within the three domains of health: healthcare, disease prevention and health promotion. It measures self-  
54  
55 perceived functional, critical and interactive HL (*i.e.* general HL). The original full version of the HLS-EU-Q is  
56  
57 constituted by 47 items (HLS-EU-Q47), and the HLS-EU-Q16 represents its short version that was developed  
58  
59 by selecting 16 items<sup>24</sup>. The HLS-EU-Q16 has Likert-type responses ("very easy", "fairly easy", "fairly  
60

1  
2  
3 difficult", "very difficult") and an associated final score that measures interaction, comprehension,  
4 information seeking, application/function, decision-making/critical thinking, evaluation, responsibility,  
5 confidence, and navigation skills. To generate the score of the HLS-EU-Q16, the items are dichotomized into  
6 two categories with two scores, "easy" ("fairly" or "very" easy = 1) and "difficult" ("fairly" and "very"  
7 difficult = 0). "Don't know/refusal" answer was recoded as missing. The scale score is calculated as the sum  
8 of the scores of each item and varied between 0 and 16. As suggested by other studies<sup>23,33</sup>, only  
9 respondents who gave an answer to at least 14 items were considered. Three levels of HL were defined  
10 considering the HLS-EU-Q16 score: inadequate HL (0-8), problematic HL (9-12) and sufficient HL (13-16). As  
11 previously described, the Italian version of the HLS-EU-Q16 was validated in this study<sup>27</sup>.

### 22 23 24 25 *Statistical analysis*

26 Fisher exact test was used to evaluate associations between categorical variables.

27  
28 Multivariate ordinal logistic regression analysis was performed to assess the predictive role, expressed by  
29 Odds Ratio (OR), of age class, educational level and financial resources with respect to HL skills, measured  
30 combining the results obtained using the two tests (HLS-EU-Q16 and NVS). In particular, the dependent –  
31 ordinal - variable had three levels:

- 32 1) "low HL skills" level that comprises high likelihood or possibility of limited HL measured by NVS and  
33 inadequate or problematic HL measured by HLS-EU-Q16;
- 34 2) "partial HL skills" level that comprises high likelihood or possibility of limited HL measured by NVS  
35 and sufficient HL measured by HLS-EU-Q16 or, conversely, adequate HL measured by NVS and  
36 inadequate or problematic HL according to HLS-EU-Q16;
- 37 3) "high HL skills" level that comprises adequate HL measured by NVS and sufficient HL measured by  
38 HLS-EU-Q16.

39  
40 The OR obtained from this model was a measure of the change in the odds from lower to higher levels, *i.e.*  
41 from lower to higher HL skills. For comparison, the same multivariate ordinal logistic regression analysis  
42 was applied considering, as dependent –ordinal- variable, the level of HL measured by each single HL tests  
43 (*i.e.* NVS and HLS-EU-Q16). Specifically, two models were developed: in the first one, the NVS level was the

1  
2  
3 dependent variable (1-high likelihood of limited HL; 2-possibility of limited HL; 3-adequate HL), while in the  
4  
5 second one the HLS-EU-Q16 level was the dependent variable (1- inadequate HL; problematic HL; 3-  
6  
7 sufficient HL).  
8

9  
10 Statistical analyses were conducted using Stata version 15 (Stata Corp, College Station, TX). All tests were  
11  
12 two-sided, and p-values were considered as statistically significant when below 0.05.  
13  
14  
15

### 16 *Patient and public involvement*

17  
18 The study population was not directly involved in the design, recruitment and conduct of this study.  
19  
20 However, the Florence Health Literacy Research Group involved representatives from Provincial Medical  
21  
22 Council, Local Health Unit and University Hospital of Florence. All of these representatives were involved in  
23  
24 the study design and questionnaire development and will disseminate the results from this work.  
25  
26  
27  
28  
29

### 30 **Results**

31  
32  
33  
34 A total of 452 subjects were interviewed (compliance equal to 46.1%) considering both arms of the  
35  
36 research project. The refusal rate was 15.6% of the invited people, while 38.2% of the invited people did  
37  
38 not respond to any contact attempts and was considered unreachable.  
39

40  
41 Two-hundred twelve subjects (58% females; mean age: 53.6 ±11.9 years) were interviewed in the B arm of  
42  
43 the study and the score for both HL measures was obtained. The majority of them (96.7%) were Italian,  
44  
45 with high school (36.3%) or university (45.3%) degree and had enough or more than enough financial  
46  
47 resources at disposal from own or family income to get to the end of the month (68.3%) (Table 1).  
48

49  
50 According to the HLS-EU-Q16, 11.8% had inadequate, 55.2% problematic and 33% sufficient HL; considering  
51  
52 the NVS, 10.4% had high likelihood of limited HL, 28.8% possibility of limited HL, 60.8% adequate HL (Table  
53  
54 1).  
55

56  
57 As for NVS, the HL levels was significantly ( $p<0.05$ ) associated with age class, educational level and financial  
58  
59 resources, while when measured by HLS-EU-Q16 the HL levels were significantly ( $p<0.05$ ) associated only  
60  
with education. The percentage of people with low HL was higher when it was measured by HLS-EU-Q16

1  
2  
3 than for NVS in each category of age class, educational level, and financial resources (Figure 1). For both  
4  
5 measures, the percentage of people with low HL increased with age and became more similar in older  
6  
7 people: for HLS-EU-Q16, from 59.2% for 18-45 to 78.4% for >65 years old; for NVS, from 20% for 18-45 to  
8  
9 67.5% for >65 years old. Similar results were observed for educational level and financial resources: for  
10  
11 both tests, the percentage of people with low HL increased with the decrease of educational level or  
12  
13 financial resources; in the lowest sub-categories (*i.e.* less than high school diploma or having not enough  
14  
15 financial resources), the percentage of people with low HL became similar between the two tests.  
16  
17

18  
19 Combining the classification of both tests (Table 2), 22% of the sample had adequate level of functional  
20  
21 (measured by NVS) and sufficient general HL (measured by HLS-EU-Q16). On the other hand, 28.3%  
22  
23 presented both low functional HL (high likelihood or possibility of limited HL measured by NVS) and low  
24  
25 general HL (inadequate or problematic HL according to HLS-EU-Q16). However, the greater part of the  
26  
27 sample (49.5%) presented inconsistent HL measurements with low functional HL and sufficient general HL  
28  
29 or vice versa. In particular, the percentage of participants with adequate functional HL and low general HL  
30  
31 (38.7%) was higher than the percentage of participants with low functional HL and sufficient general HL  
32  
33 (10.8%).  
34  
35

36  
37 The classification of the subjects into four HL groups (combining the two HL measures) was significantly  
38  
39 associated with age class, educational level, and financial resources (Figure 2). With the increasing of age,  
40  
41 the percentage of people with adequate HL for NVS and sufficient HL for HLS-EU-Q16 decreases: it was  
42  
43 similar between the 18-45 and 46-55 years old groups (about 30%), it halved in the 56-65 years old group,  
44  
45 and it halved again in the over 65 years old group. A similar tendency, although less markedly evident, was  
46  
47 observed for those with sufficient HL for HLS-EU-Q16 and low HL for NVS. At the same time, the percentage  
48  
49 of subjects with low HL for both tests increased with increasing age, ranging from 12.2% in the youngest  
50  
51 age group to 54.1% in the oldest age group. For what concern education, with the increasing of the  
52  
53 education level there was a decreasing of the percentage of people with low HL in both tests. The highest  
54  
55 percentage of subjects with adequate HL at NVS and sufficient HL at HLS-EU-Q16 was in the bachelor's  
56  
57 degree and higher group (35.4%), while the lowest percentage was registered in the high school degree  
58  
59 group (10.4%); the latter education group also presents the lowest percentage of people with sufficient HL  
60

1  
2  
3 at HLS-EU-Q16 and low HL at NVS (9.1%) and the highest percentage of those with low HL at HLS-EU-Q16  
4 and adequate HL at NVS (46.8%). Moreover, with the increase of the availability of financial resources it  
5 increased the percentage of people with adequate HL at NVS and sufficient HL at HLS-EU-Q16 and, at the  
6 same time, it decreased the percentage of people with low HL at both tests; in particular, the percentage of  
7 people with low HL at both tests halved moving from the category “not enough” to “barely enough” (from  
8 70% to 32.1%). Finally, in the more “disadvantages” groups (elderly people, low educational level, not  
9 enough availability of financial resources), the percentage of people with discordant results regarding HL  
10 level (i.e. low functional HL and sufficient general HL or vice versa) was lower than those obtained in the  
11 other groups.  
12  
13  
14  
15  
16  
17  
18  
19  
20  
21  
22

23 Educational level, age class and financial resources were entered as covariates in a multivariate ordinal  
24 regression model, considering the HL skills (“low HL skills”, “partial HL skills”, “high HL skills”, according to  
25 the combination of the classification obtained using the NVS and the HLS-EU-Q16) as outcome variable. All  
26 the categories of the covariates showed significant associations with the outcome, with the exception of  
27 “high school degree”, with an evident trend. Moreover, OR values were greater than 3 in most of the cases  
28 (Table 3). In particular, the odds of having high HL skills were higher with the decreasing of age, the  
29 increasing of financial resources, and for those who have bachelor’s degree and higher. Table 4 reported  
30 the results of the same analyses conducted considering as dependent variable the level of HL according to  
31 the NVS (I model) and to the HLS-EU-Q16 (II model). Considering the first model, functional HL significantly  
32 increased with the decreasing of age and for people with bachelor’s degree and higher, while financial  
33 resources did not show a predictive role. As regards to the second model, age class, educational level and  
34 financial resources were not significantly associated with general HL.  
35  
36  
37  
38  
39  
40  
41  
42  
43  
44  
45  
46  
47  
48  
49  
50  
51

## 52 Discussion

53  
54  
55

56 The aim of the study was to compare two different measures of HL and to evaluate the potential  
57 contribution of their joint use in assessing HL antecedents in a population-based sample. Our results  
58 showed that NVS and HLS-EU-Q16 led to results that are not completely overlapped as a relevant  
59  
60

1  
2  
3 proportion of the population presented different HL levels when measured with different tools.  
4  
5 Furthermore, the antecedents of HL investigated in this study have a different weight in predicting NVS or  
6  
7 HLS-EU-Q16 results. These results indicate that they measure different aspects of HL; these findings are in  
8  
9 line with other studies conducted in other Countries<sup>22,34</sup>.

10  
11 A possible explanation for these findings may lay in the nature itself of the two HL measurement tool as the  
12  
13 HLS-EU-Q16 is a self-reported measure for general HL, while NVS is a performance-based measure of  
14  
15 reading, understanding and numeracy skills. In fact, what people think they know does not always  
16  
17 correspond to what they actually know: people tend to be overconfident (they think they know more than  
18  
19 they actually do) or underconfident (they think they know less than they actually do). Overconfidence and  
20  
21 underconfidence are a consequence of the matching between knowledge, confidence, self-efficacy, and  
22  
23 emotional distress<sup>35-38</sup>, and they may differ from country to country as they are also influenced by cultural  
24  
25 factors<sup>39,40</sup>.

26  
27  
28  
29  
30 On the other hand, high skills in reading and understanding health related information (functional HL), do  
31  
32 not necessarily imply high critical and interactive competencies (included in general HL), that are related  
33  
34 also with problem-solving skills, life experiences, and empowerment<sup>41,42</sup>. The simultaneous use of the two  
35  
36 HL measures has highlighted the presence of three well distinct HL groups in the population. A first group is  
37  
38 represented by the participants that had adequate level of functional and sufficient general HL: this group  
39  
40 have a broader range of HL skills (high HL skills), that can be used to participate actively in everyday  
41  
42 situations, extract health information and derive meaning from different forms of health communication,  
43  
44 applying this to changing circumstances, exert control over their care, and so on<sup>43,44</sup>. A second group is  
45  
46 represented by the participants that presented both low functional HL and low general HL: these subjects  
47  
48 are lacking in a wide range of HL skills (low HL skills). Lastly, between these two opposite conditions, a third  
49  
50 group (partial HL skills) is represented by about half of the sample and includes all the participants that  
51  
52 presented inconsistent HL measurements with low functional HL and sufficient general HL or *vice versa*;  
53  
54 these people have some HL skills, but lack others.

55  
56  
57  
58  
59 As far as the demographic and socio-economic characteristics of the HL groups defined by the two HL  
60  
measures are concerned, it is interestingly to note that the more vulnerable population groups (the older,

1  
2  
3 less educated and poorer) presented the lower level of discrepancies in the results obtained with the two  
4  
5 HL tools, and in most of the cases, these groups presented low HL level in both the measures. On the  
6  
7 contrary, the youngest (18-45 years), those with high school degree and those with enough financial  
8  
9 resources presented the highest percentage of people with partial HL skills - low functional HL and  
10  
11 sufficient general HL in most of the cases.  
12  
13

14 As regard to the combination of the results obtained applying the two HL measures into a new variable –  
15  
16 *i.e.* HL skills, findings showed that the new variable strengthens the association between HL and the  
17  
18 investigated antecedents. Indeed, the comparison of the three models of multivariate ordinal logistic  
19  
20 regression showed that age, educational level and financial resources significantly and independently  
21  
22 predict HL skills with OR values generally higher than those observed in the models that consider each  
23  
24 single HL measure. These results suggest that a broader evaluation of HL dimensions - obtained integrating  
25  
26 the NVS and the HLS-EU-Q16 data - could better represent the real meaning of the complex and hard-to-  
27  
28 measure concept of HL. However, further researches are needed to confirm these results and to evaluate  
29  
30 whether this approach will also better predict the association between HL and health-related outcomes.  
31  
32

33  
34 Moreover - as widely described for diagnostic and screening tests<sup>45</sup> - the use of parallel tests (*i.e.* two tests  
35  
36 performed at the same time and the results subsequently combined) results in an increase in sensitivity,  
37  
38 namely, in this case, the identification of people with low HL skills. For these reasons, the integrations of  
39  
40 different HL measures using an approach similar to the one used in this study may help to widen the  
41  
42 narrow view resulting from the use of a single measure and may serve as the basis for the design of a more  
43  
44 comprehensive measurement tool of HL. In this regard, it should be underlined that the approach of  
45  
46 integrating different HL measures is in line to what has been suggested by Pleasant et al.<sup>20</sup> for the definition  
47  
48 of comprehensive measure of HL: multi-dimensional in content and methodology.  
49  
50  
51

52  
53  
54 This study has several limitations extensively discussed elsewhere<sup>7</sup>. One of the main limitations is that data  
55  
56 cannot be considered representative of the overall Italian or Florentine adult population since the  
57  
58 population-based sample was obtained with a combination of convenience and probability sampling  
59  
60 procedures. Although participants were randomly selected from the registers of the GPs, the GPs were



1  
2  
3 selected using convenience criteria, which may have introduced a selection bias. Moreover, results may  
4  
5 have been influenced by a non-response bias. Particularly, many enrolled people presented a high socio-  
6  
7 economic level (45.3% had bachelor's degree or higher and 17.4% more than enough financial resources).  
8  
9 These limits could influence external comparison of the study results (generalizability).  
10  
11  
12  
13

## 14 **Conclusion**

15  
16  
17  
18 In conclusion, our findings suggest that the combination of the results obtained using a performance-based  
19  
20 measure of functional HL (the NVS) and a self-performed measure of general HL (HLS-EU-Q16) may improve  
21  
22 the understanding of HL skills of individuals and populations as well as of the relationship between HL and  
23  
24 its antecedents. In addition, the new variable generated by this combination of different HL measures (HL  
25  
26 skills) may help to better identify people with low HL skills and could be considered as a new measure of HL  
27  
28 or, at least, a different way to assess HL and its multidimensional contents. However, further studies are  
29  
30 needed to confirm our findings and to better define the potential of the combined use of different HL  
31  
32 measures.  
33  
34  
35  
36  
37  
38

## 39 **Acknowledgements**

40  
41 The authors would like to thank Mauro Grazzini and Poste Italiane for their assistance in the study  
42  
43 implementation and conduct. The authors would also like to thank the subjects whose participation made  
44  
45 this study possible.  
46  
47  
48  
49

## 50 **Funding sources**

51  
52 This research did not receive any specific grant from funding agencies in the public, commercial, or not-for-  
53  
54 profit sectors  
55  
56  
57  
58

## 59 **Ethics approval**

1  
2  
3 The study was approved by the Ethics Committee of the 'Area Vasta Centro' (Local Health Unit of Tuscany-  
4 Center, Careggi University Hospital and Meyer University Hospital; Ref. CEAVC: 10113, 01 December 2016).  
5  
6  
7  
8  
9

### 10 **Author's contribution statement**

11 Chiara Lorini: conception and design of the study; analysis and interpretation of data; drafting and revision  
12 of the manuscript.  
13

14 Vieri Lastrucci: conception and design of the study; generation, collection, assembly and interpretation of  
15 data; drafting and revision of the manuscript.  
16

17 Diana Paolini: conception and design of the study; generation, collection, assembly and interpretation of  
18 data; drafting and revision of the manuscript.  
19

20 Guglielmo Bonaccorsi: conception and design of the study; interpretation of data; drafting and revision of  
21 the manuscript.  
22

23 Other component of the Florence Health Literacy Research Group: conception and design of the study;  
24 generation, collection, assembly of data; drafting and revision of the manuscript.  
25  
26  
27  
28  
29

### 30 **Conflict of interest statement**

31 The authors declare no conflict of interest  
32  
33  
34  
35  
36  
37  
38  
39  
40  
41  
42  
43  
44  
45  
46  
47  
48  
49  
50  
51  
52  
53  
54  
55  
56  
57  
58  
59  
60

### Figures and Tables

**Figure 1.** Percentage of people with low health literacy by age class (A), educational level (B), and financial resources (C).

**Figure 2.** Percentage of people with regards to the two health literacy measures (HLS-EU-Q16 and NVS) by age class (A), educational level (B), and financial resources (C). For each graph,  $p < 0.05$  (Fisher exact test).

For peer review only

**Table 1.** Descriptive analysis of the collected data (N=212).

| Variables                                                                                               |                               | N   | %    |
|---------------------------------------------------------------------------------------------------------|-------------------------------|-----|------|
| <b>Age class</b>                                                                                        | 18-45                         | 49  | 23.1 |
|                                                                                                         | 46-55                         | 53  | 25.0 |
|                                                                                                         | 56-65                         | 73  | 34.4 |
|                                                                                                         | >65                           | 37  | 17.5 |
| <b>Educational level</b>                                                                                | Less than high school diploma | 39  | 18.4 |
|                                                                                                         | high school degree            | 77  | 36.3 |
|                                                                                                         | Bachelor's degree and higher  | 96  | 45.3 |
| <b>Financial resources at disposal from own or family income enough to get to the end of the month*</b> | Not enough                    | 10  | 4.7  |
|                                                                                                         | Barely enough                 | 56  | 26.4 |
|                                                                                                         | Enough                        | 108 | 50.9 |
|                                                                                                         | More than enough              | 37  | 17.4 |
| <b>NVS levels</b>                                                                                       | high likelihood of limited HL | 22  | 10.4 |
|                                                                                                         | possibility of limited HL     | 61  | 28.8 |
|                                                                                                         | adequate HL                   | 129 | 60.8 |
| <b>HLS-EU-Q16 levels</b>                                                                                | Inadequate HL                 | 25  | 11.8 |
|                                                                                                         | Problematic HL                | 117 | 55.2 |
|                                                                                                         | Sufficient HL                 | 70  | 33.0 |

\*1 missing value

1  
2  
3  
4  
5  
6  
7  
8  
9  
10  
11  
12  
13  
14  
15  
16  
17  
18  
19  
20  
21  
22  
23  
24  
25  
26  
27  
28  
29  
30  
31  
32  
33  
34  
35  
36  
37  
38  
39  
40  
41  
42  
43  
44  
45  
46  
47  
48  
49  
50  
51  
52  
53  
54  
55  
56  
57  
58  
59  
60

**Table 2.** Level of health literacy considering both measures (NVS and HLS-EU-Q16).

|            |                              | NVS                                          |             | Total      |
|------------|------------------------------|----------------------------------------------|-------------|------------|
|            |                              | High likelihood or possibility of limited HL | Adequate HL |            |
| HLS-EU-Q16 | Inadequate or problematic HL | 60 (28.3%)                                   | 82 (38.7%)  | 142 (67%)  |
|            | Sufficient HL                | 23 (10.8%)                                   | 47 (22.2%)  | 70 (33%)   |
| Total      |                              | 83 (39.1%)                                   | 129 (60.9%) | 212 (100%) |

**Table 3.** Multivariate ordinal logistic regression model (N=211). Dependent variable: HL skills, obtained combining the results of the two measures (HLS-EU-Q16 and NVS; “low HL skills”, “partial HL skills”, “high HL skills”). OR: Odds Ratio; SE: standard error.

| Variables                                                                                              |                               | OR    | SE    | P>z    | [95% Conf. Interval] |
|--------------------------------------------------------------------------------------------------------|-------------------------------|-------|-------|--------|----------------------|
| <b>Age class</b>                                                                                       | >65                           | 1     | -     | -      | -                    |
|                                                                                                        | 56-65                         | 2.36  | 0.982 | 0.038  | [1.047; 5.334]       |
|                                                                                                        | 46-55                         | 4.85  | 2.180 | <0.001 | [2.010; 11.706]      |
|                                                                                                        | 18-45                         | 5.14  | 2.340 | <0.001 | [2.105; 12.543]      |
| <b>Educational level</b>                                                                               | Less than high school diploma | 1     | -     | -      | -                    |
|                                                                                                        | High school degree            | 1.33  | 0.556 | 0.486  | [0.591; 3.019]       |
|                                                                                                        | Bachelor’s degree and higher  | 3.72  | 1.555 | 0.002  | [1.640; 8.442]       |
| <b>Financial resources at disposal from own or family income enough to get to the end of the month</b> | Not enough                    | 1     | -     | -      | -                    |
|                                                                                                        | Barely enough                 | 5.500 | 4.289 | 0.029  | [1.192; 25.359]      |
|                                                                                                        | Enough                        | 5.573 | 4.215 | 0.023  | [1.265; 24.540]      |
|                                                                                                        | More than enough              | 8.645 | 6.943 | 0.007  | [1.791; 41.728]      |

LR chi2(10) =51.38; Prob > chi2<0.001; Log likelihood = -193.35519; Pseudo R2=0.1173

**Table 4.** Multivariate ordinal logistic regression models (N=211). In the first model, dependent variable: NVS (three levels); in the second model, dependent variable: HLS-EU-Q16 (three levels). OR: Odds Ratio; SE: standard error.

| Variables                                                                                              |                               | I model: NVS as dependent variable* |       |        |                      | II model: HLS-EU-Q16 as dependent variable° |       |       |                      |
|--------------------------------------------------------------------------------------------------------|-------------------------------|-------------------------------------|-------|--------|----------------------|---------------------------------------------|-------|-------|----------------------|
|                                                                                                        |                               | OR                                  | SE    | P>z    | [95% Conf. Interval] | OR                                          | SE    | P>z   | [95% Conf. Interval] |
| <b>Age class</b>                                                                                       | >65                           | 1                                   | -     | -      | -                    | 1                                           | -     | -     | -                    |
|                                                                                                        | 56-65                         | 2.13                                | 0.860 | 0.060  | [0.962; 4.703]       | 1.45                                        | 0.580 | 0.357 | [0.659; 3.176]       |
|                                                                                                        | 46-55                         | 5.84                                | 2.740 | <0.001 | [2.329; 14.651]      | 1.60                                        | 0.690 | 0.271 | [0.691; 3.730]       |
|                                                                                                        | 18-45                         | 7.17                                | 3.572 | <0.001 | [2.700; 19.036]      | 1.95                                        | 0.857 | 0.126 | [0.828; 4.615]       |
| <b>Educational level</b>                                                                               | Less than high school diploma | 1                                   | -     | -      | -                    | 1                                           | -     | -     | -                    |
|                                                                                                        | High school degree            | 1.900                               | 0.762 | 0.110  | [0.865; 4.171]       | 0.65                                        | 0.259 | 0.285 | [0.300; 1.424]       |
|                                                                                                        | Bachelor’s degree and higher  | 3.781                               | 1.545 | 0.001  | [1.697; 8.425]       | 1.31                                        | 0.515 | 0.493 | [0.606; 2.829]       |
| <b>Financial resources at disposal from own or family income enough to get to the end of the month</b> | Not enough                    | 1                                   | -     | -      | -                    | 1                                           | -     | -     | -                    |
|                                                                                                        | Barely enough                 | 1.765                               | 1.156 | 0.386  | [0.489; 6.373]       | 2.310                                       | 1.561 | 0.215 | [0.615; 8.686]       |
|                                                                                                        | Enough                        | 3.396                               | 2.178 | 0.057  | [0.966; 11.937]      | 1.871                                       | 1.219 | 0.336 | [0.522; 6.707]       |
|                                                                                                        | More than enough              | 2.910                               | 2.057 | 0.131  | [0.728; 11.637]      | 3.907                                       | 2.759 | 0.054 | [0.979; 15.592]      |

\* LR chi2(10) =50.6; Prob > chi2<0.001; Log likelihood = -163.36457; Pseudo R2=0.1341

° LR chi2(10) =15.64; Prob > chi2=0.0479; Log likelihood = -192.14072; Pseudo R2=0.0391

## References

1. Kickbusch IS. Health literacy: Addressing the health and education divide. *Health Promot Int* 2001;**16**:289–97. <https://doi.org/10.1093/heapro/16.3.289>.
2. Sørensen K, Van den Broucke S, Fullam J, *et al*. Consortium Health Literacy Project European. Health literacy and public health: a systematic review and integration of definitions and models. *BMC Public Health* 2012;**12**:80. doi: 10.1186/1471-2458-12-80.
3. Van den Broucke S. Health literacy: a critical concept for public health. *Arch Public Health* 2014;**72**: 10. doi: 10.1186/2049-3258-72-10.
4. Nutbeam D. The evolving concept of health literacy. *Soc Sci Med* 2008;**67**:2072–8. doi: 10.1016/j.socscimed.2008.09.050.
5. Kickbusch I, Pelikan LM, Apfel F, *et al*. *Health literacy. The solid facts*. Copenhagen: World Health Organisation Regional Office for Europe, 2013.
6. Kobayashi L, Wardle J, Wolf MS, *et al*. Aging and functional health literacy: a systematic review and meta-analysis. *J Gerontol B Psychol Sci Soc Sci* 2016;**71**:445-57. doi: 10.1093/geronb/gbu161.
7. Bonaccorsi G, Lastrucci V, Vettori V, *et al*. Functional Health Literacy in a population-based sample in Florence: an assessment using the Newest Vital Sign. *BMJ Open* 2019;**9**:e026356. doi: 10.1136/bmjopen-2018-026356.
8. Adams RJ, Appleton SL, Hill CL, *et al*. Risks associated with low functional health literacy in an Australian population. *Med J Aust* 2009;**191**:530–4.
9. Stormacq C, Van den Broucke S, Wosinski J. Does health literacy mediate the relationship between socioeconomic status and health disparities? Integrative review. *Health Promot Int* 2018. doi: 10.1093/heapro/day062.
10. Pelikan JM, Ganahl K, Roethlin F. Health literacy as a determinant, mediator and/or moderator of health: empirical models using the European Health Literacy Survey dataset. *Glob Health Promot* 2018;**25**:57-66. doi: 10.1177/1757975918788300.
11. Nguyen TH, Paasche-Orlow MK, McCormack LA. The State of the Science of Health Literacy Measurement. *Stud Health Technol Inform* 2017;**240**:17-33. doi: 10.3233/ISU-170827.



12. Altin SV, Finke I, Kautz-Freimuth S, Stock S. The evolution of health literacy assessment tools: a systematic review. *BMC Public Health* 2014;**14**:1207. doi: 10.1186/1471-2458-14-1207.
13. Haun JN, Valerio MA, McCormack LA, *et al.* Health literacy measurement: an inventory and descriptive summary of 51 instruments. *J Health Commun* 2014;**19**:302-33. doi: 10.1080/10810730.2014.936571.
14. Jordan JE, Osborne RH, Buchbinder R. Critical appraisal of health literacy indices revealed variable underlying constructs, narrow content and psychometric weaknesses. *J Clin Epidemiol* 2011;**64**:366-79. doi: 10.1016/j.jclinepi.2010.04.005.
15. Kiechle ES, Bailey SC, Hedlund LA, *et al.* Different Measures, Different Outcomes? A Systematic Review of Performance-Based versus Self-Reported Measures of Health Literacy and Numeracy. *J Gen Intern Med* 2015;**30**:1538-46. doi: 10.1007/s11606-015-3288-4.
16. Marciano L, Camerini AL, Schulz PJ. The Role of Health Literacy in Diabetes Knowledge, Self-Care, and Glycemic Control: a meta-analysis. *J Gen Intern Med* 2019;**34**:1007-17. doi: 10.1007/s11606-019-04832-y.
17. Malloy-Weir L, Cooper M. Health literacy, literacy, numeracy and nutrition label understanding and use: a scoping review of the literature. *J Hum Nutr Diet* 2017;**30**:309-25. doi: 10.1111/jhn.12428.
18. Lorini C, Santomauro F, Donzellini M, *et al.* Health literacy and vaccination: A systematic review. *Hum Vaccin Immunother* 2018;**14**:478-88. doi: 10.1080/21645515.2017.
19. Griffin JM, Partin MR, Noorbaloochi S, *et al.* Variation in estimates of limited health literacy by assessment instruments and non-response bias. *J Gen Intern Med* 2010;**27**:675-81. doi: 10.1007/s11606-010-1304-2.
20. Pleasant A, McKinney J, Rikard RV. Health Literacy measurement: a proposed research agenda. *J Health Commun* 2011;**16**:11-21. doi: 10.1080/10810730.2011.604392.
21. McCormack L, Haun J, Sørensen K, *et al.* Recommendations for advancing health literacy measurement. *J Health Commun* 2013;**18**:9-14. doi: 10.1080/10810730.2013.829892.
22. HLS-EU Consortium. Comparative report on health literacy in eight EU member states. The European health literacy survey HLS-

- 1  
2  
3 EU. 2012 [http://ec.europa.eu/chafea/documents/news/Comparative\\_report\\_on\\_health\\_literacy\\_i](http://ec.europa.eu/chafea/documents/news/Comparative_report_on_health_literacy_in_eight_EU_member_states.pdf)  
4 [n\\_eight\\_EU\\_member\\_states.pdf](http://ec.europa.eu/chafea/documents/news/Comparative_report_on_health_literacy_in_eight_EU_member_states.pdf)  
5  
6  
7  
8 23. Almaleh R, Helmy Y, Farhat E, *et al.* Assessment of health literacy among outpatient clinics  
9 attendees at Ain Shams University Hospitals. Egypt: a cross-sectional study. *Public Health*  
10 2017;**151**:137-45. doi: 10.1016/j.puhe.2017.06.024.  
11  
12  
13  
14 24. Pelikan JM, Ganahl K. Measuring health literacy in general populations: Primary findings from the  
15 HLS-EU Consortium's Health Literacy Assessment Effort. *Stud Health Technol Inf* 2017;**240**:34-59.  
16  
17  
18 doi: 10.3233/978-1-61499-790-0-34.  
19  
20  
21 25. Waters EA, Biddle C, Kaphingst KA, *et al.* Examining the Interrelations Among Objective and  
22 Subjective Health Literacy and Numeracy and Their Associations with Health Knowledge. *J Gen*  
23 *Intern Med* 2018;**33**:1945-53. doi: 10.1007/s11606-018-4624-2.  
24  
25  
26  
27 26. Lorini C, Santomauro F, Grazzini M, *et al.* Health literacy in Italy: a cross-sectional study protocol to  
28 assess the health literacy level in a population-based sample and to validate health literacy  
29 measures in the Italian language. *BMJ Open* 2017;**7**: 017812. doi: 10.1136/bmjopen-2017-017812.  
30  
31  
32  
33 27. Lorini C, Lastrucci V, Mantwill S, *et al.* Measuring health literacy in Italy: a validation study of the  
34 HLS-EU-Q16 and of the HLS-EU-Q6 in Italian language, conducted in Florence and its surroundings.  
35  
36  
37  
38 *Ann Ist Super Sanita* 2019;**55**: 10-8. doi: 10.4415/ANN\_19\_01\_04.  
39  
40  
41 28. Capecchi L, Guazzini A, Lorini C, *et al.* The first Italian validation of the most widespread health  
42 literacy assessment tool: the Newest Vital Sign. *Epidemiol Prev* 2015;**39**: 124-8.  
43  
44  
45  
46 29. Bonaccorsi G, Pieralli F, Innocenti M, *et al.* Non-familial paid caregivers as potential flu carriers and  
47 cause of spread: the primary prevention of flu measured through their adhesion to flu vaccination  
48 campaigns - A Florentine experience. *Hum Vaccin Immunother* 2019;**2**:1-7. doi:  
49  
50  
51  
52 10.1080/21645515.2019.1593726.  
53  
54  
55 30. Bonaccorsi G, Grazzini M, Pieri L, *et al.* Assessment of Health Literacy and validation of single-item  
56 literacy screener (SILS) in a sample of Italian people. *Ann Ist Super Sanita* 2017;**53**:205-12. doi:  
57  
58  
59 10.4415/ANN\_17\_03\_05.  
60

- 1  
2  
3 31. Sørensen K, Pelikan JM, Röthlin F, *et al.* Health literacy in Europe: comparative results of the  
4 European health literacy survey (HLS-EU). *Eur J Public Health* 2015;**25**:1053-8. doi:  
5 10.1093/eurpub/ckv043.  
6  
7  
8  
9  
10 32. Sørensen K, Van den Broucke S, Pelikan JM, *et al.* Measuring health literacy in populations:  
11 illuminating the design and development process of the European Health Literacy Survey  
12 Questionnaire (HLS-EU-Q). *BMC Public Health* 2013;**13**: 948. doi: 10.1186/1471-2458-13-948.  
13  
14  
15  
16 33. Halbach SM, Ernstmann N, Kowalski C, *et al.* Unmet information needs and limited health literacy in  
17 newly diagnosed breast cancer patients over the course of cancer treatment. *Patient Educ Couns*  
18 2016;**99**:1511-18. doi: 10.1016/j.pec.2016.06.028.  
19  
20  
21  
22  
23 34. Fransen MP, Leenaars KE, Rowlands G, *et al.* International application of health literacy measures:  
24 adaptation and validation of the newest vital sign in The Netherlands. *Patient Educ Couns*  
25 2014;**97**:403-9. doi: 10.1016/j.pec.2014.08.017.  
26  
27  
28  
29  
30 35. Alba JW. Knowledge calibration what consumers know and what they think they know. *J Consum*  
31 *Res* 2000;**72**:123-65. <https://doi.org/10.1086/314317>.  
32  
33  
34 36. Carlson JP, Vincent LH, Hardesty DM, *et al.* Objective and subjective knowledge relationships: a  
35 quantitative analysis of consumer research findings. *J Consum Res* 2009;**35**:864-76.  
36  
37 <https://doi.org/10.1086/593688>.  
38  
39  
40  
41 37. Pieniak S, Aertsens J, Verbeke W. Subjective and objective knowledge as determinants of organic  
42 vegetables consumption. *Food Qual Preference* 2010;**21**:581-88.  
43  
44 <https://doi.org/10.1016/j.foodqual.2010.03.004>.  
45  
46  
47  
48 38. Schinckus L, Dangois F, Van den Broucke S, *et al.* When knowing is not enough: Emotional  
49 distress and depression reduce the positive effects of health literacy on diabetes self-management.  
50  
51 *Patient Educ Couns* 2018;**101**:324-30. doi: 10.1016/j.pec.2017.08.006.  
52  
53  
54 39. Stolp S, Zabucky KM. Contributions of metacognitive and self-regulated learning theories to  
55 investigations of calibration of comprehension. *International Electronic Journal of Elementary*  
56 *Education* 2017;**2**:7-31.  
57  
58  
59  
60

- 1  
2  
3 40. Belmi P, Neale MA, Reiff D. *et al.* The social advantage of miscalibrated individuals: the relationship  
4  
5 between social class and overconfidence and its implications for class-based inequality. *J Pers Soc*  
6  
7 *Psychol* (2019). doi: 10.1037/pspi0000187  
8  
9  
10 41. Crondahl K, Karlsson LE. The nexus between health literacy and empowerment: a scoping review.  
11  
12 *Sage Open* 2016;**6**:1-7. <https://doi.org/10.1177/2158244016646410>  
13  
14 42. Nutbeam D. Health literacy as a public health goal: a challenge for contemporary health education  
15  
16 and communication strategies into the 21<sup>st</sup> century. *Health Prom Intern* 2000;**15**:259-67.  
17  
18 <https://doi.org/10.1093/heapro/15.3.259>.  
19  
20 43. Chinn D. Critical health literacy: a review and critical analysis. *Soc Sci Med* 2011;**73**:60-7. doi:  
21  
22 10.1016/j.socscimed.2011.04.004.  
23  
24 44. Van der Heide I, Heijmans M, Schuit AJ, *et al.* Functional, interactive and critical health literacy:  
25  
26 varying relationships with control over care and number of GP visits. *Patient Educ Couns*  
27  
28 2015;**98**:998-1004. doi: 10.1016/j.pec.2015.04.006.  
29  
30 45. Fletcher RH, Fletcher SH, Fletcher Grant S. *Clinical epidemiology: the essentials*, fifth ed., Lippincott  
31  
32 Williams & Wilkins, Philadelphia 2012.  
33  
34  
35  
36  
37  
38  
39  
40  
41  
42  
43  
44  
45  
46  
47  
48  
49  
50  
51  
52  
53  
54  
55  
56  
57  
58  
59  
60

### Low Health Literacy by age class (%)

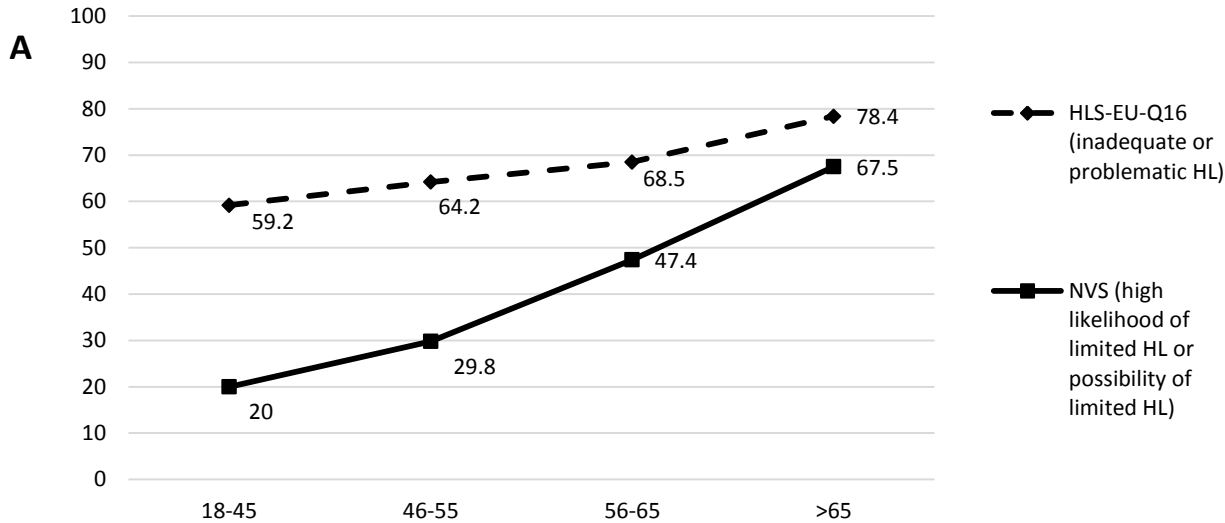

### Low Health Literacy by educational level (%)

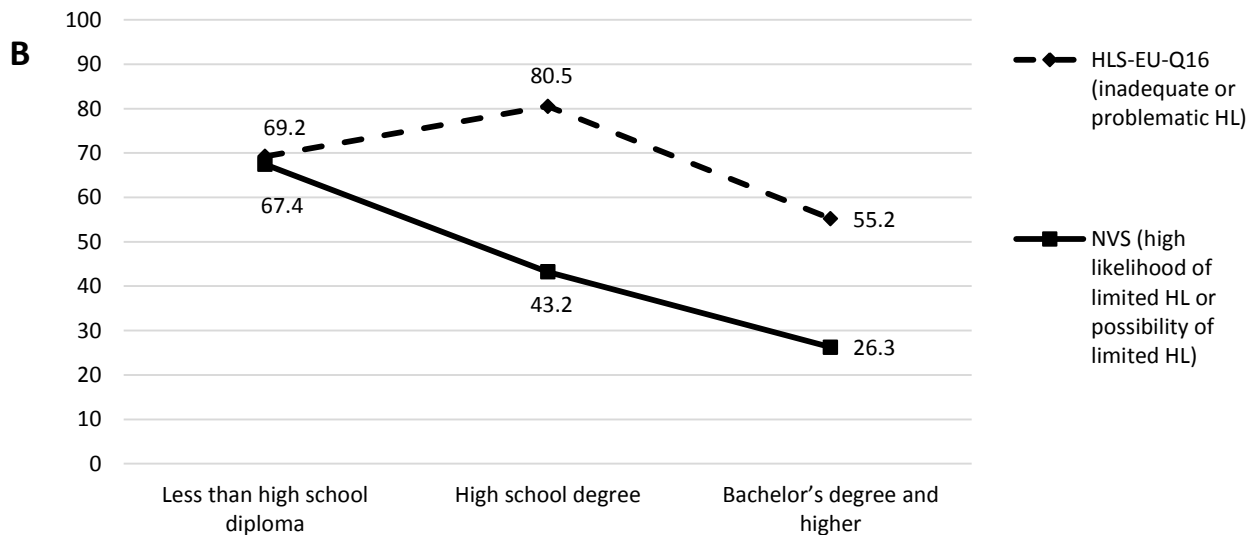

### Low Health Literacy by Financial resources (%)

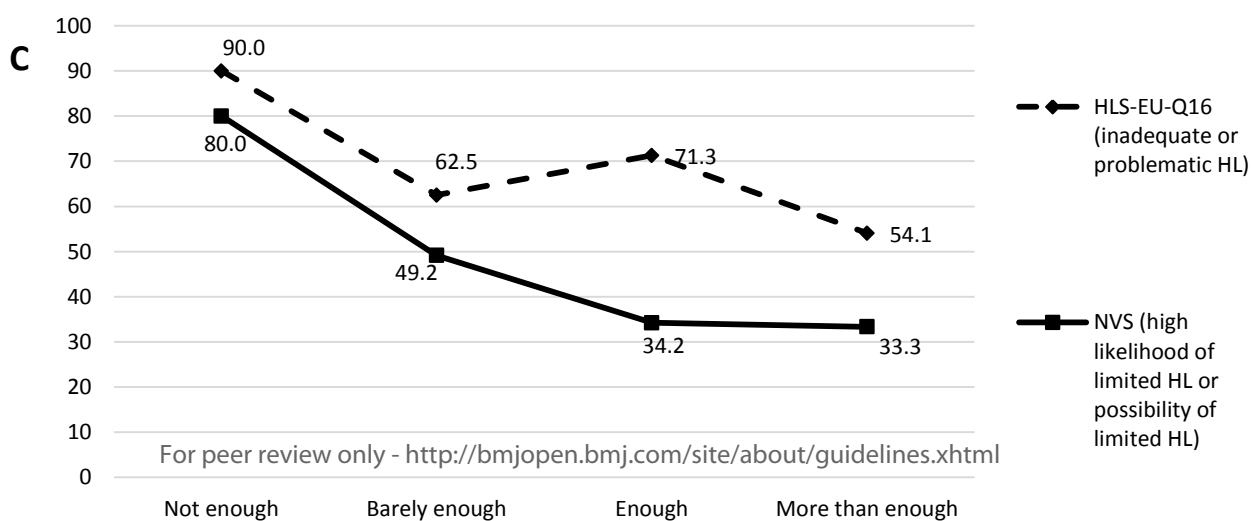

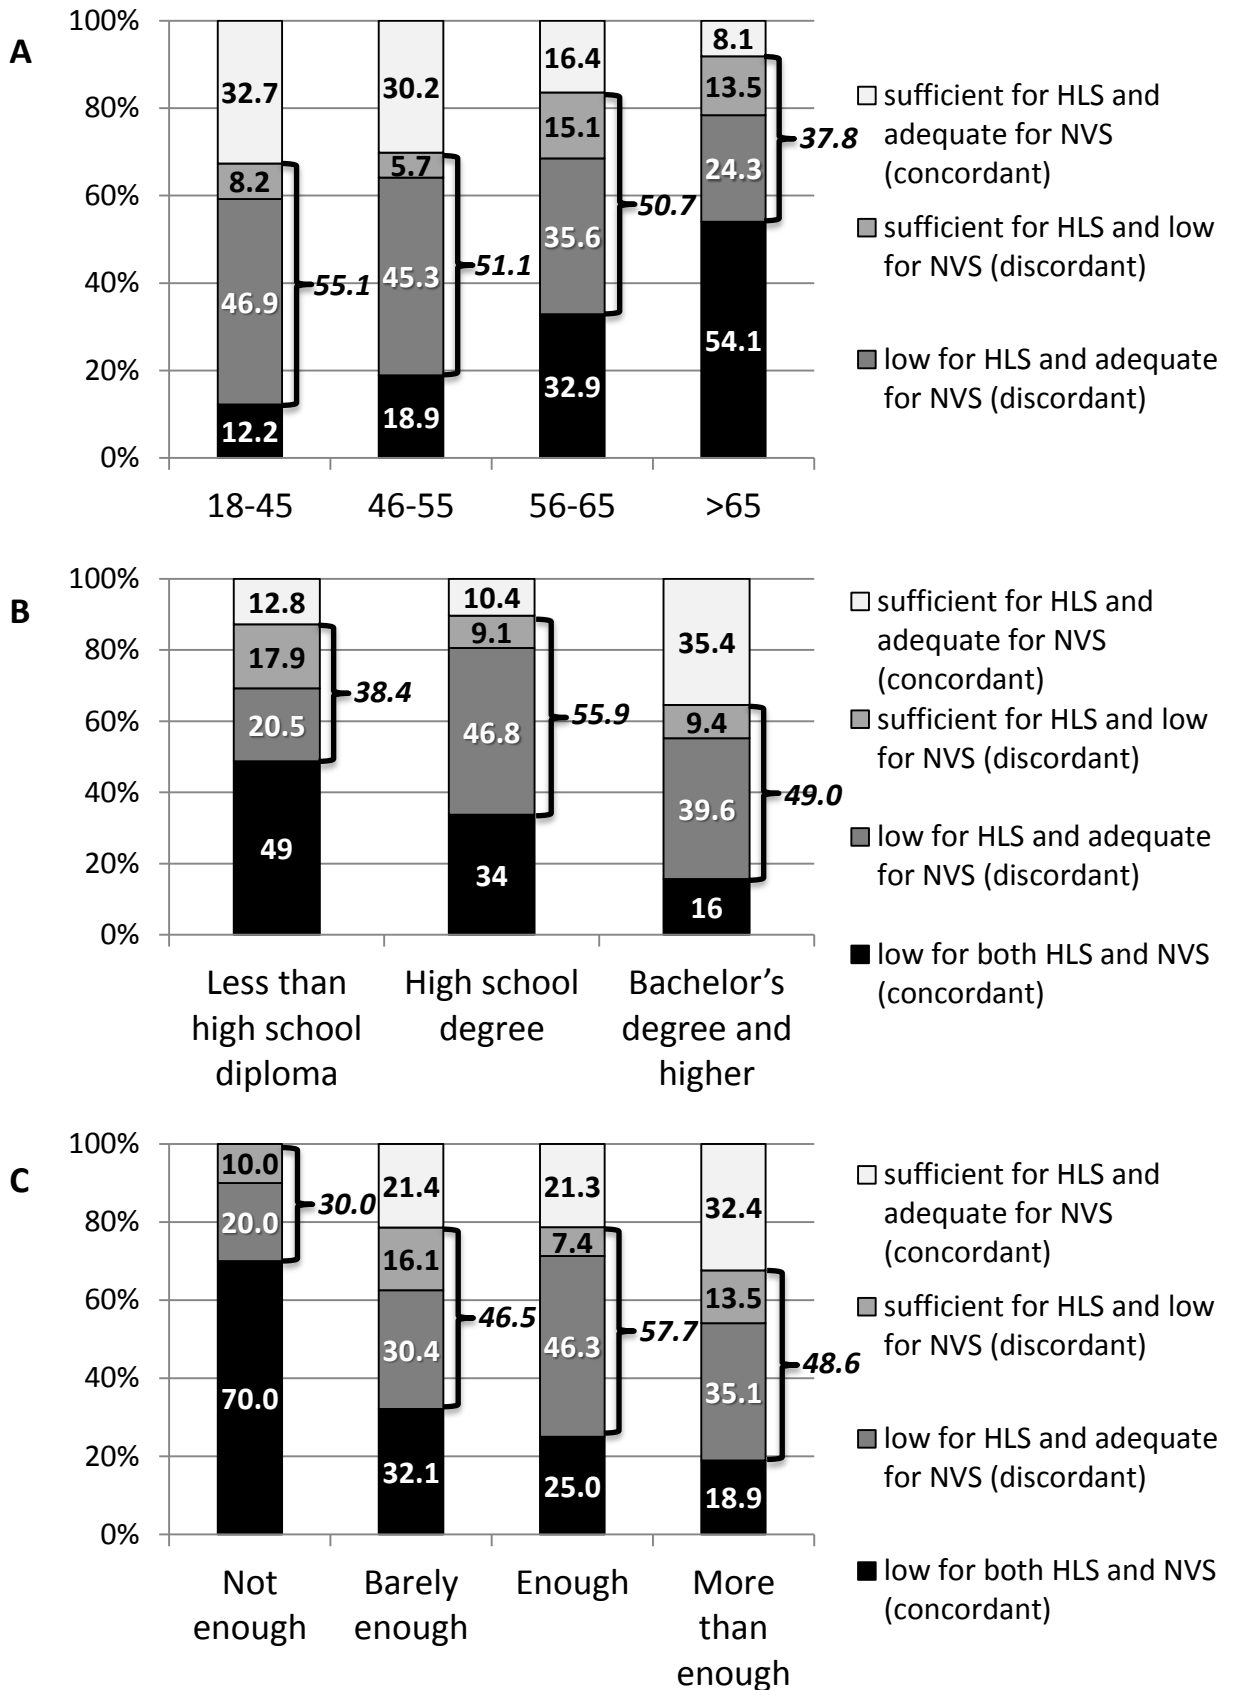

**STROBE 2007 (v4) Statement—Checklist of items that should be included in reports of *cross-sectional studies***

| Section/Topic                | Item # | Recommendation                                                                                                                                                                       | Reported on page # |
|------------------------------|--------|--------------------------------------------------------------------------------------------------------------------------------------------------------------------------------------|--------------------|
| <b>Title and abstract</b>    | 1      | (a) Indicate the study’s design with a commonly used term in the title or the abstract                                                                                               |                    |
|                              |        | (b) Provide in the abstract an informative and balanced summary of what was done and what was found                                                                                  | 2                  |
| <b>Introduction</b>          |        |                                                                                                                                                                                      |                    |
| Background/rationale         | 2      | Explain the scientific background and rationale for the investigation being reported                                                                                                 | 4; 5               |
| Objectives                   | 3      | State specific objectives, including any prespecified hypotheses                                                                                                                     | 5                  |
| <b>Methods</b>               |        |                                                                                                                                                                                      |                    |
| Study design                 | 4      | Present key elements of study design early in the paper                                                                                                                              | 6                  |
| Setting                      | 5      | Describe the setting, locations, and relevant dates, including periods of recruitment, exposure, follow-up, and data collection                                                      | 6                  |
| Participants                 | 6      | (a) Give the eligibility criteria, and the sources and methods of selection of participants                                                                                          | 6                  |
| Variables                    | 7      | Clearly define all outcomes, exposures, predictors, potential confounders, and effect modifiers. Give diagnostic criteria, if applicable                                             | 6; 7; 8            |
| Data sources/<br>measurement | 8*     | For each variable of interest, give sources of data and details of methods of assessment (measurement). Describe comparability of assessment methods if there is more than one group | 6;7; 8             |
| Bias                         | 9      | Describe any efforts to address potential sources of bias                                                                                                                            | 8                  |
| Study size                   | 10     | Explain how the study size was arrived at                                                                                                                                            | 5;6                |
| Quantitative variables       | 11     | Explain how quantitative variables were handled in the analyses. If applicable, describe which groupings were chosen and why                                                         | 8                  |
| Statistical methods          | 12     | (a) Describe all statistical methods, including those used to control for confounding                                                                                                | 8                  |
|                              |        | (b) Describe any methods used to examine subgroups and interactions                                                                                                                  | 8                  |
|                              |        | (c) Explain how missing data were addressed                                                                                                                                          |                    |
|                              |        | (d) If applicable, describe analytical methods taking account of sampling strategy                                                                                                   |                    |
|                              |        | (e) Describe any sensitivity analyses                                                                                                                                                |                    |
| <b>Results</b>               |        |                                                                                                                                                                                      |                    |

|                          |     |                                                                                                                                                                                                              |                |
|--------------------------|-----|--------------------------------------------------------------------------------------------------------------------------------------------------------------------------------------------------------------|----------------|
| Participants             | 13* | (a) Report numbers of individuals at each stage of study—eg numbers potentially eligible, examined for eligibility, confirmed eligible, included in the study, completing follow-up, and analysed            | 9              |
|                          |     | (b) Give reasons for non-participation at each stage                                                                                                                                                         | 9              |
|                          |     | (c) Consider use of a flow diagram                                                                                                                                                                           |                |
| Descriptive data         | 14* | (a) Give characteristics of study participants (eg demographic, clinical, social) and information on exposures and potential confounders                                                                     | 9; 10          |
|                          |     | (b) Indicate number of participants with missing data for each variable of interest                                                                                                                          | 17             |
| Outcome data             | 15* | Report numbers of outcome events or summary measures                                                                                                                                                         | 9; 10; 11      |
| Main results             | 16  | (a) Give unadjusted estimates and, if applicable, confounder-adjusted estimates and their precision (eg, 95% confidence interval). Make clear which confounders were adjusted for and why they were included | 19;20          |
|                          |     | (b) Report category boundaries when continuous variables were categorized                                                                                                                                    | 17; 18; 19; 20 |
|                          |     | (c) If relevant, consider translating estimates of relative risk into absolute risk for a meaningful time period                                                                                             |                |
| Other analyses           | 17  | Report other analyses done—eg analyses of subgroups and interactions, and sensitivity analyses                                                                                                               |                |
| <b>Discussion</b>        |     |                                                                                                                                                                                                              |                |
| Key results              | 18  | Summarise key results with reference to study objectives                                                                                                                                                     | 11             |
| Limitations              | 19  | Discuss limitations of the study, taking into account sources of potential bias or imprecision. Discuss both direction and magnitude of any potential bias                                                   | 13             |
| Interpretation           | 20  | Give a cautious overall interpretation of results considering objectives, limitations, multiplicity of analyses, results from similar studies, and other relevant evidence                                   | 12; 13         |
| Generalisability         | 21  | Discuss the generalisability (external validity) of the study results                                                                                                                                        | 12; 13         |
| <b>Other information</b> |     |                                                                                                                                                                                                              |                |
| Funding                  | 22  | Give the source of funding and the role of the funders for the present study and, if applicable, for the original study on which the present article is based                                                | 14             |

\*Give information separately for cases and controls in case-control studies and, if applicable, for exposed and unexposed groups in cohort and cross-sectional studies.

**Note:** An Explanation and Elaboration article discusses each checklist item and gives methodological background and published examples of transparent reporting. The STROBE checklist is best used in conjunction with this article (freely available on the Web sites of PLoS Medicine at <http://www.plosmedicine.org/>, Annals of Internal Medicine at <http://www.annals.org/>, and Epidemiology at <http://www.epidem.com/>). Information on the STROBE Initiative is available at [www.strobe-statement.org](http://www.strobe-statement.org).



# BMJ Open

**Measuring health literacy combining by performance-based and self-assessed measures.  
The roles of age, educational level, and financial resources in predicting health literacy skills: a cross-sectional study conducted in Florence (Italy)**

|                                 |                                                                                                                                                                                                                                                                                                                                                                                                                     |
|---------------------------------|---------------------------------------------------------------------------------------------------------------------------------------------------------------------------------------------------------------------------------------------------------------------------------------------------------------------------------------------------------------------------------------------------------------------|
| Journal:                        | <i>BMJ Open</i>                                                                                                                                                                                                                                                                                                                                                                                                     |
| Manuscript ID                   | bmjopen-2019-035987.R1                                                                                                                                                                                                                                                                                                                                                                                              |
| Article Type:                   | Original research                                                                                                                                                                                                                                                                                                                                                                                                   |
| Date Submitted by the Author:   | 24-Mar-2020                                                                                                                                                                                                                                                                                                                                                                                                         |
| Complete List of Authors:       | Lorini, Chiara; University of Florence, Department of Health Sciences<br>Lastrucci, Vieri; University of Florence, Department of Health Sciences<br>Paolini, Diana; University of Florence, Department of Health Sciences<br>Research Group, Florence Health Literacy ; University of Florence,<br>Department of Health Sciences<br>Bonaccorsi, Guglielmo; University of Florence, Department of Health<br>Sciences |
| <b>Primary Subject Heading</b>: | Public health                                                                                                                                                                                                                                                                                                                                                                                                       |
| Secondary Subject Heading:      | Research methods                                                                                                                                                                                                                                                                                                                                                                                                    |
| Keywords:                       | PUBLIC HEALTH, PREVENTIVE MEDICINE, STATISTICS & RESEARCH METHODS                                                                                                                                                                                                                                                                                                                                                   |
|                                 |                                                                                                                                                                                                                                                                                                                                                                                                                     |

SCHOLARONE™  
Manuscripts



I, the Submitting Author has the right to grant and does grant on behalf of all authors of the Work (as defined in the below author licence), an exclusive licence and/or a non-exclusive licence for contributions from authors who are: i) UK Crown employees; ii) where BMJ has agreed a CC-BY licence shall apply, and/or iii) in accordance with the terms applicable for US Federal Government officers or employees acting as part of their official duties; on a worldwide, perpetual, irrevocable, royalty-free basis to BMJ Publishing Group Ltd ("BMJ") its licensees and where the relevant Journal is co-owned by BMJ to the co-owners of the Journal, to publish the Work in this journal and any other BMJ products and to exploit all rights, as set out in our [licence](#).

The Submitting Author accepts and understands that any supply made under these terms is made by BMJ to the Submitting Author unless you are acting as an employee on behalf of your employer or a postgraduate student of an affiliated institution which is paying any applicable article publishing charge ("APC") for Open Access articles. Where the Submitting Author wishes to make the Work available on an Open Access basis (and intends to pay the relevant APC), the terms of reuse of such Open Access shall be governed by a Creative Commons licence – details of these licences and which [Creative Commons](#) licence will apply to this Work are set out in our licence referred to above.

Other than as permitted in any relevant BMJ Author's Self Archiving Policies, I confirm this Work has not been accepted for publication elsewhere, is not being considered for publication elsewhere and does not duplicate material already published. I confirm all authors consent to publication of this Work and authorise the granting of this licence.

## Measuring health literacy combining by performance-based and self-assessed measures.

### The roles of age, educational level, and financial resources in predicting health literacy skills: a cross-sectional study conducted in Florence (Italy)

Chiara Lorini<sup>1</sup>, Vieri Lastrucci<sup>1\*</sup>, Diana Paolini<sup>1</sup>, Florence Health Literacy Research Group<sup>^</sup>, Guglielmo Bonaccorsi<sup>1</sup>

<sup>^</sup>Florence Health Literacy Research Group: Elisabetta Alti<sup>3</sup>, Sergio Baglioni<sup>3</sup>, Leonardo Bellino<sup>3</sup>, Niccolò Berzi<sup>3</sup>, Jacopo Bianchi<sup>4</sup>, Guglielmo Bonaccorsi<sup>1</sup>, Giuseppe Burgio<sup>3</sup>, Alessandro Bussotti<sup>5</sup>, Marco Del Riccio<sup>1</sup>, Martina Donzellini<sup>4</sup>, Angela Galdiero<sup>6</sup>, Alessandro Grassi<sup>3</sup>, Tommaso Grassi<sup>4</sup>, Vieri Lastrucci<sup>1</sup>, Arrigo Lombardi<sup>3</sup>, Chiara Lorini<sup>1</sup>, Sarah Mantwill<sup>2</sup>, Federico Manzi<sup>4</sup>, Alessandro Mereu<sup>3</sup>, Donatella Messina<sup>3</sup>, Chiara Milani<sup>4</sup>, Diana Paolini<sup>1</sup>, Marco Targonato<sup>3</sup>, Marco Toccafondi<sup>3</sup>, Gino Sartor<sup>4</sup>, Virginia Vettori<sup>1</sup>

1. Department of Health Science, University of Florence, Florence, Italy
2. Department of Health Sciences & Health Policy, University of Lucerne, Lucerne, Switzerland
3. General Practitioner, Local Health Unit - Toscana Centro, Italy
4. School of Specialization in Hygiene and Preventive Medicine, University of Florence, Florence, Italy
5. Careggi University Hospital, Florence, Italy
6. Local Health Unit - Toscana Centro, Italy

\*Corresponding author:

Vieri Lastrucci; e-mail: [vieri.lastrucci@gmail.com](mailto:vieri.lastrucci@gmail.com); Postal address: Viale Morgagni, 48, 50134 Firenze, Italy

1  
2  
3  
4  
5  
6  
7  
8  
9  
10  
11  
12  
13  
14  
15  
16  
17  
18  
19  
20  
21  
22  
23  
24  
25  
26  
27  
28  
29  
30  
31  
32  
33  
34  
35  
36  
37  
38  
39  
40  
41  
42  
43  
44  
45  
46  
47  
48  
49  
50  
51  
52  
53  
54  
55  
56  
57  
58  
59  
60

## **Abstract**

### *Objective*

The objective was to compare the results of performance-based and self-assessed measures of health literacy (HL) and to evaluate the contribution of their joint use in assessing some HL antecedents.

### *Design*

This was a cross-sectional study.

### *Setting*

The study was conducted on the general population.

### *Participants*

This study is part of a larger one, where participants were randomly selected from the registries of eleven general practitioners (GPs) working in the municipality of Florence. Inclusion criteria were the following: 18-69 years of age and Italian speaking. Exclusion criteria included cognitive impairment, severe psychiatric disease, or end-stage disease. In this paper, 212 adults were included.

### *Outcome measures*

HL was measured using the European Health Literacy Survey Questionnaire (HLS-EU-Q16) and the Newest Vital Sign (NVS). The HL levels obtained by means of the two measurement tools were combined into a new variable that described three different levels of HL skills: low HL skills, partial HL skills, and high HL skills. Multivariate ordinal logistic regression analysis was performed to assess the predictive roles of age class, educational level, and financial resources with respect to HL skills.

### *Results*

Twenty-two percent of the sample had high HL skills, 28.3% had low HL skills, and 49.5% had partial HL skills. Educational level, age class and financial resources were significantly associated with HL skills, with OR values being higher than those obtained using the NVS or the HLS-EU-Q16 individually.

### *Conclusion*

1  
2  
3 The combination of the results obtained using the NVS and the HLS-EU-Q16 improves the understanding of  
4  
5 HL. The new variable generated by this combination could be considered as a different way to assess HL and  
6  
7 its multidimensional contents.  
8  
9

10  
11  
12 **Trial registration number** CEAVC:10113.  
13

### 14 15 16 17 **Strengths and limitations of this study** 18

- 19  
20  
21  
22 • In this study, for the first time, two different measures of health literacy (HL) were combined into a  
23  
24 new variable, called “HL skills”.
- 25  
26  
27 • The study design (sampling procedure, criteria for the combination of the HL measures) led to  
28  
29 limitations in the generalizability of the results.
- 30  
31  
32 • A different approach in combining the two measures could have led to different results.  
33  
34  
35  
36  
37  
38  
39  
40  
41  
42  
43  
44  
45  
46  
47  
48  
49  
50  
51  
52  
53  
54  
55  
56  
57  
58  
59  
60

1  
2  
3  
4  
5  
6  
7  
8  
9  
10  
11  
12  
13  
14  
15  
16  
17  
18  
19  
20  
21  
22  
23  
24  
25  
26  
27  
28  
29  
30  
31  
32  
33  
34  
35  
36  
37  
38  
39  
40  
41  
42  
43  
44  
45  
46  
47  
48  
49  
50  
51  
52  
53  
54  
55  
56  
57  
58  
59  
60

## Introduction

Health literacy (HL) is a multidimensional concept<sup>1</sup> that deals with broader competences that are needed to communicate, navigate, and actively participate within modern health care systems and, more generally, with an individual's capacity to assess, understand, and use health information in different settings<sup>2,3</sup>. The skills that compose HL can be classified into three different typologies: the practical application of literacy skills ranging from those needed to be able to function effectively in everyday situations (functional); the cognitive and literacy skills that can be used to actively participate in everyday activities and to apply new information to changing circumstances (interactive); and cognitive skills that can be applied to critically analyse information and exert greater control over life events and situations (critical literacy)<sup>4</sup>. All of these competences enable a person to navigate within three domains: healthcare, disease prevention, and health promotion<sup>2</sup>. For these reasons, HL affects people's health, and it is now considered as one of the main determinants of health inequality; it is significantly related to age, educational level, and economic status<sup>5-8</sup> and is suggested to partially mediate the effect of socioeconomic status on health-related outcomes<sup>9,10,11</sup>. Moreover, HL can also be considered as the balance between individual skills and the demands and complexities of societal systems<sup>12</sup>; it is the combination of cognitive capacities, life experiences, knowledge, and opportunities<sup>13,14</sup>.

To date, several different definitions of HL have been proposed in the literature; as a result, a considerable number of HL measurement tools have been developed by now. Although this variety of measures permits the use of specific tools for specific aims and target groups, it rises debate and poses some challenges. Indeed, more than 150 measures exist, but no "gold standard" measure has emerged until now. Furthermore, only a small number of instruments examine multiple types of HL (functional, interactive, and critical), while the majority deal solely with the functional component, with the risk of fragmentation. Apart from that, measurement tools may be classified as either performance-based (objective) or self-assessed (subjective), as they capture different aspects, for example, the objective ability to understand medical information versus the effect of emotional or motivational aspects on the decision-making process<sup>15-18</sup>. As a consequence of the

1  
2  
3 lack of a comprehensive approach to HL measurement, the use of different or fragmented HL measures leads  
4  
5 to difficulties in comparing and/or to incomplete results in terms of the HL level and related outcomes, as  
6  
7 well as to an increasing risk of misinterpreting the effectiveness of interventions aimed at improving HL<sup>19-24</sup>.

8  
9 Besides, while performance-based tools can be assumed to objectively measure HL regardless of a person's  
10  
11 environment, self-assessed ones can be considered to be more situation specific; for instance, emotional or  
12  
13 motivational aspects of the decision-making process are also the consequence of family, community, and  
14  
15 system support<sup>13</sup>.

16  
17 For these reasons, many authors suggest measuring HL using different instruments at the same time, so as  
18  
19 to assess different skills, abilities, and competences that constitute such a multidimensional construct<sup>15-25</sup>.

20  
21 Nevertheless, research using performance-based (i.e., direct testing of competences) and self-assessed  
22  
23 (perception-based, i.e., self-reported abilities) measures of different dimensions and types of HL  
24  
25 simultaneously remains scarce, and the results of such studies are usually focused on highlighting the  
26  
27 inconsistencies between the two types of tests, without assessing their potential joint contribution to  
28  
29 measuring HL as a unique concept<sup>14,19,26,27</sup>.

30  
31 In a study conducted on patients affected by diabetes or colon cancer, Waters et al.<sup>28</sup> found that  
32  
33 performance-based and self-assessed HL measures represent related but independent constructs; they are  
34  
35 able to predict objective disease knowledge but not perceived disease knowledge in the same way. Due to  
36  
37 these results, the author concluded that performance-based and self-assessed measures of HL are not  
38  
39 interchangeable, although they tend to be consistent in categorizing patients into different levels of HL<sup>28</sup>. To  
40  
41 the best of our knowledge, no studies adopting a similar approach to the analysis of the HL determinants  
42  
43 have been published as yet.

44  
45 The aim of this study is to compare the results of performance-based and self-assessed measures of HL and  
46  
47 to evaluate the potential contribution of their joint use in assessing some HL antecedents (age and socio-  
48  
49 economical determinants) in a population-based sample. We believe that this is the first attempt to use the  
50  
51

1  
2  
3 information obtained by different HL measurement tools to get further insight into the knowledge about the  
4  
5 antecedents of HL.  
6  
7  
8  
9

## 10 **Methods**

11  
12  
13

14 This study is part of a larger one, conducted in a population-based sample in Florence, Italy, with the aim of  
15  
16 measuring the HL level and validating some HL measurement tools. The study design is described  
17  
18 elsewhere<sup>29</sup>, as well as some of its results<sup>30</sup>.  
19  
20  
21  
22

### 23 *Data collection*

24

25 The study adopted a cross-sectional design that was carried out in a population-based sample. Participants  
26  
27 were randomly selected from the registries of eleven general practitioners (GPs) working in the municipality  
28  
29 of Florence. The municipality of Florence is about 102 km<sup>2</sup> in size, with a population density of about 3500  
30  
31 inhabitants/km<sup>2</sup>; socio-economic and health deprivation data are described elsewhere<sup>31</sup>.  
32  
33

34 The sample size of the study was calculated considering the first aim of the larger study (i.e., to assess the  
35  
36 level of functional HL using the Newest Vital Sign (NVS) in a population sample in Florence, Italy), as described  
37  
38 elsewhere<sup>7</sup>, and it was equal to 480 participants.  
39  
40

41 The GPs were recruited using convenience criteria: all of the GPs from the municipality of Florence were  
42  
43 invited to join the study by both the Provincial Medical Council and the University Hospital of Florence.  
44  
45 According to the study protocol, the first eight who voluntarily joined the study were included and were  
46  
47 asked to select 80 subjects among those registered as patients using a simple random sampling method.  
48  
49 Since oversampling was not enough to reach the sample size of 480, three more GPs were included, with a  
50  
51 second random sample for the first eight. In Italy, every resident over the age of 18 has to be registered in a  
52  
53 general practice, and people are enrolled in the general practices according to their place of residence. This  
54  
55 sampling method was chosen with the aim of increasing the population participation rate, as the invitation  
56  
57 letter was jointly signed by the general practitioners and the researcher in charge of the study.  
58  
59  
60



1  
2  
3 The sample was selected within each neighbourhood of the municipality of Florence, since the recruited  
4  
5 general practices were based in all the areas of Florence.  
6

7 The inclusion criteria were the following: 18–69 years of age and Italian speaking (since the survey was  
8  
9 conducted in Italian). The inclusion criteria were defined according to those of the Italian behavioural risk  
10  
11 factor surveillance system PASSI (*Progressi delle Aziende Sanitarie per la Salute in Italia*)<sup>32</sup>. The exclusion  
12  
13 criteria included cognitive impairment, severe psychiatric disease, or end-stage diseases. Each GP verified  
14  
15 the inclusion and exclusion criteria when selecting the sample.  
16  
17

18 The larger study included two different arms (A and B) with different aims and questionnaires. Each subject  
19  
20 was randomly allocated to one of the two arms. To meet the specific aims of the present study, only the B  
21  
22 arm of the research was considered, since the short form (16 items) of the European Health Literacy Survey  
23  
24 Questionnaire (HLS-EU-Q16) was only administered in this arm, together with the Italian version of the  
25  
26 Newest Vital Sign (NVS-IT, hereinafter, NVS).  
27  
28

29 Data collection started in February 2017 and finished on 31 December 2017. Each selected subject was  
30  
31 contacted via postal mail. Subjects received an information sheet signed by the GP and the person in-charge  
32  
33 of the study, which included a short description of the study, an invitation to participate, and a consent form.  
34  
35 Participants were asked to sign the consent form and return it via mail to the researchers in charge. The mail  
36  
37 also contained the nutritional label of the NVS. After receipt of the signed consent forms, the subjects were  
38  
39 contacted for a computer-assisted telephone interview. If the consent form was not received within 2 weeks,  
40  
41 a follow-up phone call was made by the research group. The phone call served to clarify any questions and  
42  
43 to identify and support people having difficulty completing the consent form (i.e., due to reading difficulty).  
44  
45  
46  
47  
48  
49  
50  
51  
52  
53  
54  
55  
56  
57  
58  
59  
60  
61  
62  
63  
64  
65  
66  
67  
68  
69  
70  
71  
72  
73  
74  
75  
76  
77  
78  
79  
80  
81  
82  
83  
84  
85  
86  
87  
88  
89  
90  
91  
92  
93  
94  
95  
96  
97  
98  
99  
100  
101  
102  
103  
104  
105  
106  
107  
108  
109  
110  
111  
112  
113  
114  
115  
116  
117  
118  
119  
120  
121  
122  
123  
124  
125  
126  
127  
128  
129  
130  
131  
132  
133  
134  
135  
136  
137  
138  
139  
140  
141  
142  
143  
144  
145  
146  
147  
148  
149  
150  
151  
152  
153  
154  
155  
156  
157  
158  
159  
160  
161  
162  
163  
164  
165  
166  
167  
168  
169  
170  
171  
172  
173  
174  
175  
176  
177  
178  
179  
180  
181  
182  
183  
184  
185  
186  
187  
188  
189  
190  
191  
192  
193  
194  
195  
196  
197  
198  
199  
200  
201  
202  
203  
204  
205  
206  
207  
208  
209  
210  
211  
212  
213  
214  
215  
216  
217  
218  
219  
220  
221  
222  
223  
224  
225  
226  
227  
228  
229  
230  
231  
232  
233  
234  
235  
236  
237  
238  
239  
240  
241  
242  
243  
244  
245  
246  
247  
248  
249  
250  
251  
252  
253  
254  
255  
256  
257  
258  
259  
260  
261  
262  
263  
264  
265  
266  
267  
268  
269  
270  
271  
272  
273  
274  
275  
276  
277  
278  
279  
280  
281  
282  
283  
284  
285  
286  
287  
288  
289  
290  
291  
292  
293  
294  
295  
296  
297  
298  
299  
300  
301  
302  
303  
304  
305  
306  
307  
308  
309  
310  
311  
312  
313  
314  
315  
316  
317  
318  
319  
320  
321  
322  
323  
324  
325  
326  
327  
328  
329  
330  
331  
332  
333  
334  
335  
336  
337  
338  
339  
340  
341  
342  
343  
344  
345  
346  
347  
348  
349  
350  
351  
352  
353  
354  
355  
356  
357  
358  
359  
360  
361  
362  
363  
364  
365  
366  
367  
368  
369  
370  
371  
372  
373  
374  
375  
376  
377  
378  
379  
380  
381  
382  
383  
384  
385  
386  
387  
388  
389  
390  
391  
392  
393  
394  
395  
396  
397  
398  
399  
400  
401  
402  
403  
404  
405  
406  
407  
408  
409  
410  
411  
412  
413  
414  
415  
416  
417  
418  
419  
420  
421  
422  
423  
424  
425  
426  
427  
428  
429  
430  
431  
432  
433  
434  
435  
436  
437  
438  
439  
440  
441  
442  
443  
444  
445  
446  
447  
448  
449  
450  
451  
452  
453  
454  
455  
456  
457  
458  
459  
460  
461  
462  
463  
464  
465  
466  
467  
468  
469  
470  
471  
472  
473  
474  
475  
476  
477  
478  
479  
480  
481  
482  
483  
484  
485  
486  
487  
488  
489  
490  
491  
492  
493  
494  
495  
496  
497  
498  
499  
500  
501  
502  
503  
504  
505  
506  
507  
508  
509  
510  
511  
512  
513  
514  
515  
516  
517  
518  
519  
520  
521  
522  
523  
524  
525  
526  
527  
528  
529  
530  
531  
532  
533  
534  
535  
536  
537  
538  
539  
540  
541  
542  
543  
544  
545  
546  
547  
548  
549  
550  
551  
552  
553  
554  
555  
556  
557  
558  
559  
560  
561  
562  
563  
564  
565  
566  
567  
568  
569  
570  
571  
572  
573  
574  
575  
576  
577  
578  
579  
580  
581  
582  
583  
584  
585  
586  
587  
588  
589  
590  
591  
592  
593  
594  
595  
596  
597  
598  
599  
600  
601  
602  
603  
604  
605  
606  
607  
608  
609  
610  
611  
612  
613  
614  
615  
616  
617  
618  
619  
620  
621  
622  
623  
624  
625  
626  
627  
628  
629  
630  
631  
632  
633  
634  
635  
636  
637  
638  
639  
640  
641  
642  
643  
644  
645  
646  
647  
648  
649  
650  
651  
652  
653  
654  
655  
656  
657  
658  
659  
660  
661  
662  
663  
664  
665  
666  
667  
668  
669  
670  
671  
672  
673  
674  
675  
676  
677  
678  
679  
680  
681  
682  
683  
684  
685  
686  
687  
688  
689  
690  
691  
692  
693  
694  
695  
696  
697  
698  
699  
700  
701  
702  
703  
704  
705  
706  
707  
708  
709  
710  
711  
712  
713  
714  
715  
716  
717  
718  
719  
720  
721  
722  
723  
724  
725  
726  
727  
728  
729  
730  
731  
732  
733  
734  
735  
736  
737  
738  
739  
740  
741  
742  
743  
744  
745  
746  
747  
748  
749  
750  
751  
752  
753  
754  
755  
756  
757  
758  
759  
760  
761  
762  
763  
764  
765  
766  
767  
768  
769  
770  
771  
772  
773  
774  
775  
776  
777  
778  
779  
780  
781  
782  
783  
784  
785  
786  
787  
788  
789  
790  
791  
792  
793  
794  
795  
796  
797  
798  
799  
800  
801  
802  
803  
804  
805  
806  
807  
808  
809  
810  
811  
812  
813  
814  
815  
816  
817  
818  
819  
820  
821  
822  
823  
824  
825  
826  
827  
828  
829  
830  
831  
832  
833  
834  
835  
836  
837  
838  
839  
840  
841  
842  
843  
844  
845  
846  
847  
848  
849  
850  
851  
852  
853  
854  
855  
856  
857  
858  
859  
860  
861  
862  
863  
864  
865  
866  
867  
868  
869  
870  
871  
872  
873  
874  
875  
876  
877  
878  
879  
880  
881  
882  
883  
884  
885  
886  
887  
888  
889  
890  
891  
892  
893  
894  
895  
896  
897  
898  
899  
900  
901  
902  
903  
904  
905  
906  
907  
908  
909  
910  
911  
912  
913  
914  
915  
916  
917  
918  
919  
920  
921  
922  
923  
924  
925  
926  
927  
928  
929  
930  
931  
932  
933  
934  
935  
936  
937  
938  
939  
940  
941  
942  
943  
944  
945  
946  
947  
948  
949  
950  
951  
952  
953  
954  
955  
956  
957  
958  
959  
960  
961  
962  
963  
964  
965  
966  
967  
968  
969  
970  
971  
972  
973  
974  
975  
976  
977  
978  
979  
980  
981  
982  
983  
984  
985  
986  
987  
988  
989  
990  
991  
992  
993  
994  
995  
996  
997  
998  
999  
1000

1  
2  
3 Age was collected as a continuous variable and then grouped into four classes (18–45; 46–55; 56–65; >65  
4  
5 years old). Education was classified into three levels (less than high school diploma; high school degree;  
6  
7 bachelor’s degree and higher), while the financial status was investigated by the item “Is your income  
8  
9 adequate to meet monthly living expenses?” with four possible response options (not enough; barely  
10  
11 enough; enough; more than enough). This item was chosen since it is routinely used in the standardized  
12  
13 questionnaire of the Italian behavioural risk factor surveillance system PASSI<sup>33</sup>.  
14  
15  
16  
17

### 18 *HL measures*

19  
20 HL was measured using the NVS and the HLS-EU-Q16. The Italian version of the NVS was validated by  
21  
22 Capecchi et al. from the UK version<sup>34</sup>, and then it was applied in many different contexts<sup>35,36</sup>. It consists of an  
23  
24 ice cream nutrition label with seven associated questions that measure functional HL (prose and numeracy)  
25  
26 using a performance-based approach. It produces a final score ranging from 0 to 6, allowing participants to  
27  
28 be classified into three categories—high likelihood of limited HL (score: 0–1), possibility of limited HL (score:  
29  
30 2–3), and adequate HL (score: 4–6). These cut-off values were identified by Weiss et al. in a validation study  
31  
32 of the NVS, conducted in English-speaking and Spanish-speaking primary care patients, in which the HL  
33  
34 measured using the Test of Functional Health Literacy in Adults (TOFHLA) was considered as a reference<sup>37</sup>.  
35  
36  
37  
38 The HL categories defined using the two cut off values (1 and 3) are widely used in many countries.  
39  
40 NVS data related to the entire sample of the study (A and B arms) have been described elsewhere<sup>7</sup>.  
41  
42

43  
44 The European Health Literacy Survey was the first large population study aimed at generating first-time data  
45  
46 on HL across diverse populations in the European Union<sup>38</sup>. To achieve this purpose, the European Health  
47  
48 Literacy Survey Questionnaire (HLS-EU-Q) for measuring HL was developed<sup>39</sup> on the basis of the  
49  
50 recommendations of Pleasant et al.<sup>24</sup> regarding the characteristics that a comprehensive measure of HL  
51  
52 should have. In particular, starting from the HLS-EU Consortium conceptual framework of HL<sup>2</sup>, the HLS-EU-Q  
53  
54 assesses the processes of accessing, understanding, appraising, and applying health-related information  
55  
56 within the three domains of health: healthcare, disease prevention, and health promotion. It measures self-  
57  
58 assessed functional, critical, and interactive HL (i.e., general HL). The original full version of the HLS-EU-Q  
59  
60

1  
2  
3 comprises 47 items (HLS-EU-Q47), and the HLS-EU-Q16 is its short version that was developed by selecting  
4  
5 16 items<sup>27</sup>. The HLS-EU-Q16 has Likert-type responses (“very easy”, “fairly easy”, “fairly difficult”, “very  
6  
7 difficult”) and an associated final score that measures interaction, comprehension, information seeking,  
8  
9 application/function, decision-making/critical thinking, evaluation, responsibility, confidence, and navigation  
10  
11 skills. To generate the score of the HLS-EU-Q16, the items are dichotomized into two categories with two  
12  
13 scores: “easy” (“fairly” or “very” easy = 1) and “difficult” (“fairly” and “very” difficult = 0). “Don’t  
14  
15 know/refusal” was recoded for missing answers. The scale score was calculated as the sum of the scores of  
16  
17 each item and varied between 0 and 16. As suggested by other studies<sup>26,40</sup>, only respondents who gave an  
18  
19 answer to at least 14 items were considered. Three levels of HL were defined considering the HLS-EU-Q16  
20  
21 score: inadequate HL (0–8), problematic HL (9–12) and sufficient HL (13–16). The cut-off values for defining  
22  
23 the three levels were described by Pelikan et al. using the results of the European Health Literacy Survey,  
24  
25 with respect to the results obtained using the HLS-EU-Q47<sup>41</sup>, and then have been widely used.  
26  
27  
28 As previously described, the Italian version of the HLS-EU-Q16 was validated in this study<sup>30</sup>.

### 34 *Statistical analysis*

35  
36 The Fisher exact test was used to evaluate associations between categorical variables.

37  
38 A new variable, named “HL skills”, was defined by combining the results obtained using the two tests (HLS-  
39  
40 EU-Q16 and NVS). The criterion used for combining the two measures was a simple approach that allowed  
41  
42 to different levels of skills to be identified. In particular, the variable was created as follows:

- 43  
44 1) “low HL skills” level that comprises a high likelihood or possibility of limited HL measured by NVS and  
45  
46 inadequate or problematic HL measured by HLS-EU-Q16;
  - 47  
48 2) “partial HL skills” level that comprises a high likelihood or possibility of limited HL measured by NVS  
49  
50 and sufficient HL measured by HLS-EU-Q16 or, conversely, adequate HL measured by NVS and  
51  
52 inadequate or problematic HL according to HLS-EU-Q16;
  - 53  
54 3) “high HL skills” level that comprises adequate HL measured by NVS and sufficient HL measured by  
55  
56 HLS-EU-Q16.
- 57  
58  
59  
60

1  
2  
3 The subjects classified among those with “low HL skills” presented some limitations in both functional and  
4 general HL; those with “partial HL skills” presented some limitation either in functional or in general HL; while  
5 those with “high HL skills” presented the highest level of HL skills in both functional and general HL.  
6  
7  
8

9  
10 A multivariate ordinal logistic regression analysis<sup>42</sup> was performed to assess the predictive roles of age class,  
11 educational level, and financial resources with respect to “HL skills”. Specifically, “HL skills” was the  
12 dependent ordinal variable while age class, educational level, and financial resources were the independent  
13 ordinal variables (covariates). In ordinal logistic regression model, the predictive role is expressed as the  
14 proportional odds ratio (OR), and it can be interpreted in the same way as ORs are interpreted for the  
15 conventional logistic regression for binary outcomes. The OR obtained from this model was a measure of the  
16 change in the odds from lower to higher levels, i.e., from lower to higher HL skills. As a comparison, the same  
17 multivariate ordinal logistic regression analysis was applied considering the level of HL measured by each  
18 single HL test (i.e., NVS and HLS-EU-Q16) as a dependent ordinal variable. Specifically, two models were  
19 developed: in the first one, the NVS level was the dependent variable (1—high likelihood of limited HL; 2—  
20 possibility of limited HL; 3—adequate HL), while in the second one, the HLS-EU-Q16 level was the dependent  
21 variable (1—inadequate HL; 2—problematic HL; 3—sufficient HL).  
22  
23  
24  
25  
26  
27  
28  
29  
30  
31  
32  
33  
34  
35

36 Statistical analyses were conducted using Stata version 15 (Stata Corp, College Station, TX). All tests were  
37 two-sided, and p-values were considered to be statistically significant when below 0.05.  
38  
39  
40  
41  
42

#### 43 *Patient and public involvement*

44  
45 The study population was not directly involved in the design, recruitment, and conduct of this study.  
46  
47 However, the Florence Health Literacy Research Group involved representatives from the Provincial Medical  
48 Council, Local Health Unit, and University Hospital of Florence. All of these representatives were involved in  
49  
50 the study design and questionnaire development and will disseminate the results from this work.  
51  
52  
53  
54  
55

#### 56 **Results**

1  
2  
3 The refusal rate was 15.6%, while 38.2% of the invited people did not respond to any contact attempts and  
4 were considered unreachable. Finally, 212 subjects (58% females; mean age: 53.6 ±11.9 years) were  
5 interviewed for the purpose of this study. The majority of them (96.7%) were Italian, with a high school  
6 (36.3%) or university (45.3%) degree, and had enough or more than enough financial resources at their  
7 disposal from their own or family income to get to the end of the month (68.3%) (Table 1).  
8  
9

10  
11  
12 According to the HLS-EU-Q16, 11.8% had inadequate, 55.2% had problematic, and 33% had sufficient HL;  
13 considering the NVS, 10.4% had a high likelihood of having limited HL, 28.8% had a possibility of having  
14 limited HL, and 60.8% had adequate HL (Table 1).  
15  
16

17  
18  
19 As for NVS, the HL levels were significantly ( $p < 0.05$ ) associated with age class, educational level, and financial  
20 resources, while when measured by HLS-EU-Q16, the HL levels were significantly ( $p < 0.05$ ) associated only  
21 with education. The percentage of people with low HL was higher when it was measured by HLS-EU-Q16 than  
22 for NVS in each category of age class, educational level, and financial resources (Figure 1). For both measures,  
23 the percentage of people with low HL increased with age and became more similar in older people: for HLS-  
24 EU-Q16, it ranged from 59.2% for those aged 18–45 to 78.4% for those >65 years old; for NVS, it ranged from  
25 20% for those aged 18–45 to 67.5% for those aged >65 years old. Similar results were observed for  
26 educational level and financial resources: for both tests, the percentage of people with low HL increased with  
27 a decrease in educational level or financial resources; in the lowest sub-categories (i.e., less than high school  
28 diploma or not having enough financial resources), the percentage of people with low HL became similar  
29 between the two tests.  
30  
31

32  
33  
34 Combining the classifications of both tests (Table 2), 22% of the sample had adequate levels of functional  
35 (measured by NVS) and sufficient general HL (measured by HLS-EU-Q16). On the other hand, 28.3%  
36 presented both low functional HL (high likelihood or possibility of limited HL measured by NVS) and low  
37 general HL (inadequate or problematic HL according to HLS-EU-Q16). However, a greater part of the sample  
38 (49.5%) presented inconsistent HL measurements with low functional HL and sufficient general HL or vice  
39 versa. In particular, the percentage of participants with adequate functional HL and low general HL (38.7%)  
40 was higher than the percentage of participants with low functional HL and sufficient general HL (10.8%).  
41  
42  
43  
44  
45  
46  
47  
48  
49  
50  
51  
52  
53  
54  
55  
56  
57  
58  
59  
60

1  
2  
3 The classification of the subjects into four HL groups (combining the two HL measures) was significantly  
4 associated with age class, educational level, and financial resources (Figure 2; Table S1). With an increase in  
5 age, the percentage of people with adequate HL for NVS and sufficient HL for HLS-EU-Q16 decreased; the  
6 percentage was similar between the 18–45 and 46–55 year-old age groups (about 30%), it halved in the 56–  
7 65 year-old age group, and it halved again in the over 65 year-old age group. A similar tendency, although  
8 less markedly evident, was observed for those with sufficient HL for HLS-EU-Q16 and low HL for NVS. At the  
9 same time, the percentage of subjects with low HL for both tests increased with increasing age, ranging from  
10 12.2% in the youngest age group to 54.1% in the oldest age group. Regarding education, with an increase in  
11 the education level, there was a decrease in the percentage of people with low HL in both tests. The highest  
12 percentage of subjects with adequate HL at NVS and sufficient HL at HLS-EU-Q16 was in the bachelor's degree  
13 and higher group (35.4%), while the lowest percentage was registered in the high school degree group  
14 (10.4%); the latter education group also presented the lowest percentage of people with sufficient HL at HLS-  
15 EU-Q16 and low HL at NVS (9.1%) and the highest percentage of those with low HL at HLS-EU-Q16 and  
16 adequate HL at NVS (46.8%). Moreover, with the increase in the availability of financial resources, the  
17 percentage of people with adequate HL at NVS and sufficient HL at HLS-EU-Q16 increased, and, at the same  
18 time, the percentage of people with low HL in both tests decreased; in particular, the percentage of people  
19 with low HL in both tests halved, moving from the category “not enough” to “barely enough” (from 70% to  
20 32.1%). Finally, in the more “disadvantaged” groups (elderly people, low educational level, not enough  
21 availability of financial resources), the percentage of people with discordant results regarding the HL level  
22 (i.e., low functional HL and sufficient general HL or vice versa) was lower than that obtained in the other  
23 groups.

24  
25  
26  
27  
28  
29  
30  
31  
32  
33  
34  
35  
36  
37  
38  
39  
40  
41  
42  
43  
44  
45  
46  
47  
48  
49  
50 Considering the results of the multivariate ordinal regression model, all categories of the covariates showed  
51 significant associations with the outcome, with the exception of “high school degree”, with an evident trend.  
52 Moreover, OR values were greater than 3 in most cases (Table 3). In particular, the odds of having high HL  
53 skills were higher as age decreased (OR value from 2.36 for 56–65 years old, to 5.14 for 18–45 years old),  
54 financial resources increased (OR value from 5 for “barely enough” resources, to 8.65 for “more than enough”  
55  
56  
57  
58  
59  
60

resources), and for those with a bachelor's degree or higher (OR = 3.72). Table 4 reported the results of the same analyses conducted considering the level of HL as a dependent variable in accordance with the NVS (I model) and the HLS-EU-Q16 (II model). Considering the first model, functional HL significantly increased as age decreased (for those 46–55 years old: OR = 5.84; for those 18–45 years old: OR = 7.17) and for people with a bachelor's degree or higher (OR = 3.78), while financial resources did not show a predictive role. Regarding the second model, age class, educational level, and financial resources were not significantly associated with general HL.

## Discussion

The aim of the study was to compare two different measures of HL and to evaluate the potential contribution of their joint use in assessing HL antecedents in a population-based sample. Our results showed that NVS and HLS-EU-Q16 led to results that did not completely overlap, as a relevant proportion of the population presented different HL levels when measured with different tools. Furthermore, the antecedents of HL investigated in this study have different weights in predicting NVS or HLS-EU-Q16 results. These results indicate that they measure different aspects of HL; these findings are in line with other studies conducted in other countries<sup>14,43</sup>.

A possible explanation for these findings may lay in the nature of the two HL measurement tools, as the HLS-EU-Q16 is a self-assessed measure for general HL, while NVS is a performance-based measure of reading, understanding, and numeracy skills. In fact, what people think they know does not always correspond to what they actually know: people tend to be overconfident (they think they know more than they actually do) or underconfident (they think they know less than they actually do). Overconfidence and underconfidence are a consequence of the matching between knowledge, confidence, self-efficacy, and emotional distress<sup>43-47</sup>, and they may differ from country to country, as they are also influenced by cultural factors<sup>48,49</sup>.

On the other hand, high skills in reading and understanding health related information (functional HL) do not necessarily imply high critical and interactive competencies (included in general HL), as these are also related

1  
2  
3 to problem-solving skills, life experiences, and empowerment<sup>50,51</sup>. In fact, HL could also act as a balance  
4  
5 between individual skills and the demands and complexities of societal systems<sup>12</sup>. Since it represents the  
6  
7 combination of cognitive capacities, life experiences, knowledge, and opportunities<sup>13,14</sup>, it can be influenced  
8  
9 by the social environment in which it is assessed; this feature should and could be considered to tailor  
10  
11 interventions aimed at increasing its levels.  
12

13  
14 The simultaneous use of the two HL measures highlights the presence of three distinct HL groups in the  
15  
16 population. A first group is represented by the participants with an adequate level of functional and sufficient  
17  
18 general HL; this group has a broader range of HL skills (high HL skills) that can be used to participate actively  
19  
20 in everyday situations, extract health information, and derive meaning from different forms of health  
21  
22 communication. This can be applied to changing circumstances, to exert control over their care, and so  
23  
24 on<sup>52,53</sup>. A second group is represented by the participants that presented with both low functional HL and  
25  
26 low general HL. These subjects lack a wide range of HL skills (low HL skills). Lastly, between these two  
27  
28 opposing conditions, a third group (partial HL skills) is represented by about half of the sample and includes  
29  
30 all the participants that presented with inconsistent HL measurements with low functional HL and sufficient  
31  
32 general HL or vice versa; these people have some HL skills, but lack others.  
33  
34  
35

36  
37 As far as the demographic and socio-economic characteristics of the HL groups defined by the two HL  
38  
39 measures are concerned, it is interesting to note that the more vulnerable population groups (the older, less  
40  
41 educated, and poorer) presented lower levels of discrepancy in the results obtained with the two HL tools,  
42  
43 and in most of cases, these groups presented a low HL level for both measures. On the contrary, the youngest  
44  
45 participants (18–45 years), those with a high school degree and those with enough financial resources  
46  
47 presented the highest percentage of people with partial HL skills low functional HL and sufficient general HL  
48  
49 in most cases. There seems to be a social gradient in accessing, understanding, appraising, and applying  
50  
51 information that is useful for adopting appropriate behaviours in everyday life, and in this sense, HL reflects  
52  
53 the disadvantage suffered by the most deprived people regarding education and wealth.  
54

55  
56 Regarding the combination of the results obtained by applying the two HL measures into a new variable, i.e.,  
57  
58 HL skills, findings showed that the new variable strengthens the association between HL and the investigated  
59  
60



1  
2  
3 antecedents. Indeed, the comparison of the three models of multivariate ordinal logistic regression showed  
4 that age, educational level, and financial resources significantly and independently predict HL skills, with OR  
5 values generally being higher than those observed in the models that consider each single HL measure. These  
6 results suggest that a broader evaluation of HL dimensions—obtained by integrating the NVS and the HLS-  
7 EU-Q16 data—could better represent the real meaning of the complex and hard-to-measure concept of HL.  
8 However, further research is needed to confirm these results and to evaluate whether this approach will also  
9 better predict the association between HL and health-related outcomes.

10  
11 Moreover, as widely described for diagnostic and screening tests<sup>54</sup>, the use of parallel tests (i.e., two tests  
12 administered at the same time followed by subsequent combination of the results) results in an increase in  
13 sensitivity—in this case, the identification of people with low HL skills. For these reasons, the integration of  
14 different HL measures using an approach similar to the one used in this study may help to widen the narrow  
15 view resulting from the use of a single measure and may serve as the basis for the design of a more  
16 comprehensive measurement tool for HL. In this regard, it should be underlined that the approach of  
17 integrating different HL measures is in line with what has been suggested by Pleasant et al.<sup>24</sup> for the definition  
18 of a comprehensive measure of HL: multi-dimensional in content and methodology.

19  
20 This study has several limitations. Some of them are related to the sampling procedure. In particular, one of  
21 the main limitations is that the data cannot be considered representative of the overall Italian or Florentine  
22 adult population since the population-based sample was obtained with a combination of convenience and  
23 probability sampling procedures. For this reason, the generalizability of the results to the entire Florentine  
24 population is limited. In fact, although participants were randomly selected from the registers of the GPs, the  
25 GPs were selected using convenience criteria, which may have introduced a selection bias. Additionally,  
26 results may have been influenced by a non-response bias. Particularly, many of the enrolled people had a  
27 high socio-economic level (45.3% had a bachelor's degree or higher and 17.4% had more than enough  
28 financial resources). These limits could influence an external comparison of the study results, since age,  
29  
30  
31  
32  
33  
34  
35  
36  
37  
38  
39  
40  
41  
42  
43  
44  
45  
46  
47  
48  
49  
50  
51  
52  
53  
54  
55  
56  
57  
58  
59  
60

1  
2  
3 educational level, and financial resources are determinants of HL. Sex was not included in the analysis since,  
4  
5 at the univariate analysis, it was not significantly associated with HL.  
6  
7  
8  
9

10 Other limitations are related to the cut-off values of both the NVS and the HLS-EU-Q16 that were used to  
11  
12 categorize the levels of HL. Although widely-used thresholds were applied, these cut-offs have not been  
13  
14 previously validated for the Italian population, since large population-based studies using the NVS and HLS-  
15  
16 EU-Q16 have not been performed yet. Moreover, some alternatives could have been considered for the  
17  
18 combination of the two variables. In particular, one of them could be the combination of the items of the  
19  
20 two measures into a single scale and assessing the reliability using the classic approach. The chosen  
21  
22 methodology is related to the aim of giving an initial, simple approach for assessing the possibility of  
23  
24 integrating different measures of HL, and this will be refined with future studies.  
25  
26  
27  
28  
29

### 30 **Conclusion**

31  
32  
33  
34 In conclusion, our findings suggest that the combination of the results obtained using a performance-based  
35  
36 measure of functional HL (the NVS) and a self-assessed measure of general HL (HLS-EU-Q16) may improve  
37  
38 the understanding of the HL skills of individuals and populations as well as the relationship between HL and  
39  
40 its antecedents. In addition, the new variable generated by this combination of different HL measures (HL  
41  
42 skills) may help to better identify people with low HL skills and could be considered as a new measure of HL  
43  
44 or, at least, a different way of assessing HL and its multidimensional contents. Although further studies are  
45  
46 needed to confirm our findings and to better define the potential of the combined use of different HL  
47  
48 measures, we think that this paper can be considered to be a starting point for a novel approach to the  
49  
50 investigation of HL, regardless of the limits of this research,.  
51  
52  
53

54 Moreover, the results of our study seem to be in line with the evolution of HL proposed by The Secretary's  
55  
56 Advisory Committee on US National Health Promotion and Disease Prevention Objectives for Healthy People  
57  
58 2030: "Health literacy occurs when a society provides accurate health information and services that people  
59  
60

1  
2  
3 can easily find, understand, and use to inform their decisions and actions.” Nowadays, we should consider  
4  
5 HL to be a type of social competence and responsibility, and we should measure all its facets to make it a  
6  
7 discipline that can contribute to a higher level of clarity, accessibility, and actionability, so as to reduce  
8  
9 inequalities in health<sup>55</sup>.

#### 14 **Funding sources**

16 This research did not receive any specific grant from funding agencies in the public, commercial, or not-for-  
17  
18 profit sectors.

#### 23 **Data availability**

25 The dataset generated and analysed during the current study is available from the corresponding author on  
26  
27 reasonable request.

#### 32 **Ethics approval**

34 The study was approved by the Ethics Committee of the ‘Area Vasta Centro’ (Local Health Unit of Tuscany-  
35  
36 Center, Careggi University Hospital and Meyer University Hospital; Ref. CEAVC: 10113, 01 December 2016).

#### 41 **Author's contribution statement**

43 Chiara Lorini: conception and design of the study; analysis and interpretation of data; drafting and revision  
44  
45 of the manuscript.

47 Vieri Lastrucci: conception and design of the study; generation, collection, assembly and interpretation of  
48  
49 data; drafting and revision of the manuscript.

51 Diana Paolini: conception and design of the study; generation, collection, assembly and interpretation of  
52  
53 data; drafting and revision of the manuscript.

55 Guglielmo Bonaccorsi: conception and design of the study; interpretation of data; drafting and revision of  
56  
57 the manuscript.

1  
2  
3  
4  
5  
6  
7  
8  
9  
10  
11  
12  
13  
14  
15  
16  
17  
18  
19  
20  
21  
22  
23  
24  
25  
26  
27  
28  
29  
30  
31  
32  
33  
34  
35  
36  
37  
38  
39  
40  
41  
42  
43  
44  
45  
46  
47  
48  
49  
50  
51  
52  
53  
54  
55  
56  
57  
58  
59  
60

Other component of the Florence Health Literacy Research Group: conception and design of the study; generation, collection, assembly of data; drafting and revision of the manuscript.

For peer review only

### Conflict of interest statement

The authors declare no conflict of interest

### Figures and Tables

**Figure 1.** Percentage of people with low health literacy by age class (A), educational level (B), and financial resources (C).

**Figure 2.** Percentage of people with regards to the two health literacy measures (HLS-EU-Q16 and NVS) by age class (A), educational level (B), and financial resources (C). For each graph,  $p < 0.05$  (Fisher exact test).

**Table 1.** Descriptive analysis of the collected data (N = 212).

| Variables                                                                                               |                               | N   | %    |
|---------------------------------------------------------------------------------------------------------|-------------------------------|-----|------|
| <b>Age class</b>                                                                                        | 18–45                         | 49  | 23.1 |
|                                                                                                         | 46–55                         | 53  | 25.0 |
|                                                                                                         | 56–65                         | 73  | 34.4 |
|                                                                                                         | >65                           | 37  | 17.5 |
| <b>Educational level</b>                                                                                | Less than high school diploma | 39  | 18.4 |
|                                                                                                         | High school degree            | 77  | 36.3 |
|                                                                                                         | Bachelor's degree and higher  | 96  | 45.3 |
| <b>Financial resources at disposal from own or family income enough to get to the end of the month*</b> | Not enough                    | 10  | 4.7  |
|                                                                                                         | Barely enough                 | 56  | 26.4 |
|                                                                                                         | Enough                        | 108 | 50.9 |
|                                                                                                         | More than enough              | 37  | 17.4 |
| <b>NVS level</b>                                                                                        | High likelihood of limited HL | 22  | 10.4 |
|                                                                                                         | Possibility of limited HL     | 61  | 28.8 |
|                                                                                                         | Adequate HL                   | 129 | 60.8 |
| <b>HLS-EU-Q16 levels</b>                                                                                | Inadequate HL                 | 25  | 11.8 |
|                                                                                                         | Problematic HL                | 117 | 55.2 |
|                                                                                                         | Sufficient HL                 | 70  | 33.0 |

\*1 missing value. HL: health literacy; HLS-EU-Q16: European Health Literacy Survey Questionnaire; NVS:

Newest Vital Sign.

**Table 2.** Level of health literacy considering both measures (NVS and HLS-EU-Q16).

|            |                              | NVS                                          |             | Total      |
|------------|------------------------------|----------------------------------------------|-------------|------------|
|            |                              | High likelihood or possibility of limited HL | Adequate HL |            |
| HLS-EU-Q16 | Inadequate or problematic HL | 60 (28.3%)                                   | 82 (38.7%)  | 142 (67%)  |
|            | Sufficient HL                | 23 (10.8%)                                   | 47 (22.2%)  | 70 (33%)   |
| Total      |                              | 83 (39.1%)                                   | 129 (60.9%) | 212 (100%) |

**Table 3.** Multivariate ordinal logistic regression model (N = 211). Dependent variable: HL skills, obtained combining the results of the two measures (HLS-EU-Q16 and NVS; “low HL skills”, “partial HL skills”, “high HL skills”). OR: Odds Ratio; SE: standard error; CI: Confidence Interval.

| Variables                                                                                              |                               | OR (95%CI)        | P>z    |
|--------------------------------------------------------------------------------------------------------|-------------------------------|-------------------|--------|
| <b>Age class</b>                                                                                       | >65                           | 1                 | -      |
|                                                                                                        | 56-65                         | 2.36 (1.05–5.33)  | 0.038  |
|                                                                                                        | 46-55                         | 4.85 (2.01–11.71) | <0.001 |
|                                                                                                        | 18-45                         | 5.14 (2.10–12.54) | <0.001 |
| <b>Educational level</b>                                                                               | Less than high school diploma | 1                 | -      |
|                                                                                                        | High school degree            | 1.33 (0.59–3.02)  | 0.486  |
|                                                                                                        | Bachelor’s degree and higher  | 3.72 (1.64–8.44)  | 0.002  |
| <b>Financial resources at disposal from own or family income enough to get to the end of the month</b> | Not enough                    | 1                 | -      |
|                                                                                                        | Barely enough                 | 5.50 (1.19–25.36) | 0.029  |
|                                                                                                        | Enough                        | 5.57 (1.26–24.54) | 0.023  |
|                                                                                                        | More than enough              | 8.65 (1.79–41.73) | 0.007  |

LR chi2(10) = 51.38; Prob > chi2 < 0.001; Log likelihood = -193.35519; Pseudo R2 = 0.1173



**Table 4.** Multivariate ordinal logistic regression models (N = 211). In the first model, dependent variable: NVS (three levels); in the second model, dependent variable: HLS-EU-Q16 (three levels). OR: Odds Ratio; SE: standard error; CI: Confidence Interval.

| Variables                                                                                              |                               | I model: NVS as dependent variable* |        | II model: HLS-EU-Q16 as dependent variable° |       |
|--------------------------------------------------------------------------------------------------------|-------------------------------|-------------------------------------|--------|---------------------------------------------|-------|
|                                                                                                        |                               | OR (95%CI)                          | P>z    | OR (95%CI)                                  | P>z   |
| <b>Age class</b>                                                                                       | >65                           | 1                                   | -      | 1                                           | -     |
|                                                                                                        | 56–65                         | 2.13 (0.96–4.70)                    | 0.060  | 1.45 (0.66–3.18)                            | 0.357 |
|                                                                                                        | 46–55                         | 5.84 (2.33–14.65)                   | <0.001 | 1.60 (0.69–3.73)                            | 0.271 |
|                                                                                                        | 18–45                         | 7.17 (2.70–19.04)                   | <0.001 | 1.95 (0.83–4.61)                            | 0.126 |
| <b>Educational level</b>                                                                               | Less than high school diploma | 1                                   | -      | 1                                           | -     |
|                                                                                                        | High school degree            | 1.90 (0.86–4.17)                    | 0.110  | 0.65 (0.30–1.42)                            | 0.285 |
|                                                                                                        | Bachelor's degree and higher  | 3.78 (1.70–8.42)                    | 0.001  | 1.31 (0.62.83)                              | 0.493 |
| <b>Financial resources at disposal from own or family income enough to get to the end of the month</b> | Not enough                    | 1                                   | -      | 1                                           | -     |
|                                                                                                        | Barely enough                 | 1.76 (0.49–6.37)                    | 0.386  | 2.31 (0.61–8.69)                            | 0.215 |
|                                                                                                        | Enough                        | 3.40 (0.97–11.94)                   | 0.057  | 1.87 (0.52–6.71)                            | 0.336 |
|                                                                                                        | More than enough              | 2.91 (0.73–11.64)                   | 0.131  | 3.91 (0.98–15.60)                           | 0.054 |

\* LR  $\chi^2(10) = 50.6$ ; Prob >  $\chi^2 < 0.001$ ; Log likelihood =  $-163.36457$ ; Pseudo R2 = 0.1341

° LR  $\chi^2(10) = 15.64$ ; Prob >  $\chi^2 = 0.0479$ ; Log likelihood =  $-192.14072$ ; Pseudo R2 = 0.0391

## References

1. Kickbusch IS. Health literacy: Addressing the health and education divide. *Health Promot Int* 2001;**16**:289–97. <https://doi.org/10.1093/heapro/16.3.289>.
2. Sørensen K, Van den Broucke S, Fullam J, *et al*. Consortium Health Literacy Project European. Health literacy and public health: a systematic review and integration of definitions and models. *BMC Public Health* 2012;**12**:80. doi: 10.1186/1471-2458-12-80.
3. Van den Broucke S. Health literacy: a critical concept for public health. *Arch Public Health* 2014;**72**: 10. doi: 10.1186/2049-3258-72-10.
4. Freebody P, Luke A. 'Literacies' programs: debates and demands in cultural context. *Prospect* 1990;**5**: 7-16.
5. Kickbusch I, Pelikan LM, Apfel F, *et al*. *Health literacy. The solid facts*. Copenhagen: World Health Organisation Regional Office for Europe, 2013.
6. Kobayashi L, Wardle J, Wolf MS, *et al*. Aging and functional health literacy: a systematic review and meta-analysis. *J Gerontol B Psychol Sci Soc Sci* 2016;**71**:445-57. doi: 10.1093/geronb/gbu161.
7. Bonaccorsi G, Lastrucci V, Vettori V, *et al*. Functional Health Literacy in a population-based sample in Florence: an assessment using the Newest Vital Sign. *BMJ Open* 2019;**9**:e026356. doi: 10.1136/bmjopen-2018-026356.
8. Adams RJ, Appleton SL, Hill CL, *et al*. Risks associated with low functional health literacy in an Australian population. *Med J Aust* 2009;**191**:530–4.
9. Stormacq C, Van den Broucke S, Wosinski J. Does health literacy mediate the relationship between socioeconomic status and health disparities? Integrative review. *Health Promot Int* 2018. doi: 10.1093/heapro/day062.
10. Pelikan JM, Ganahl K, Roethlin F. Health literacy as a determinant, mediator and/or moderator of health: empirical models using the European Health Literacy Survey dataset. *Glob Health Promot* 2018;**25**:57-66. doi: 10.1177/1757975918788300.

- 1  
2  
3 11. Lastrucci V, Lorini C, Caini S, *et al*. Health literacy as a mediator of the relationship between  
4 socioeconomic status and health: A cross-sectional study in a population-based sample in Florence.  
5  
6 *PLoS One* 2019;**14**(12):e0227007. doi: 10.1371/journal.pone.0227007.  
7  
8
- 9  
10 12. Parker R. Measuring health literacy: What? So what? Now what. In: *Measures of health literacy:*  
11  
12 *workshop summary*. Washington, DC: National Academies Press, 2009.  
13
- 14 13. Levin-Zamir D, Leung AYM, Dodson S, Rowlands G. Health Literacy in Selected Populations:  
15  
16 Individuals, Families, and Communities From the International and Cultural Perspective. *Stud Health*  
17  
18 *Technol Inform* 2017;**240**:392-414.  
19
- 20 14. HLS-EU Consortium. Comparative report on health literacy in eight EU member states. The European  
21  
22 health literacy survey HLS-  
23  
24 EU. 2012 [http://ec.europa.eu/chafea/documents/news/Comparative\\_report\\_on\\_health\\_literacy\\_i](http://ec.europa.eu/chafea/documents/news/Comparative_report_on_health_literacy_in_eight_EU_member_states.pdf)  
25  
26 [n\\_eight\\_EU\\_member\\_states.pdf](http://ec.europa.eu/chafea/documents/news/Comparative_report_on_health_literacy_in_eight_EU_member_states.pdf)  
27  
28
- 29 15. Nguyen TH, Paasche-Orlow MK, McCormack LA. The state of the science of health literacy  
30  
31 measurement. *Stud Health Technol Inform* 2017;**240**:17-33. doi: 10.3233/ISU-170827.  
32  
33
- 34 16. Altin SV, Finke I, Kautz-Freimuth S, Stock S. The evolution of health literacy assessment tools: a  
35  
36 systematic review. *BMC Public Health* 2014;**14**:1207. doi: 10.1186/1471-2458-14-1207.  
37  
38
- 39 17. Haun JN, Valerio MA, McCormack LA, *et al*. Health literacy measurement: an inventory and  
40  
41 descriptive summary of 51 instruments. *J Health Commun* 2014;**19**:302-33. doi:  
42  
43 10.1080/10810730.2014.936571.  
44
- 45 18. Jordan JE, Osborne RH, Buchbinder R. Critical appraisal of health literacy indices revealed variable  
46  
47 underlying constructs, narrow content and psychometric weaknesses. *J Clin Epidemiol* 2011;**64**:366-  
48  
49 79. doi: 10.1016/j.jclinepi.2010.04.005.  
50  
51
- 52 19. Kiechle ES, Bailey SC, Hedlund LA, *et al*. Different measures, different outcomes? A systematic review  
53  
54 of performance-based versus self-reported measures of health literacy and numeracy. *J Gen Intern*  
55  
56 *Med* 2015;**30**:1538-46. doi: 10.1007/s11606-015-3288-4.  
57  
58  
59  
60

- 1  
2  
3 20. Marciano L, Camerini AL, Schulz PJ. The role of health literacy in diabetes knowledge, self-care, and  
4  
5 glycemic control: a meta-analysis. *J Gen Intern Med* 2019;**34**:1007-17. doi: 10.1007/s11606-019-  
6  
7 04832-y.  
8  
9  
10 21. Malloy-Weir L, Cooper M. Health literacy, literacy, numeracy and nutrition label understanding and  
11  
12 use: a scoping review of the literature. *J Hum Nutr Diet* 2017;**30**:309-25. doi: 10.1111/jhn.12428.  
13  
14 22. Lorini C, Santomauro F, Donzellini M, *et al.* Health literacy and vaccination: a systematic review. *Hum*  
15  
16 *Vaccin Immunother* 2018;**14**:478-88. doi: 10.1080/21645515.2017.  
17  
18 23. Griffin JM, Partin MR, Noorbaloochi S, *et al.* Variation in estimates of limited health literacy by  
19  
20 assessment instruments and non-response bias. *J Gen Intern Med* 2010;**27**:675-81. doi:  
21  
22 10.1007/s11606-010-1304-2.  
23  
24 24. Pleasant A, McKinney J, Rikard RV. Health Literacy measurement: a proposed research agenda. *J*  
25  
26 *Health Commun* 2011;**16**:11-21. doi: 10.1080/10810730.2011.604392.  
27  
28 25. McCormack L, Haun J, Sørensen K, *et al.* Recommendations for advancing health literacy  
29  
30 measurement. *J Health Commun* 2013;**18**:9-14. doi: 10.1080/10810730.2013.829892.  
31  
32 26. Almaleh R, Helmy Y, Farhat E, *et al.* Assessment of health literacy among outpatient clinics attendees  
33  
34 at Ain Shams University Hospitals. Egypt: a cross-sectional study. *Public Health* 2017;**151**:137-45. doi:  
35  
36 10.1016/j.puhe.2017.06.024.  
37  
38 27. Pelikan JM, Ganahl K. Measuring health literacy in general populations: primary findings from the  
39  
40 HLS-EU Consortium's Health Literacy Assessment Effort. *Stud Health Technol Inf* 2017;**240**:34-59. doi:  
41  
42 10.3233/978-1-61499-790-0-34.  
43  
44 28. Waters EA, Biddle C, Kaphingst KA, *et al.* Examining the interrelations among objective and subjective  
45  
46 health literacy and numeracy and their associations with health knowledge. *J Gen Intern Med*  
47  
48 2018;**33**:1945-53. doi: 10.1007/s11606-018-4624-2.  
49  
50 29. Lorini C, Santomauro F, Grazzini M, *et al.* Health literacy in Italy: a cross-sectional study protocol to  
51  
52 assess the health literacy level in a population-based sample and to validate health literacy measures  
53  
54 in the Italian language. *BMJ Open* 2017;**7**: 017812. doi: 10.1136/bmjopen-2017-017812.  
55  
56  
57  
58  
59  
60

- 1  
2  
3 30. Lorini C, Lastrucci V, Mantwill S, *et al.* Measuring health literacy in Italy: a validation study of the HLS-  
4 EU-Q16 and of the HLS-EU-Q6 in Italian language, conducted in Florence and its surroundings. *Ann*  
5 *Ist Super Sanita* 2019;**55**:10-8. doi: 10.4415/ANN\_19\_01\_04.  
6  
7  
8  
9  
10 31. Bechini A, Pieralli F, Chellini E, *et al.* Application of socio-economic-health deprivation index, analysis  
11 of mortality and influenza vaccination coverage in the elderly population of Tuscany. *J Prev Med Hyg*  
12 2019;**59**(4 Suppl 2): E18–E25. <https://doi.org/10.15167/2421-4248/jpmh2018.59.4s2.1116>  
13  
14  
15  
16 32. Unim B, De Vito C, Massimi A, *et al.* The need to improve implementation and use of lifestyle  
17 surveillance systems for planning prevention activities: an analysis of the Italian Regions. *Public*  
18 *health* 2016;**130**:51-58.  
19  
20  
21  
22  
23 33. Minardi V, Ferrante G, D’Argenio P, *et al.* Roll-your-own cigarette use in Italy: sales and consumer  
24 profile—data from PASSI surveillance, 2015–2016. *Int J Public Health* 2019;**64**(3): 423-430.  
25  
26  
27  
28 34. Capecchi L, Guazzini A, Lorini C, *et al.* The first Italian validation of the most widespread health literacy  
29 assessment tool: the Newest Vital Sign. *Epidemiol Prev* 2015;**39**: 124–8.  
30  
31  
32 35. Bonaccorsi G, Pieralli F, Innocenti M, *et al.* Non-familial paid caregivers as potential flu carriers and  
33 cause of spread: the primary prevention of flu measured through their adhesion to flu vaccination  
34 campaigns - A Florentine experience. *Hum Vaccin Immunother* 2019;**2**:1-7. doi:  
35 10.1080/21645515.2019.1593726.  
36  
37  
38  
39  
40 36. Bonaccorsi G, Grazzini M, Pieri L, *et al.* Assessment of Health Literacy and validation of single-item  
41 literacy screener (SILS) in a sample of Italian people. *Ann Ist Super Sanita* 2017;**53**:205–12. doi:  
42 10.4415/ANN\_17\_03\_05.  
43  
44  
45  
46  
47 37. Weiss BD, Mays MZ, Martz W, *et al.* Quick Assessment of Literacy in Primary Care: The Newest Vital  
48 Sign. *Ann Fam Med* 2005;**3**(6):514-22.  
49  
50  
51  
52 38. Sørensen K, Pelikan JM, Röthlin F, *et al.* Health literacy in Europe: comparative results of the  
53 European health literacy survey (HLS-EU). *Eur J Public Health* 2015;**25**:1053-8. doi:  
54 10.1093/eurpub/ckv043.  
55  
56  
57  
58  
59  
60

- 1  
2  
3 39. Sørensen K, Van den Broucke S, Pelikan JM, *et al.* Measuring health literacy in populations:  
4  
5 illuminating the design and development process of the European Health Literacy Survey  
6  
7 Questionnaire (HLS-EU-Q). *BMC Public Health* 2013;**13**: 948. doi: 10.1186/1471-2458-13-948.  
8  
9
- 10 40. Halbach SM, Ernstmann N, Kowalski C, *et al.* Unmet information needs and limited health literacy in  
11  
12 newly diagnosed breast cancer patients over the course of cancer treatment. *Patient Educ Couns*  
13  
14 2016;**99**:1511-18. doi: 10.1016/j.pec.2016.06.028.  
15
- 16 41. Pelikan JM, Ganahl K. Measuring health literacy in general populations: primary findings from the  
17  
18 HLS-EU Consortium's health literacy assessment effort. *Stud Health Technol Inform* 2017;**240**:34-59.  
19
- 20 42. Koletsi D, Pandis N. Ordinal logistic regression. *Am J Orthod Dentofacial Orthop* 2018;**153**:157-8. doi:  
21  
22 10.1016/j.ajodo.2017.11.011.  
23
- 24 43. Fransen MP, Leenaars KE, Rowlands G, *et al.* International application of health literacy measures:  
25  
26 adaptation and validation of the newest vital sign in The Netherlands. *Patient Educ Couns*  
27  
28 2014;**97**:403-9. doi: 10.1016/j.pec.2014.08.017.  
29
- 30 44. Alba JW. Knowledge calibration what consumers know and what they think they know. *J Consum Res*  
31  
32 2000;**72**:123-65. <https://doi.org/10.1086/314317>.  
33
- 34 45. Carlson JP, Vincent LH, Hardesty DM, *et al.* Objective and subjective knowledge relationships: a  
35  
36 quantitative analysis of consumer research findings. *J Consum Res* 2009;**35**:864-76.  
37  
38 <https://doi.org/10.1086/593688>.  
39
- 40 46. Pieniak S, Aertsens J, Verbeke W. Subjective and objective knowledge as determinants of organic  
41  
42 vegetables consumption. *Food Qual Preference* 2010;**21**:581-88.  
43  
44 <https://doi.org/10.1016/j.foodqual.2010.03.004>.  
45
- 46 47. Schinckus L, Dangoisse F, Van den Broucke S, *et al.* When knowing is not enough: emotional distress  
47  
48 and depression reduce the positive effects of health literacy on diabetes self-management. *Patient*  
49  
50 *Educ Couns* 2018;**101**:324-30. doi: 10.1016/j.pec.2017.08.006.  
51  
52  
53  
54  
55  
56  
57  
58  
59  
60

- 1  
2  
3 48. Stolp S, Zabucky KM. Contributions of metacognitive and self-regulated learning theories to  
4 investigations of calibration of comprehension. *International Electronic Journal of Elementary*  
5 *Education* 2017;**2**:7-31.  
6  
7  
8  
9  
10 49. Belmi P, Neale MA, Reiff D. *et al.* The social advantage of miscalibrated individuals: the relationship  
11 between social class and overconfidence and its implications for class-based inequality. *J Pers Soc*  
12 *Psychol* (2019). doi: 10.1037/pspi0000187  
13  
14  
15  
16 50. Crondahl K, Karlsson LE. The nexus between health literacy and empowerment: a scoping review.  
17 *Sage Open* 2016;**6**:1-7. <https://doi.org/10.1177/2158244016646410>  
18  
19  
20  
21 51. Nutbeam D. Health literacy as a public health goal: a challenge for contemporary health education  
22 and communication strategies into the 21<sup>st</sup> century. *Health Prom Intern* 2000;**15**:259-67.  
23 <https://doi.org/10.1093/heapro/15.3.259>.  
24  
25  
26  
27 52. Chinn D. Critical health literacy: a review and critical analysis. *Soc Sci Med* 2011;**73**:60-7. doi:  
28 10.1016/j.socscimed.2011.04.004.  
29  
30  
31  
32 53. Van der Heide I, Heijmans M, Schuit AJ, *et al.* Functional, interactive and critical health literacy:  
33 varying relationships with control over care and number of GP visits. *Patient Educ Couns*  
34 2015;**98**:998-1004. doi: 10.1016/j.pec.2015.04.006.  
35  
36  
37  
38 54. Fletcher RH, Fletcher SH, Fletcher Grant S. Clinical epidemiology: the essentials, fifth ed., Lippincott  
39 Williams & Wilkins, Philadelphia 2012.  
40  
41  
42  
43 55. United States Government, Office of Disease Prevention and Health Promotion, Office of the  
44 Assistant Secretary for Health, Office of the Secretary, Department of Health and Human Services.  
45 Solicitation for Written Comments on an Updated Health Literacy Definition for Healthy People 2030.  
46 Available at: [https://www.federalregister.gov/documents/2019/06/04/2019-11571/solicitation-for-](https://www.federalregister.gov/documents/2019/06/04/2019-11571/solicitation-for-written-comments-on-an-updated-health-literacy-definition-for-healthy-people-2030)  
47 [written-comments-on-an-updated-health-literacy-definition-for-healthy-people-2030](https://www.federalregister.gov/documents/2019/06/04/2019-11571/solicitation-for-written-comments-on-an-updated-health-literacy-definition-for-healthy-people-2030).  
48  
49  
50  
51  
52  
53  
54  
55  
56  
57  
58  
59  
60

### Low Health Literacy by age class (%)

1  
2  
3  
4  
5  
6  
7  
8  
9  
10  
11  
12  
13  
14  
15  
16  
17  
18  
19

**A**

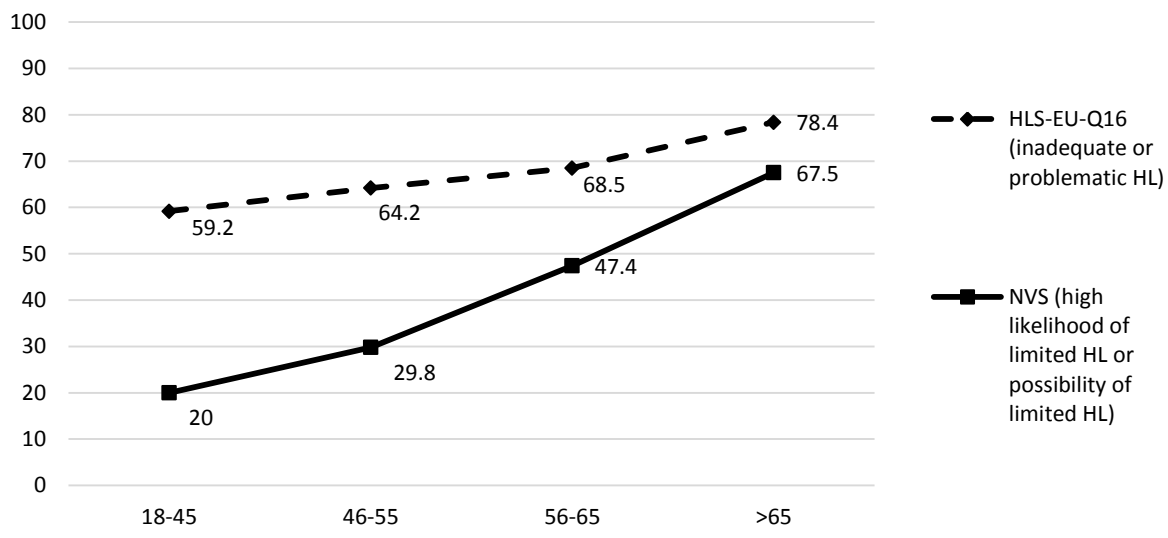

### Low Health Literacy by educational level (%)

20  
21  
22  
23  
24  
25  
26  
27  
28  
29  
30  
31  
32  
33  
34  
35  
36  
37

**B**

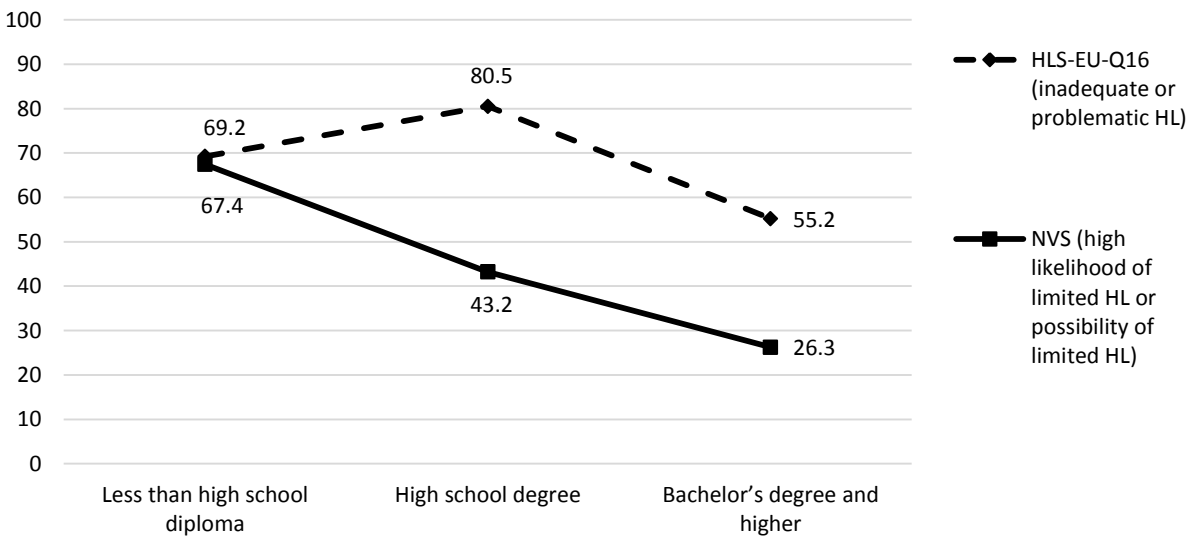

### Low Health Literacy by Financial resources (%)

38  
39  
40  
41  
42  
43  
44  
45  
46  
47  
48  
49  
50  
51  
52  
53  
54  
55  
56

**C**

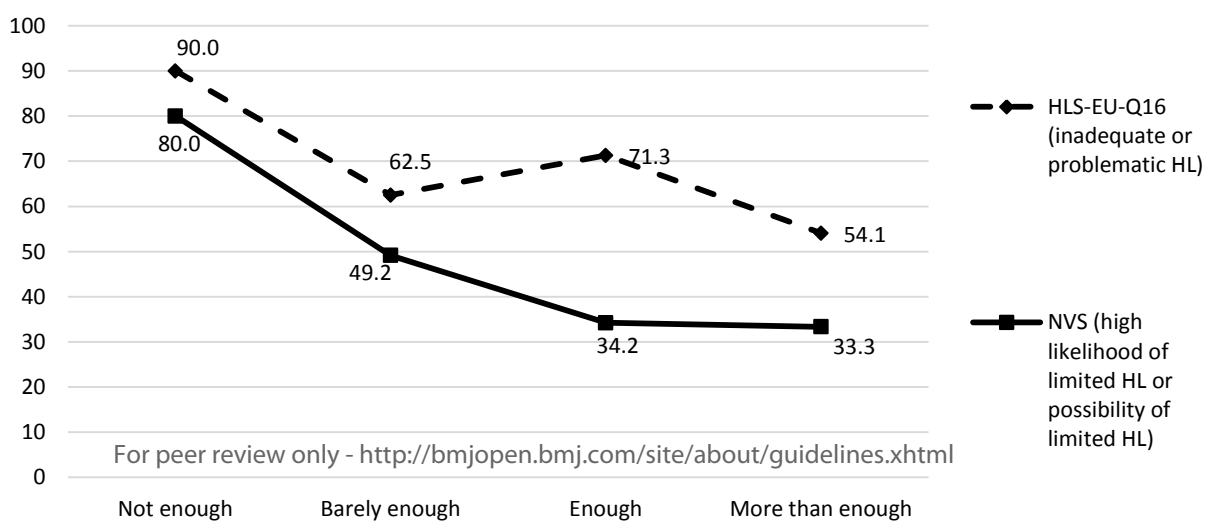





**Table S1.** Percentage of people with regards to the two health literacy measures (HLS-EU-Q16 and NVS) by age class, educational level, and financial resources.

CI= Confidence Interval.

| Variables                                                                                              |                               | HL level                              |                                               |                                                 |                                                      |
|--------------------------------------------------------------------------------------------------------|-------------------------------|---------------------------------------|-----------------------------------------------|-------------------------------------------------|------------------------------------------------------|
|                                                                                                        |                               | Raw percentage (95% CI)               |                                               |                                                 |                                                      |
|                                                                                                        |                               | low for both HLS and NVS (concordant) | low for HLS and adequate for NVS (discordant) | sufficient for HLS and low for NVS (discordant) | sufficient for HLS and adequate for NVS (concordant) |
| <b>Age</b>                                                                                             | ≤45                           | 12.2% (4.6–24.8%)                     | 46.9% (32.5–61.7%)                            | 8.2% (2.3–19.6%)                                | 32.7% (19.0–47.5%)                                   |
|                                                                                                        | 46–55                         | 18.9% (9.4–32%)                       | 45.3% (31.6–59.6%)                            | 5.7% (1.2–15.7%)                                | 30.2% (18.3–44.3%)                                   |
|                                                                                                        | 56–65                         | 32.9% (22.3–44.9%)                    | 35.6% (24.7–47.7%)                            | 15.1% (7.8–25.4%)                               | 16.4% (8.8–27.0%)                                    |
|                                                                                                        | >65                           | 54.1% (36.9–70.5%)                    | 24.3% (11.8–41.2%)                            | 13.5% (4.5–28.8%)                               | 8.1% (1.7–21.9%)                                     |
| <b>Educational level</b>                                                                               | Less than high school diploma | 48.7% (32.4–65.2%)                    | 20.5% (9.3–36.5%)                             | 17.9% (7.5–33.5%)                               | 12.8% (4.3–27.4%)                                    |
|                                                                                                        | High school degree            | 33.8% (23.4–45.4%)                    | 46.8% (35.3–58.5%)                            | 9.1% (3.7–17.8%)                                | 10.4% (4.6–19.4%)                                    |
|                                                                                                        | Bachelor's degree and higher  | 15.6% (9–24.5%)                       | 39.6% (29.7–50.1%)                            | 9.4% (4.4–17.1%)                                | 35.4% (25.9–45.8%)                                   |
| <b>Financial resources at disposal from own or family income enough to get to the end of the month</b> | Not enough                    | 70.0% (34.8–93.3%)                    | 20.0% (2.5–55.6%)                             | 10.0% (0.3–44.5%)                               | 0% (0–30.8%)                                         |
|                                                                                                        | Barely enough                 | 32.1% (20.3–40%)                      | 30.4% (18.8–44.1%)                            | 16.1% (7.6–28.3)                                | 21.4% (11.6–34.4%)                                   |
|                                                                                                        | Enough                        | 25.0% (17.2–34.3%)                    | 46.3% (36.7–56.2%)                            | 7.4% (3.3–14.1%)                                | 21.3% (14–30.2%)                                     |
|                                                                                                        | More than enough              | 18.9% (8–35.2%)                       | 35.1% (20.2–52.5%)                            | 13.5% (4.5–28.8%)                               | 32.4% (18–49.8%)                                     |

**STROBE 2007 (v4) Statement—Checklist of items that should be included in reports of *cross-sectional studies***

| Section/Topic                | Item # | Recommendation                                                                                                                                                                       | Reported on page # |
|------------------------------|--------|--------------------------------------------------------------------------------------------------------------------------------------------------------------------------------------|--------------------|
| <b>Title and abstract</b>    | 1      | (a) Indicate the study's design with a commonly used term in the title or the abstract                                                                                               |                    |
|                              |        | (b) Provide in the abstract an informative and balanced summary of what was done and what was found                                                                                  | 2                  |
| <b>Introduction</b>          |        |                                                                                                                                                                                      |                    |
| Background/rationale         | 2      | Explain the scientific background and rationale for the investigation being reported                                                                                                 | 4; 5               |
| Objectives                   | 3      | State specific objectives, including any prespecified hypotheses                                                                                                                     | 5                  |
| <b>Methods</b>               |        |                                                                                                                                                                                      |                    |
| Study design                 | 4      | Present key elements of study design early in the paper                                                                                                                              | 6                  |
| Setting                      | 5      | Describe the setting, locations, and relevant dates, including periods of recruitment, exposure, follow-up, and data collection                                                      | 6                  |
| Participants                 | 6      | (a) Give the eligibility criteria, and the sources and methods of selection of participants                                                                                          | 6                  |
| Variables                    | 7      | Clearly define all outcomes, exposures, predictors, potential confounders, and effect modifiers. Give diagnostic criteria, if applicable                                             | 6; 7; 8            |
| Data sources/<br>measurement | 8*     | For each variable of interest, give sources of data and details of methods of assessment (measurement). Describe comparability of assessment methods if there is more than one group | 6;7; 8             |
| Bias                         | 9      | Describe any efforts to address potential sources of bias                                                                                                                            | 8                  |
| Study size                   | 10     | Explain how the study size was arrived at                                                                                                                                            | 5;6                |
| Quantitative variables       | 11     | Explain how quantitative variables were handled in the analyses. If applicable, describe which groupings were chosen and why                                                         | 8                  |
| Statistical methods          | 12     | (a) Describe all statistical methods, including those used to control for confounding                                                                                                | 8                  |
|                              |        | (b) Describe any methods used to examine subgroups and interactions                                                                                                                  | 8                  |
|                              |        | (c) Explain how missing data were addressed                                                                                                                                          |                    |
|                              |        | (d) If applicable, describe analytical methods taking account of sampling strategy                                                                                                   |                    |
|                              |        | (e) Describe any sensitivity analyses                                                                                                                                                |                    |
| <b>Results</b>               |        |                                                                                                                                                                                      |                    |

|                          |     |                                                                                                                                                                                                              |                |
|--------------------------|-----|--------------------------------------------------------------------------------------------------------------------------------------------------------------------------------------------------------------|----------------|
| Participants             | 13* | (a) Report numbers of individuals at each stage of study—eg numbers potentially eligible, examined for eligibility, confirmed eligible, included in the study, completing follow-up, and analysed            | 9              |
|                          |     | (b) Give reasons for non-participation at each stage                                                                                                                                                         | 9              |
|                          |     | (c) Consider use of a flow diagram                                                                                                                                                                           |                |
| Descriptive data         | 14* | (a) Give characteristics of study participants (eg demographic, clinical, social) and information on exposures and potential confounders                                                                     | 9; 10          |
|                          |     | (b) Indicate number of participants with missing data for each variable of interest                                                                                                                          | 17             |
| Outcome data             | 15* | Report numbers of outcome events or summary measures                                                                                                                                                         | 9; 10; 11      |
| Main results             | 16  | (a) Give unadjusted estimates and, if applicable, confounder-adjusted estimates and their precision (eg, 95% confidence interval). Make clear which confounders were adjusted for and why they were included | 19;20          |
|                          |     | (b) Report category boundaries when continuous variables were categorized                                                                                                                                    | 17; 18; 19; 20 |
|                          |     | (c) If relevant, consider translating estimates of relative risk into absolute risk for a meaningful time period                                                                                             |                |
| Other analyses           | 17  | Report other analyses done—eg analyses of subgroups and interactions, and sensitivity analyses                                                                                                               |                |
| <b>Discussion</b>        |     |                                                                                                                                                                                                              |                |
| Key results              | 18  | Summarise key results with reference to study objectives                                                                                                                                                     | 11             |
| Limitations              | 19  | Discuss limitations of the study, taking into account sources of potential bias or imprecision. Discuss both direction and magnitude of any potential bias                                                   | 13             |
| Interpretation           | 20  | Give a cautious overall interpretation of results considering objectives, limitations, multiplicity of analyses, results from similar studies, and other relevant evidence                                   | 12; 13         |
| Generalisability         | 21  | Discuss the generalisability (external validity) of the study results                                                                                                                                        | 12; 13         |
| <b>Other information</b> |     |                                                                                                                                                                                                              |                |
| Funding                  | 22  | Give the source of funding and the role of the funders for the present study and, if applicable, for the original study on which the present article is based                                                | 14             |

\*Give information separately for cases and controls in case-control studies and, if applicable, for exposed and unexposed groups in cohort and cross-sectional studies.

**Note:** An Explanation and Elaboration article discusses each checklist item and gives methodological background and published examples of transparent reporting. The STROBE checklist is best used in conjunction with this article (freely available on the Web sites of PLoS Medicine at <http://www.plosmedicine.org/>, Annals of Internal Medicine at <http://www.annals.org/>, and Epidemiology at <http://www.epidem.com/>). Information on the STROBE Initiative is available at [www.strobe-statement.org](http://www.strobe-statement.org).

# BMJ Open

**Measuring health literacy combining by performance-based and self-assessed measures.  
The roles of age, educational level, and financial resources in predicting health literacy skills: a cross-sectional study conducted in Florence (Italy)**

|                                 |                                                                                                                                                                                                                                                                                                                                                                                                                     |
|---------------------------------|---------------------------------------------------------------------------------------------------------------------------------------------------------------------------------------------------------------------------------------------------------------------------------------------------------------------------------------------------------------------------------------------------------------------|
| Journal:                        | <i>BMJ Open</i>                                                                                                                                                                                                                                                                                                                                                                                                     |
| Manuscript ID                   | bmjopen-2019-035987.R2                                                                                                                                                                                                                                                                                                                                                                                              |
| Article Type:                   | Original research                                                                                                                                                                                                                                                                                                                                                                                                   |
| Date Submitted by the Author:   | 27-Jul-2020                                                                                                                                                                                                                                                                                                                                                                                                         |
| Complete List of Authors:       | Lorini, Chiara; University of Florence, Department of Health Sciences<br>Lastrucci, Vieri; University of Florence, Department of Health Sciences<br>Paolini, Diana; University of Florence, Department of Health Sciences<br>Research Group, Florence Health Literacy ; University of Florence,<br>Department of Health Sciences<br>Bonaccorsi, Guglielmo; University of Florence, Department of Health<br>Sciences |
| <b>Primary Subject Heading</b>: | Public health                                                                                                                                                                                                                                                                                                                                                                                                       |
| Secondary Subject Heading:      | Research methods                                                                                                                                                                                                                                                                                                                                                                                                    |
| Keywords:                       | PUBLIC HEALTH, PREVENTIVE MEDICINE, STATISTICS & RESEARCH METHODS                                                                                                                                                                                                                                                                                                                                                   |
|                                 |                                                                                                                                                                                                                                                                                                                                                                                                                     |

SCHOLARONE™  
Manuscripts



I, the Submitting Author has the right to grant and does grant on behalf of all authors of the Work (as defined in the below author licence), an exclusive licence and/or a non-exclusive licence for contributions from authors who are: i) UK Crown employees; ii) where BMJ has agreed a CC-BY licence shall apply, and/or iii) in accordance with the terms applicable for US Federal Government officers or employees acting as part of their official duties; on a worldwide, perpetual, irrevocable, royalty-free basis to BMJ Publishing Group Ltd ("BMJ") its licensees and where the relevant Journal is co-owned by BMJ to the co-owners of the Journal, to publish the Work in this journal and any other BMJ products and to exploit all rights, as set out in our [licence](#).

The Submitting Author accepts and understands that any supply made under these terms is made by BMJ to the Submitting Author unless you are acting as an employee on behalf of your employer or a postgraduate student of an affiliated institution which is paying any applicable article publishing charge ("APC") for Open Access articles. Where the Submitting Author wishes to make the Work available on an Open Access basis (and intends to pay the relevant APC), the terms of reuse of such Open Access shall be governed by a Creative Commons licence – details of these licences and which [Creative Commons](#) licence will apply to this Work are set out in our licence referred to above.

Other than as permitted in any relevant BMJ Author's Self Archiving Policies, I confirm this Work has not been accepted for publication elsewhere, is not being considered for publication elsewhere and does not duplicate material already published. I confirm all authors consent to publication of this Work and authorise the granting of this licence.

## Measuring health literacy combining by performance-based and self-assessed measures.

### The roles of age, educational level, and financial resources in predicting health literacy skills: a cross-sectional study conducted in Florence (Italy)

Chiara Lorini<sup>1</sup>, Vieri Lastrucci<sup>1\*</sup>, Diana Paolini<sup>1</sup>, Florence Health Literacy Research Group<sup>^</sup>, Guglielmo Bonaccorsi<sup>1</sup>

<sup>^</sup>Florence Health Literacy Research Group: Elisabetta Alti<sup>3</sup>, Sergio Baglioni<sup>3</sup>, Leonardo Bellino<sup>3</sup>, Niccolò Berzi<sup>3</sup>, Jacopo Bianchi<sup>4</sup>, Guglielmo Bonaccorsi<sup>1</sup>, Giuseppe Burgio<sup>3</sup>, Alessandro Bussotti<sup>5</sup>, Marco Del Riccio<sup>1</sup>, Martina Donzellini<sup>4</sup>, Angela Galdiero<sup>6</sup>, Alessandro Grassi<sup>3</sup>, Tommaso Grassi<sup>4</sup>, Vieri Lastrucci<sup>1</sup>, Arrigo Lombardi<sup>3</sup>, Chiara Lorini<sup>1</sup>, Sarah Mantwill<sup>2</sup>, Federico Manzi<sup>4</sup>, Alessandro Mereu<sup>3</sup>, Donatella Messina<sup>3</sup>, Chiara Milani<sup>4</sup>, Diana Paolini<sup>1</sup>, Marco Targonato<sup>3</sup>, Marco Toccafondi<sup>3</sup>, Gino Sartor<sup>4</sup>, Virginia Vettori<sup>1</sup>

1. Department of Health Science, University of Florence, Florence, Italy
2. Department of Health Sciences & Health Policy, University of Lucerne, Lucerne, Switzerland
3. General Practitioner, Local Health Unit - Toscana Centro, Italy
4. School of Specialization in Hygiene and Preventive Medicine, University of Florence, Florence, Italy
5. Careggi University Hospital, Florence, Italy
6. Local Health Unit - Toscana Centro, Italy

\*Corresponding author:

Vieri Lastrucci; e-mail: [vieri.lastrucci@gmail.com](mailto:vieri.lastrucci@gmail.com); Postal address: Viale Morgagni, 48, 50134 Firenze, Italy

1  
2  
3  
4  
5  
6  
7  
8  
9  
10  
11  
12  
13  
14  
15  
16  
17  
18  
19  
20  
21  
22  
23  
24  
25  
26  
27  
28  
29  
30  
31  
32  
33  
34  
35  
36  
37  
38  
39  
40  
41  
42  
43  
44  
45  
46  
47  
48  
49  
50  
51  
52  
53  
54  
55  
56  
57  
58  
59  
60**Abstract***Objective*

The objective was to compare the results of performance-based and self-assessed measures of health literacy (HL) and to evaluate the contribution of their joint use in assessing some HL antecedents.

*Design*

This was a cross-sectional study.

*Setting*

The study was conducted on the general population in Florence (Italy).

*Participants*

This study is part of a larger one, where participants were randomly selected from the registries of eleven general practitioners (GPs) working in the municipality of Florence. Inclusion criteria were the following: 18-69 years of age and Italian speaking. Exclusion criteria included cognitive impairment, severe psychiatric disease, or end-stage disease. In this paper, 212 adults were included.

*Outcome measures*

HL was measured using the European Health Literacy Survey Questionnaire (HLS-EU-Q16) and the Newest Vital Sign (NVS). The HL levels obtained by means of the two measurement tools were combined into a new variable that described three different levels of HL skills: low HL skills, partial HL skills, and high HL skills. Multivariate ordinal logistic regression analysis was performed to assess the predictive roles of age class, educational level, and financial resources with respect to HL skills.

*Results*

Twenty-two percent of the sample had high HL skills, 28.3% had low HL skills, and 49.5% had partial HL skills. Educational level, age class and financial resources were significantly associated with HL skills, with OR values being higher than those obtained using the NVS or the HLS-EU-Q16 individually.

*Conclusion*



1  
2  
3 The combination of the results obtained using the NVS and the HLS-EU-Q16 improves the understanding of  
4  
5 HL. The new variable generated by this combination could be considered as a different way to assess HL and  
6  
7 its multidimensional contents.  
8  
9

### 10 11 12 **Strengths and limitations of this study** 13 14 15 16

- 17 • In this study, for the first time, two different measures of health literacy (HL) were combined into a  
18 new measure, called “HL skills”.
  - 19 • The study design (sampling procedure, criteria for the combination of the HL measures) led to  
20 limitations in the generalizability of the results.
  - 21 • A different approach in combining the two measures could have led to different results.
- 22  
23  
24  
25  
26  
27  
28  
29  
30  
31  
32  
33  
34  
35  
36  
37  
38  
39  
40  
41  
42  
43  
44  
45  
46  
47  
48  
49  
50  
51  
52  
53  
54  
55  
56  
57  
58  
59  
60

## Introduction

Health literacy (HL) is a multidimensional concept<sup>1</sup> that deals with broader competences that are needed to communicate, navigate, and actively participate within modern health care systems and, more generally, with an individual's capacity to assess, understand, and use health information in different settings<sup>2,3</sup>. The skills that compose HL can be classified into three different typologies: the practical application of literacy skills ranging from those needed to be able to function effectively in everyday situations (functional); the cognitive and literacy skills that can be used to actively participate in everyday activities and to apply new information to changing circumstances (interactive); and cognitive skills that can be applied to critically analyse information and exert greater control over life events and situations (critical literacy)<sup>4</sup>. All of these competences enable a person to navigate within three domains: healthcare, disease prevention, and health promotion<sup>2</sup>. For these reasons, HL affects people's health, and it is now considered as one of the main determinants of health inequality; it is significantly related to age, educational level, and economic status<sup>5-8</sup> and is suggested to partially mediate the effect of socioeconomic status on health-related outcomes<sup>9,10,11</sup>. Moreover, HL can also be considered as the balance between individual skills and the demands and complexities of societal systems<sup>12</sup>; it is the combination of cognitive capacities, life experiences, knowledge, and opportunities<sup>13,14</sup>.

To date, several different definitions of HL have been proposed in the literature; as a result, a considerable number of HL measurement tools have been developed by now. Although this variety of measures permits the use of specific tools for specific aims and target groups, it rises debate and poses some challenges. Indeed, more than 150 measures exist, but no "gold standard" measure has emerged until now. Furthermore, only a small number of instruments examine multiple types of HL (functional, interactive, and critical), while the majority deal solely with the functional component, with the risk of fragmentation. Apart from that, measurement tools may be classified as either performance-based (objective) or self-assessed (subjective), as they capture different aspects, for example, the objective ability to understand medical information versus the effect of emotional or motivational aspects on the decision-making process<sup>15-18</sup>. As a consequence of the

1  
2  
3 lack of a comprehensive approach to HL measurement, the use of different or fragmented HL measures leads  
4  
5 to difficulties in comparing and/or to incomplete results in terms of the HL level and related outcomes, as  
6  
7 well as to an increasing risk of misinterpreting the effectiveness of interventions aimed at improving HL<sup>19-24</sup>.

8  
9 Besides, while performance-based tools can be assumed to objectively measure HL regardless of a person's  
10  
11 environment, self-assessed ones can be considered to be more situation specific; for instance, emotional or  
12  
13 motivational aspects of the decision-making process are also the consequence of family, community, and  
14  
15 system support<sup>13</sup>.

16  
17 For these reasons, many authors suggest measuring HL using different instruments at the same time, so as  
18  
19 to assess different skills, abilities, and competences that constitute such a multidimensional construct<sup>15-25</sup>.

20  
21 Nevertheless, research using performance-based (i.e., direct testing of competences) and self-assessed  
22  
23 (perception-based, i.e., self-reported abilities) measures of different dimensions and types of HL  
24  
25 simultaneously remains scarce, and the results of such studies are usually focused on highlighting the  
26  
27 inconsistencies between the two types of tests, without assessing their potential joint contribution to  
28  
29 measuring HL as a unique concept<sup>14,19,26,27</sup>.

30  
31 In a study conducted on patients affected by diabetes or colon cancer, Waters et al.<sup>28</sup> found that  
32  
33 performance-based and self-assessed HL measures represent related but independent constructs; they are  
34  
35 able to predict objective disease knowledge but not perceived disease knowledge in the same way. Due to  
36  
37 these results, the author concluded that performance-based and self-assessed measures of HL are not  
38  
39 interchangeable, although they tend to be consistent in categorizing patients into different levels of HL<sup>28</sup>. To  
40  
41 the best of our knowledge, no studies adopting a similar approach to the analysis of the HL determinants  
42  
43 have been published as yet.

44  
45 The aim of this study is to compare the results of performance-based and self-assessed measures of HL and  
46  
47 to evaluate the potential contribution of their joint use in assessing some HL antecedents (age and socio-  
48  
49 economical determinants) in a population-based sample. We believe that this is the first attempt to use the  
50  
51

1  
2  
3 information obtained by different HL measurement tools to get further insight into the knowledge about the  
4  
5 antecedents of HL.  
6  
7  
8  
9

## 10 **Methods**

11  
12  
13

14 This study is part of a larger one, conducted in a population-based sample in Florence, Italy, with the aim of  
15  
16 measuring the HL level and validating some HL measurement tools. The study design is described  
17  
18 elsewhere<sup>29</sup>, as well as some of its results<sup>30</sup>.  
19  
20  
21  
22

### 23 *Data collection*

24

25 The study adopted a cross-sectional design that was carried out in a population-based sample. Participants  
26  
27 were randomly selected from the registries of eleven general practitioners (GPs) working in the municipality  
28  
29 of Florence. The municipality of Florence is about 102 km<sup>2</sup> in size, with a population density of about 3500  
30  
31 inhabitants/km<sup>2</sup>; socio-economic and health deprivation data are described elsewhere<sup>31</sup>.  
32  
33

34 The sample size of the study was calculated considering the first aim of the larger study (i.e., to assess the  
35  
36 level of functional HL using the Newest Vital Sign (NVS) in a population sample in Florence, Italy), as described  
37  
38 elsewhere<sup>7</sup>, and it was equal to 480 participants.  
39  
40

41 The GPs were recruited using convenience criteria: all of the GPs from the municipality of Florence were  
42  
43 invited to join the study by both the Provincial Medical Council and the University Hospital of Florence.  
44  
45 According to the study protocol, the first eight who voluntarily joined the study were included and were  
46  
47 asked to select 80 subjects among those registered as patients using a simple random sampling method.  
48  
49 Since oversampling was not enough to reach the sample size of 480, three more GPs were included, with a  
50  
51 second random sample for the first eight. In Italy, every resident over the age of 18 has to be registered in a  
52  
53 general practice, and people are enrolled in the general practices according to their place of residence. This  
54  
55 sampling method was chosen with the aim of increasing the population participation rate, as the invitation  
56  
57 letter was jointly signed by the general practitioners and the researcher in charge of the study.  
58  
59  
60

1  
2  
3 The sample was selected within each neighbourhood of the municipality of Florence, since the recruited  
4  
5 general practices were based in all the areas of Florence.  
6

7 The inclusion criteria were the following: 18–69 years of age and Italian speaking (since the survey was  
8  
9 conducted in Italian). The inclusion criteria were defined according to those of the Italian behavioural risk  
10  
11 factor surveillance system PASSI (*Progressi delle Aziende Sanitarie per la Salute in Italia*)<sup>32</sup>. The exclusion  
12  
13 criteria included cognitive impairment, severe psychiatric disease, or end-stage diseases. Each GP verified  
14  
15 the inclusion and exclusion criteria when selecting the sample.  
16  
17

18 The larger study included two different arms (A and B) with different aims and questionnaires. Each subject  
19  
20 was randomly allocated to one of the two arms. To meet the specific aims of the present study, only the B  
21  
22 arm of the research was considered, since the short form (16 items) of the European Health Literacy Survey  
23  
24 Questionnaire (HLS-EU-Q16) was only administered in this arm, together with the Italian version of the  
25  
26 Newest Vital Sign (NVS-IT, hereinafter, NVS).  
27  
28

29 Data collection started in February 2017 and finished on 31 December 2017. Each selected subject was  
30  
31 contacted via postal mail. Subjects received an information sheet signed by the GP and the person in-charge  
32  
33 of the study, which included a short description of the study, an invitation to participate, and a consent form.  
34  
35 Participants were asked to sign the consent form and return it via mail to the researchers in charge. The mail  
36  
37 also contained the nutritional label of the NVS. After receipt of the signed consent forms, the subjects were  
38  
39 contacted for a computer-assisted telephone interview. If the consent form was not received within 2 weeks,  
40  
41 a follow-up phone call was made by the research group. The phone call served to clarify any questions and  
42  
43 to identify and support people having difficulty completing the consent form (i.e., due to reading difficulty).  
44  
45  
46  
47  
48  
49  
50  
51  
52  
53  
54  
55  
56  
57  
58  
59  
60  
61  
62  
63  
64  
65  
66  
67  
68  
69  
70  
71  
72  
73  
74  
75  
76  
77  
78  
79  
80  
81  
82  
83  
84  
85  
86  
87  
88  
89  
90  
91  
92  
93  
94  
95  
96  
97  
98  
99  
100  
101  
102  
103  
104  
105  
106  
107  
108  
109  
110  
111  
112  
113  
114  
115  
116  
117  
118  
119  
120  
121  
122  
123  
124  
125  
126  
127  
128  
129  
130  
131  
132  
133  
134  
135  
136  
137  
138  
139  
140  
141  
142  
143  
144  
145  
146  
147  
148  
149  
150  
151  
152  
153  
154  
155  
156  
157  
158  
159  
160  
161  
162  
163  
164  
165  
166  
167  
168  
169  
170  
171  
172  
173  
174  
175  
176  
177  
178  
179  
180  
181  
182  
183  
184  
185  
186  
187  
188  
189  
190  
191  
192  
193  
194  
195  
196  
197  
198  
199  
200  
201  
202  
203  
204  
205  
206  
207  
208  
209  
210  
211  
212  
213  
214  
215  
216  
217  
218  
219  
220  
221  
222  
223  
224  
225  
226  
227  
228  
229  
230  
231  
232  
233  
234  
235  
236  
237  
238  
239  
240  
241  
242  
243  
244  
245  
246  
247  
248  
249  
250  
251  
252  
253  
254  
255  
256  
257  
258  
259  
260  
261  
262  
263  
264  
265  
266  
267  
268  
269  
270  
271  
272  
273  
274  
275  
276  
277  
278  
279  
280  
281  
282  
283  
284  
285  
286  
287  
288  
289  
290  
291  
292  
293  
294  
295  
296  
297  
298  
299  
300  
301  
302  
303  
304  
305  
306  
307  
308  
309  
310  
311  
312  
313  
314  
315  
316  
317  
318  
319  
320  
321  
322  
323  
324  
325  
326  
327  
328  
329  
330  
331  
332  
333  
334  
335  
336  
337  
338  
339  
340  
341  
342  
343  
344  
345  
346  
347  
348  
349  
350  
351  
352  
353  
354  
355  
356  
357  
358  
359  
360  
361  
362  
363  
364  
365  
366  
367  
368  
369  
370  
371  
372  
373  
374  
375  
376  
377  
378  
379  
380  
381  
382  
383  
384  
385  
386  
387  
388  
389  
390  
391  
392  
393  
394  
395  
396  
397  
398  
399  
400  
401  
402  
403  
404  
405  
406  
407  
408  
409  
410  
411  
412  
413  
414  
415  
416  
417  
418  
419  
420  
421  
422  
423  
424  
425  
426  
427  
428  
429  
430  
431  
432  
433  
434  
435  
436  
437  
438  
439  
440  
441  
442  
443  
444  
445  
446  
447  
448  
449  
450  
451  
452  
453  
454  
455  
456  
457  
458  
459  
460  
461  
462  
463  
464  
465  
466  
467  
468  
469  
470  
471  
472  
473  
474  
475  
476  
477  
478  
479  
480  
481  
482  
483  
484  
485  
486  
487  
488  
489  
490  
491  
492  
493  
494  
495  
496  
497  
498  
499  
500  
501  
502  
503  
504  
505  
506  
507  
508  
509  
510  
511  
512  
513  
514  
515  
516  
517  
518  
519  
520  
521  
522  
523  
524  
525  
526  
527  
528  
529  
530  
531  
532  
533  
534  
535  
536  
537  
538  
539  
540  
541  
542  
543  
544  
545  
546  
547  
548  
549  
550  
551  
552  
553  
554  
555  
556  
557  
558  
559  
560  
561  
562  
563  
564  
565  
566  
567  
568  
569  
570  
571  
572  
573  
574  
575  
576  
577  
578  
579  
580  
581  
582  
583  
584  
585  
586  
587  
588  
589  
590  
591  
592  
593  
594  
595  
596  
597  
598  
599  
600  
601  
602  
603  
604  
605  
606  
607  
608  
609  
610  
611  
612  
613  
614  
615  
616  
617  
618  
619  
620  
621  
622  
623  
624  
625  
626  
627  
628  
629  
630  
631  
632  
633  
634  
635  
636  
637  
638  
639  
640  
641  
642  
643  
644  
645  
646  
647  
648  
649  
650  
651  
652  
653  
654  
655  
656  
657  
658  
659  
660  
661  
662  
663  
664  
665  
666  
667  
668  
669  
670  
671  
672  
673  
674  
675  
676  
677  
678  
679  
680  
681  
682  
683  
684  
685  
686  
687  
688  
689  
690  
691  
692  
693  
694  
695  
696  
697  
698  
699  
700  
701  
702  
703  
704  
705  
706  
707  
708  
709  
710  
711  
712  
713  
714  
715  
716  
717  
718  
719  
720  
721  
722  
723  
724  
725  
726  
727  
728  
729  
730  
731  
732  
733  
734  
735  
736  
737  
738  
739  
740  
741  
742  
743  
744  
745  
746  
747  
748  
749  
750  
751  
752  
753  
754  
755  
756  
757  
758  
759  
760  
761  
762  
763  
764  
765  
766  
767  
768  
769  
770  
771  
772  
773  
774  
775  
776  
777  
778  
779  
780  
781  
782  
783  
784  
785  
786  
787  
788  
789  
790  
791  
792  
793  
794  
795  
796  
797  
798  
799  
800  
801  
802  
803  
804  
805  
806  
807  
808  
809  
810  
811  
812  
813  
814  
815  
816  
817  
818  
819  
820  
821  
822  
823  
824  
825  
826  
827  
828  
829  
830  
831  
832  
833  
834  
835  
836  
837  
838  
839  
840  
841  
842  
843  
844  
845  
846  
847  
848  
849  
850  
851  
852  
853  
854  
855  
856  
857  
858  
859  
860  
861  
862  
863  
864  
865  
866  
867  
868  
869  
870  
871  
872  
873  
874  
875  
876  
877  
878  
879  
880  
881  
882  
883  
884  
885  
886  
887  
888  
889  
890  
891  
892  
893  
894  
895  
896  
897  
898  
899  
900  
901  
902  
903  
904  
905  
906  
907  
908  
909  
910  
911  
912  
913  
914  
915  
916  
917  
918  
919  
920  
921  
922  
923  
924  
925  
926  
927  
928  
929  
930  
931  
932  
933  
934  
935  
936  
937  
938  
939  
940  
941  
942  
943  
944  
945  
946  
947  
948  
949  
950  
951  
952  
953  
954  
955  
956  
957  
958  
959  
960  
961  
962  
963  
964  
965  
966  
967  
968  
969  
970  
971  
972  
973  
974  
975  
976  
977  
978  
979  
980  
981  
982  
983  
984  
985  
986  
987  
988  
989  
990  
991  
992  
993  
994  
995  
996  
997  
998  
999  
1000

1  
2  
3 Age was collected as a continuous variable and then grouped into four classes (18–45; 46–55; 56–65; >65  
4 years old). Education was classified into three levels (less than high school diploma; high school degree;  
5 bachelor’s degree and higher), while the financial status was investigated by the item “Is your income  
6 adequate to meet monthly living expenses?” with four possible response options (not enough; barely  
7 enough; enough; more than enough). This item was chosen since it is routinely used in the standardized  
8 questionnaire of the Italian behavioural risk factor surveillance system PASSI<sup>33</sup>.  
9  
10  
11  
12  
13  
14  
15  
16  
17

### 18 *HL measures*

19  
20 HL was measured using the NVS and the HLS-EU-Q16. The Italian version of the NVS was validated by  
21 Capecchi et al. from the UK version<sup>34</sup>, and then it was applied in many different contexts<sup>35,36</sup>. It consists of an  
22 ice cream nutrition label with seven associated questions that measure functional HL (prose and numeracy)  
23 using a performance-based approach. It produces a final score ranging from 0 to 6, allowing participants to  
24 be classified into three categories—high likelihood of limited HL (score: 0–1), possibility of limited HL (score:  
25 2–3), and adequate HL (score: 4–6). These cut-off values were identified by Weiss et al. in a validation study  
26 of the NVS, conducted in English-speaking and Spanish-speaking primary care patients, in which the HL  
27 measured using the Test of Functional Health Literacy in Adults (TOFHLA) was considered as a reference<sup>37</sup>.  
28  
29 The HL categories defined using the two cut off values (1 and 3) are widely used in many countries.  
30  
31 NVS data related to the entire sample of the study (A and B arms) have been described elsewhere<sup>7</sup>.  
32  
33  
34  
35  
36  
37  
38  
39  
40  
41  
42

43 The European Health Literacy Survey was the first large population study aimed at generating first-time data  
44 on HL across diverse populations in the European Union<sup>38</sup>. To achieve this purpose, the European Health  
45 Literacy Survey Questionnaire (HLS-EU-Q) for measuring HL was developed<sup>39</sup> on the basis of the  
46 recommendations of Pleasant et al.<sup>24</sup> regarding the characteristics that a comprehensive measure of HL  
47 should have. In particular, starting from the HLS-EU Consortium conceptual framework of HL<sup>2</sup>, the HLS-EU-Q  
48 assesses the processes of accessing, understanding, appraising, and applying health-related information  
49 within the three domains of health: healthcare, disease prevention, and health promotion. It measures self-  
50 assessed functional, critical, and interactive HL (i.e., general HL). The original full version of the HLS-EU-Q  
51  
52  
53  
54  
55  
56  
57  
58  
59  
60

1  
2  
3 comprises 47 items (HLS-EU-Q47), and the HLS-EU-Q16 is its short version that was developed by selecting  
4  
5 16 items<sup>27</sup>. The HLS-EU-Q16 has Likert-type responses (“very easy”, “fairly easy”, “fairly difficult”, “very  
6  
7 difficult”) and an associated final score that measures interaction, comprehension, information seeking,  
8  
9 application/function, decision-making/critical thinking, evaluation, responsibility, confidence, and navigation  
10  
11 skills. To generate the score of the HLS-EU-Q16, the items are dichotomized into two categories with two  
12  
13 scores: “easy” (“fairly” or “very” easy = 1) and “difficult” (“fairly” and “very” difficult = 0). “Don’t  
14  
15 know/refusal” was recoded for missing answers. The scale score was calculated as the sum of the scores of  
16  
17 each item and varied between 0 and 16. As suggested by other studies<sup>26,40</sup>, only respondents who gave an  
18  
19 answer to at least 14 items were considered. Three levels of HL were defined considering the HLS-EU-Q16  
20  
21 score: inadequate HL (0–8), problematic HL (9–12) and sufficient HL (13–16). The cut-off values for defining  
22  
23 the three levels were described by Pelikan et al. using the results of the European Health Literacy Survey,  
24  
25 with respect to the results obtained using the HLS-EU-Q47<sup>41</sup>, and then have been widely used.  
26  
27  
28 As previously described, the Italian version of the HLS-EU-Q16 was validated in this study<sup>30</sup>.

### 31 32 33 34 *Statistical analysis*

35  
36 The Fisher exact test was used to evaluate associations between categorical variables.

37  
38 A new HL measure, named “HL skills”, was defined by combining the results obtained using the two tests  
39  
40 (HLS-EU-Q16 and NVS). The criterion used for combining the two measures was a simple approach that  
41  
42 allowed to different levels of skills to be identified. In particular, the variable was created as follows:  
43  
44

- 45 1) “low HL skills” level that comprises a high likelihood or possibility of limited HL measured by NVS and  
46 inadequate or problematic HL measured by HLS-EU-Q16;
- 47 2) “partial HL skills” level that comprises a high likelihood or possibility of limited HL measured by NVS  
48 and sufficient HL measured by HLS-EU-Q16 or, conversely, adequate HL measured by NVS and  
49 inadequate or problematic HL according to HLS-EU-Q16;
- 50 3) “high HL skills” level that comprises adequate HL measured by NVS and sufficient HL measured by  
51 HLS-EU-Q16.  
52  
53  
54  
55  
56  
57  
58  
59  
60

1  
2  
3 The subjects classified among those with “low HL skills” presented some limitations in both functional and  
4  
5 general HL; those with “partial HL skills” presented some limitation either in functional or in general HL; while  
6  
7 those with “high HL skills” presented the highest level of HL skills in both functional and general HL.  
8

9  
10 A multivariate ordinal logistic regression analysis<sup>42</sup> was performed to assess the predictive roles of age class,  
11  
12 educational level, and financial resources with respect to “HL skills”. Specifically, “HL skills” was the  
13  
14 dependent ordinal variable while age class, educational level, and financial resources were the independent  
15  
16 ordinal variables (covariates). In ordinal logistic regression model, the predictive role is expressed as the  
17  
18 proportional odds ratio (OR), and it can be interpreted in the same way as ORs are interpreted for the  
19  
20 conventional logistic regression for binary outcomes. The OR obtained from this model was a measure of the  
21  
22 change in the odds from lower to higher levels, i.e., from lower to higher HL skills. As a comparison, the same  
23  
24 multivariate ordinal logistic regression analysis was applied considering the level of HL measured by each  
25  
26 single HL test (i.e., NVS and HLS-EU-Q16) as a dependent ordinal variable. Specifically, two models were  
27  
28 developed: in the first one, the NVS level was the dependent variable (1—high likelihood of limited HL; 2—  
29  
30 possibility of limited HL; 3—adequate HL), while in the second one, the HLS-EU-Q16 level was the dependent  
31  
32 variable (1—inadequate HL; 2—problematic HL; 3—sufficient HL).  
33  
34  
35

36 Statistical analyses were conducted using Stata version 15 (Stata Corp, College Station, TX). All tests were  
37  
38 two-sided, and p-values were considered to be statistically significant when below 0.05.  
39  
40  
41  
42

#### 43 *Patient and public involvement*

44  
45 The study population was not directly involved in the design, recruitment, and conduct of this study.  
46  
47 However, the Florence Health Literacy Research Group involved representatives from the Provincial Medical  
48  
49 Council, Local Health Unit, and University Hospital of Florence. All of these representatives were involved in  
50  
51 the study design and questionnaire development and will disseminate the results from this work.  
52  
53  
54  
55

#### 56 **Results**



1  
2  
3 The refusal rate was 15.6%, while 38.2% of the invited people did not respond to any contact attempts and  
4 were considered unreachable. Finally, 212 subjects (58% females; mean age: 53.6 ±11.9 years) were  
5 interviewed for the purpose of this study. The majority of them (96.7%) were Italian, with a high school  
6 (36.3%) or university (45.3%) degree, and had enough or more than enough financial resources at their  
7 disposal from their own or family income to get to the end of the month (68.3%) (Table 1).  
8  
9

10  
11  
12 According to the HLS-EU-Q16, 11.8% had inadequate, 55.2% had problematic, and 33% had sufficient HL;  
13 considering the NVS, 10.4% had a high likelihood of having limited HL, 28.8% had a possibility of having  
14 limited HL, and 60.8% had adequate HL (Table 1).  
15  
16

17  
18  
19 As for NVS, the HL levels were significantly ( $p < 0.05$ ) associated with age class, educational level, and financial  
20 resources, while when measured by HLS-EU-Q16, the HL levels were significantly ( $p < 0.05$ ) associated only  
21 with education. The percentage of people with low HL was higher when it was measured by HLS-EU-Q16 than  
22 for NVS in each category of age class, educational level, and financial resources (Figure 1). For both measures,  
23 the percentage of people with low HL increased with age and became more similar in older people: for HLS-  
24 EU-Q16, it ranged from 59.2% for those aged 18–45 to 78.4% for those >65 years old; for NVS, it ranged from  
25 20% for those aged 18–45 to 67.5% for those aged >65 years old. Similar results were observed for  
26 educational level and financial resources: for both tests, the percentage of people with low HL increased with  
27 a decrease in educational level or financial resources; in the lowest sub-categories (i.e., less than high school  
28 diploma or not having enough financial resources), the percentage of people with low HL became similar  
29 between the two tests.  
30  
31

32  
33  
34 Combining the classifications of both tests (Table 2), 22% of the sample had adequate levels of functional  
35 (measured by NVS) and sufficient general HL (measured by HLS-EU-Q16). On the other hand, 28.3%  
36 presented both low functional HL (high likelihood or possibility of limited HL measured by NVS) and low  
37 general HL (inadequate or problematic HL according to HLS-EU-Q16). However, a greater part of the sample  
38 (49.5%) presented inconsistent HL measurements with low functional HL and sufficient general HL or vice  
39 versa. In particular, the percentage of participants with adequate functional HL and low general HL (38.7%)  
40 was higher than the percentage of participants with low functional HL and sufficient general HL (10.8%).  
41  
42  
43  
44  
45  
46  
47  
48  
49  
50  
51  
52  
53  
54  
55  
56  
57  
58  
59  
60

1  
2  
3 The classification of the subjects into four HL groups (combining the two HL measures) was significantly  
4 associated with age class, educational level, and financial resources (Figure 2; Table S1). With an increase in  
5 age, the percentage of people with adequate HL for NVS and sufficient HL for HLS-EU-Q16 decreased; the  
6 percentage was similar between the 18–45 and 46–55 year-old age groups (about 30%), it halved in the 56–  
7 65 year-old age group, and it halved again in the over 65 year-old age group. A similar tendency, although  
8 less markedly evident, was observed for those with sufficient HL for HLS-EU-Q16 and low HL for NVS. At the  
9 same time, the percentage of subjects with low HL for both tests increased with increasing age, ranging from  
10 12.2% in the youngest age group to 54.1% in the oldest age group. Regarding education, with an increase in  
11 the education level, there was a decrease in the percentage of people with low HL in both tests. The highest  
12 percentage of subjects with adequate HL at NVS and sufficient HL at HLS-EU-Q16 was in the bachelor's degree  
13 and higher group (35.4%), while the lowest percentage was registered in the high school degree group  
14 (10.4%); the latter education group also presented the lowest percentage of people with sufficient HL at HLS-  
15 EU-Q16 and low HL at NVS (9.1%) and the highest percentage of those with low HL at HLS-EU-Q16 and  
16 adequate HL at NVS (46.8%). Moreover, with the increase in the availability of financial resources, the  
17 percentage of people with adequate HL at NVS and sufficient HL at HLS-EU-Q16 increased, and, at the same  
18 time, the percentage of people with low HL in both tests decreased; in particular, the percentage of people  
19 with low HL in both tests halved, moving from the category “not enough” to “barely enough” (from 70% to  
20 32.1%). Finally, in the more “disadvantaged” groups (elderly people, low educational level, not enough  
21 availability of financial resources), the percentage of people with discordant results regarding the HL level  
22 (i.e., low functional HL and sufficient general HL or vice versa) was lower than that obtained in the other  
23 groups.

24  
25  
26  
27  
28  
29  
30  
31  
32  
33  
34  
35  
36  
37  
38  
39  
40  
41  
42  
43  
44  
45  
46  
47  
48  
49  
50 Considering the results of the multivariate ordinal regression model, all categories of the covariates showed  
51 significant associations with the outcome, with the exception of “high school degree”, with an evident trend.  
52 Moreover, OR values were greater than 3 in most cases (Table 3). In particular, the odds of having high HL  
53 skills were higher as age decreased (OR value from 2.36 for 56–65 years old, to 5.14 for 18–45 years old),  
54 financial resources increased (OR value from 5 for “barely enough” resources, to 8.65 for “more than enough”  
55  
56  
57  
58  
59  
60

resources), and for those with a bachelor's degree or higher (OR = 3.72). Table 4 reported the results of the same analyses conducted considering the level of HL as a dependent variable in accordance with the NVS (I model) and the HLS-EU-Q16 (II model). Considering the first model, functional HL significantly increased as age decreased (for those 46–55 years old: OR = 5.84; for those 18–45 years old: OR = 7.17) and for people with a bachelor's degree or higher (OR = 3.78), while financial resources did not show a predictive role. Regarding the second model, age class, educational level, and financial resources were not significantly associated with general HL.

## Discussion

The aim of the study was to compare two different measures of HL and to evaluate the potential contribution of their joint use in assessing HL antecedents in a population-based sample. Our results showed that NVS and HLS-EU-Q16 led to results that did not completely overlap, as a relevant proportion of the population presented different HL levels when measured with different tools. Furthermore, the antecedents of HL investigated in this study have different weights in predicting NVS or HLS-EU-Q16 results. These results indicate that they measure different aspects of HL; these findings are in line with other studies conducted in other countries<sup>14,43</sup>.

A possible explanation for these findings may lay in the nature of the two HL measurement tools, as the HLS-EU-Q16 is a self-assessed measure for general HL, while NVS is a performance-based measure of reading, understanding, and numeracy skills. In fact, what people think they know does not always correspond to what they actually know: people tend to be overconfident (they think they know more than they actually do) or underconfident (they think they know less than they actually do). Overconfidence and underconfidence are a consequence of the matching between knowledge, confidence, self-efficacy, and emotional distress<sup>43-47</sup>, and they may differ from country to country, as they are also influenced by cultural factors<sup>48,49</sup>.

On the other hand, high skills in reading and understanding health related information (functional HL) do not necessarily imply high critical and interactive competencies (included in general HL), as these are also related

1  
2  
3 to problem-solving skills, life experiences, and empowerment<sup>50,51</sup>. In fact, HL could also act as a balance  
4  
5 between individual skills and the demands and complexities of societal systems<sup>12</sup>. Since it represents the  
6  
7 combination of cognitive capacities, life experiences, knowledge, and opportunities<sup>13,14</sup>, it can be influenced  
8  
9 by the social environment in which it is assessed; this feature should and could be considered to tailor  
10  
11 interventions aimed at increasing its levels.  
12

13  
14 The simultaneous use of the two HL measures highlights the presence of three distinct HL groups in the  
15  
16 population. A first group is represented by the participants with an adequate level of functional and sufficient  
17  
18 general HL; this group has a broader range of HL skills (high HL skills) that can be used to participate actively  
19  
20 in everyday situations, extract health information, and derive meaning from different forms of health  
21  
22 communication. This can be applied to changing circumstances, to exert control over their care, and so  
23  
24 on<sup>52,53</sup>. A second group is represented by the participants that presented with both low functional HL and  
25  
26 low general HL. These subjects lack a wide range of HL skills (low HL skills). Lastly, between these two  
27  
28 opposing conditions, a third group (partial HL skills) is represented by about half of the sample and includes  
29  
30 all the participants that presented with inconsistent HL measurements with low functional HL and sufficient  
31  
32 general HL or vice versa; these people have some HL skills, but lack others.  
33  
34  
35

36  
37 As far as the demographic and socio-economic characteristics of the HL groups defined by the two HL  
38  
39 measures are concerned, it is interesting to note that the more vulnerable population groups (the older, less  
40  
41 educated, and poorer) presented lower levels of discrepancy in the results obtained with the two HL tools,  
42  
43 and in most of cases, these groups presented a low HL level for both measures. On the contrary, the youngest  
44  
45 participants (18–45 years), those with a high school degree and those with enough financial resources  
46  
47 presented the highest percentage of people with partial HL skills low functional HL and sufficient general HL  
48  
49 in most cases. There seems to be a social gradient in accessing, understanding, appraising, and applying  
50  
51 information that is useful for adopting appropriate behaviours in everyday life, and in this sense, HL reflects  
52  
53 the disadvantage suffered by the most deprived people regarding education and wealth.  
54

55  
56 Regarding the combination of the results obtained by applying the two HL measures into a new variable, i.e.,  
57  
58 HL skills, findings showed that the new variable strengthens the association between HL and the investigated  
59  
60

1  
2  
3 antecedents. Indeed, the comparison of the three models of multivariate ordinal logistic regression showed  
4 that age, educational level, and financial resources significantly and independently predict HL skills, with OR  
5 values generally being higher than those observed in the models that consider each single HL measure. These  
6 results suggest that a broader evaluation of HL dimensions—obtained by integrating the NVS and the HLS-  
7 EU-Q16 data—could better represent the real meaning of the complex and hard-to-measure concept of HL.  
8 However, further research is needed to confirm these results and to evaluate whether this approach will also  
9 better predict the association between HL and health-related outcomes.

10  
11 Moreover, as widely described for diagnostic and screening tests<sup>54</sup>, the use of parallel tests (i.e., two tests  
12 administered at the same time followed by subsequent combination of the results) results in an increase in  
13 sensitivity—in this case, the identification of people with low HL skills. For these reasons, the integration of  
14 different HL measures using an approach similar to the one used in this study may help to widen the narrow  
15 view resulting from the use of a single measure and may serve as the basis for the design of a more  
16 comprehensive measurement tool for HL. In this regard, it should be underlined that the approach of  
17 integrating different HL measures is in line with what has been suggested by Pleasant et al.<sup>24</sup> for the definition  
18 of a comprehensive measure of HL: multi-dimensional in content and methodology.

19  
20 This study has several limitations. Some of them are related to the sampling procedure. In particular, one of  
21 the main limitations is that the data cannot be considered representative of the overall Italian or Florentine  
22 adult population since the population-based sample was obtained with a combination of convenience and  
23 probability sampling procedures. For this reason, the generalizability of the results to the entire Florentine  
24 population is limited. In fact, although participants were randomly selected from the registers of the GPs, the  
25 GPs were selected using convenience criteria, which may have introduced a selection bias. Additionally,  
26 results may have been influenced by a non-response bias. Particularly, many of the enrolled people had a  
27 high socio-economic level (45.3% had a bachelor's degree or higher and 17.4% had more than enough  
28 financial resources). These limits could influence an external comparison of the study results, since age,  
29  
30  
31  
32  
33  
34  
35  
36  
37  
38  
39  
40  
41  
42  
43  
44  
45  
46  
47  
48  
49  
50  
51  
52  
53  
54  
55  
56  
57  
58  
59  
60

1  
2  
3 educational level, and financial resources are determinants of HL. Sex was not included in the analysis since,  
4  
5 at the univariate analysis, it was not significantly associated with HL.  
6  
7  
8  
9

10 Other limitations are related to the cut-off values of both the NVS and the HLS-EU-Q16 that were used to  
11  
12 categorize the levels of HL. Although widely-used thresholds were applied, these cut-offs have not been  
13  
14 previously validated for the Italian population, since large population-based studies using the NVS and HLS-  
15  
16 EU-Q16 have not been performed yet. Moreover, some alternatives could have been considered for the  
17  
18 combination of the two variables. In particular, one of them could be the combination of the items of the  
19  
20 two measures into a single scale and assessing the reliability using the classic approach. The chosen  
21  
22 methodology is related to the aim of giving an initial, simple approach for assessing the possibility of  
23  
24 integrating different measures of HL, and this will be refined with future studies.  
25  
26  
27  
28  
29

### 30 **Conclusion**

31  
32  
33  
34 In conclusion, our findings suggest that the combination of the results obtained using a performance-based  
35  
36 measure of functional HL (the NVS) and a self-assessed measure of general HL (HLS-EU-Q16) may improve  
37  
38 the understanding of the HL skills of individuals and populations as well as the relationship between HL and  
39  
40 its antecedents. In addition, the new variable generated by this combination of different HL measures (HL  
41  
42 skills) may help to better identify people with low HL skills and could be considered as a new measure of HL  
43  
44 or, at least, a different way of assessing HL and its multidimensional contents. Although further studies are  
45  
46 needed to confirm our findings and to better define the potential of the combined use of different HL  
47  
48 measures, we think that this paper can be considered to be a starting point for a novel approach to the  
49  
50 investigation of HL, regardless of the limits of this research,.  
51  
52  
53

54 Moreover, the results of our study seem to be in line with the evolution of HL proposed by The Secretary's  
55  
56 Advisory Committee on US National Health Promotion and Disease Prevention Objectives for Healthy People  
57  
58 2030: "Health literacy occurs when a society provides accurate health information and services that people  
59  
60

1  
2  
3 can easily find, understand, and use to inform their decisions and actions.” Nowadays, we should consider  
4  
5 HL to be a type of social competence and responsibility, and we should measure all its facets to make it a  
6  
7 discipline that can contribute to a higher level of clarity, accessibility, and actionability, so as to reduce  
8  
9 inequalities in health<sup>55</sup>.

#### 14 **Funding sources**

16 This research did not receive any specific grant from funding agencies in the public, commercial, or not-for-  
17  
18 profit sectors

#### 23 **Ethics approval**

25 The study was approved by the Ethics Committee of the ‘Area Vasta Centro’ (Local Health Unit of Tuscany-  
26  
27 Center, Careggi University Hospital and Meyer University Hospital; Ref. CEAVC: 10113, 01 December 2016).

#### 32 **Author's contribution statement**

34 Chiara Lorini: conception and design of the study; analysis and interpretation of data; drafting and revision  
35  
36 of the manuscript.

38 Vieri Lastrucci: conception and design of the study; generation, collection, assembly and interpretation of  
39  
40 data; drafting and revision of the manuscript.

43 Diana Paolini: conception and design of the study; generation, collection, assembly and interpretation of  
44  
45 data; drafting and revision of the manuscript.

47 Guglielmo Bonaccorsi: conception and design of the study; interpretation of data; drafting and revision of  
48  
49 the manuscript.

52 Other component of the Florence Health Literacy Research Group: conception and design of the study;  
53  
54 generation, collection, assembly of data; drafting and revision of the manuscript.

1  
2  
3  
4  
5  
6  
7  
8  
9  
10  
11  
12  
13  
14  
15  
16  
17  
18  
19  
20  
21  
22  
23  
24  
25  
26  
27  
28  
29  
30  
31  
32  
33  
34  
35  
36  
37  
38  
39  
40  
41  
42  
43  
44  
45  
46  
47  
48  
49  
50  
51  
52  
53  
54  
55  
56  
57  
58  
59  
60

### **Conflict of interest statement**

The authors declare no conflict of interest.

### **Acknowledgments**

The Authors want to thank the MDPI English editing service for the copyediting.

### **Data availability statement**

The dataset generated and analysed during the current study is available from the corresponding author on reasonable request.

### **Figures and Tables**

**Figure 1.** Percentage of people with low health literacy by age class (A), educational level (B), and financial resources (C).

**Figure 2.** Percentage of people with regards to the two health literacy measures (HLS-EU-Q16 and NVS) by age class (A), educational level (B), and financial resources (C). For each graph,  $p < 0.05$  (Fisher exact test).



**Table 1.** Descriptive analysis of the collected data (N = 212).

| Variables                                                                                               |                               | N   | %    |
|---------------------------------------------------------------------------------------------------------|-------------------------------|-----|------|
| <b>Age class</b>                                                                                        | 18–45                         | 49  | 23.1 |
|                                                                                                         | 46–55                         | 53  | 25.0 |
|                                                                                                         | 56–65                         | 73  | 34.4 |
|                                                                                                         | >65                           | 37  | 17.5 |
| <b>Educational level</b>                                                                                | Less than high school diploma | 39  | 18.4 |
|                                                                                                         | High school degree            | 77  | 36.3 |
|                                                                                                         | Bachelor's degree and higher  | 96  | 45.3 |
| <b>Financial resources at disposal from own or family income enough to get to the end of the month*</b> | Not enough                    | 10  | 4.7  |
|                                                                                                         | Barely enough                 | 56  | 26.4 |
|                                                                                                         | Enough                        | 108 | 50.9 |
|                                                                                                         | More than enough              | 37  | 17.4 |
| <b>NVS level</b>                                                                                        | High likelihood of limited HL | 22  | 10.4 |
|                                                                                                         | Possibility of limited HL     | 61  | 28.8 |
|                                                                                                         | Adequate HL                   | 129 | 60.8 |
| <b>HLS-EU-Q16 levels</b>                                                                                | Inadequate HL                 | 25  | 11.8 |
|                                                                                                         | Problematic HL                | 117 | 55.2 |
|                                                                                                         | Sufficient HL                 | 70  | 33.0 |

\*1 missing value. HL: health literacy; HLS-EU-Q16: European Health Literacy Survey Questionnaire; NVS:

Newest Vital Sign.

**Table 2.** Level of health literacy considering both measures (NVS and HLS-EU-Q16).

|            |                              | NVS                                          |             | Total      |
|------------|------------------------------|----------------------------------------------|-------------|------------|
|            |                              | High likelihood or possibility of limited HL | Adequate HL |            |
| HLS-EU-Q16 | Inadequate or problematic HL | 60 (28.3%)                                   | 82 (38.7%)  | 142 (67%)  |
|            | Sufficient HL                | 23 (10.8%)                                   | 47 (22.2%)  | 70 (33%)   |
| Total      |                              | 83 (39.1%)                                   | 129 (60.9%) | 212 (100%) |

**Table 3.** Multivariate ordinal logistic regression model (N = 211). Dependent variable: HL skills, obtained combining the results of the two measures (HLS-EU-Q16 and NVS; “low HL skills”, “partial HL skills”, “high HL skills”). OR: Odds Ratio; SE: standard error; CI: Confidence Interval.

| Variables                                                                                              |                               | OR (95%CI)        | P>z    |
|--------------------------------------------------------------------------------------------------------|-------------------------------|-------------------|--------|
| <b>Age class</b>                                                                                       | >65                           | 1                 | -      |
|                                                                                                        | 56-65                         | 2.36 (1.05–5.33)  | 0.038  |
|                                                                                                        | 46-55                         | 4.85 (2.01–11.71) | <0.001 |
|                                                                                                        | 18-45                         | 5.14 (2.10–12.54) | <0.001 |
| <b>Educational level</b>                                                                               | Less than high school diploma | 1                 | -      |
|                                                                                                        | High school degree            | 1.33 (0.59–3.02)  | 0.486  |
|                                                                                                        | Bachelor’s degree and higher  | 3.72 (1.64–8.44)  | 0.002  |
| <b>Financial resources at disposal from own or family income enough to get to the end of the month</b> | Not enough                    | 1                 | -      |
|                                                                                                        | Barely enough                 | 5.50 (1.19–25.36) | 0.029  |
|                                                                                                        | Enough                        | 5.57 (1.26–24.54) | 0.023  |
|                                                                                                        | More than enough              | 8.65 (1.79–41.73) | 0.007  |

LR  $\chi^2(10) = 51.38$ ; Prob >  $\chi^2 < 0.001$ ; Log likelihood =  $-193.35519$ ; Pseudo R<sup>2</sup> = 0.1173

**Table 4.** Multivariate ordinal logistic regression models (N = 211). In the first model, dependent variable: NVS (three levels); in the second model, dependent variable: HLS-EU-Q16 (three levels). OR: Odds Ratio; SE: standard error; CI: Confidence Interval.

| Variables                                                                                              |                               | I model: NVS as dependent variable* |        | II model: HLS-EU-Q16 as dependent variable° |       |
|--------------------------------------------------------------------------------------------------------|-------------------------------|-------------------------------------|--------|---------------------------------------------|-------|
|                                                                                                        |                               | OR (95%CI)                          | P>z    | OR (95%CI)                                  | P>z   |
| <b>Age class</b>                                                                                       | >65                           | 1                                   | -      | 1                                           | -     |
|                                                                                                        | 56–65                         | 2.13 (0.96–4.70)                    | 0.060  | 1.45 (0.66–3.18)                            | 0.357 |
|                                                                                                        | 46–55                         | 5.84 (2.33–14.65)                   | <0.001 | 1.60 (0.69–3.73)                            | 0.271 |
|                                                                                                        | 18–45                         | 7.17 (2.70–19.04)                   | <0.001 | 1.95 (0.83–4.61)                            | 0.126 |
| <b>Educational level</b>                                                                               | Less than high school diploma | 1                                   | -      | 1                                           | -     |
|                                                                                                        | High school degree            | 1.90 (0.86–4.17)                    | 0.110  | 0.65 (0.30–1.42)                            | 0.285 |
|                                                                                                        | Bachelor's degree and higher  | 3.78 (1.70–8.42)                    | 0.001  | 1.31 (0.62.83)                              | 0.493 |
| <b>Financial resources at disposal from own or family income enough to get to the end of the month</b> | Not enough                    | 1                                   | -      | 1                                           | -     |
|                                                                                                        | Barely enough                 | 1.76 (0.49–6.37)                    | 0.386  | 2.31 (0.61–8.69)                            | 0.215 |
|                                                                                                        | Enough                        | 3.40 (0.97–11.94)                   | 0.057  | 1.87 (0.52–6.71)                            | 0.336 |
|                                                                                                        | More than enough              | 2.91 (0.73–11.64)                   | 0.131  | 3.91 (0.98–15.60)                           | 0.054 |

\* LR  $\chi^2(10) = 50.6$ ; Prob >  $\chi^2 < 0.001$ ; Log likelihood =  $-163.36457$ ; Pseudo R2 = 0.1341

° LR  $\chi^2(10) = 15.64$ ; Prob >  $\chi^2 = 0.0479$ ; Log likelihood =  $-192.14072$ ; Pseudo R2 = 0.0391

## References

1. Kickbusch IS. Health literacy: Addressing the health and education divide. *Health Promot Int* 2001;**16**:289–97. <https://doi.org/10.1093/heapro/16.3.289>.
2. Sørensen K, Van den Broucke S, Fullam J, *et al*. Consortium Health Literacy Project European. Health literacy and public health: a systematic review and integration of definitions and models. *BMC Public Health* 2012;**12**:80. doi: 10.1186/1471-2458-12-80.
3. Van den Broucke S. Health literacy: a critical concept for public health. *Arch Public Health* 2014;**72**: 10. doi: 10.1186/2049-3258-72-10.
4. Freebody P, Luke A. 'Literacies' programs: debates and demands in cultural context. *Prospect* 1990;**5**: 7-16.
5. Kickbusch I, Pelikan LM, Apfel F, *et al*. *Health literacy. The solid facts*. Copenhagen: World Health Organisation Regional Office for Europe, 2013.
6. Kobayashi L, Wardle J, Wolf MS, *et al*. Aging and functional health literacy: a systematic review and meta-analysis. *J Gerontol B Psychol Sci Soc Sci* 2016;**71**:445-57. doi: 10.1093/geronb/gbu161.
7. Bonaccorsi G, Lastrucci V, Vettori V, *et al*. Functional Health Literacy in a population-based sample in Florence: an assessment using the Newest Vital Sign. *BMJ Open* 2019;**9**:e026356. doi: 10.1136/bmjopen-2018-026356.
8. Adams RJ, Appleton SL, Hill CL, *et al*. Risks associated with low functional health literacy in an Australian population. *Med J Aust* 2009;**191**:530–4.
9. Stormacq C, Van den Broucke S, Wosinski J. Does health literacy mediate the relationship between socioeconomic status and health disparities? Integrative review. *Health Promot Int* 2018. doi: 10.1093/heapro/day062.
10. Pelikan JM, Ganahl K, Roethlin F. Health literacy as a determinant, mediator and/or moderator of health: empirical models using the European Health Literacy Survey dataset. *Glob Health Promot* 2018;**25**:57-66. doi: 10.1177/1757975918788300.

- 1  
2  
3 11. Lastrucci V, Lorini C, Caini S, *et al.* Health literacy as a mediator of the relationship between  
4 socioeconomic status and health: A cross-sectional study in a population-based sample in Florence.  
5 *PLoS One* 2019;**14**(12):e0227007. doi: 10.1371/journal.pone.0227007.  
6  
7  
8  
9  
10 12. Parker R. Measuring health literacy: What? So what? Now what. In: *Measures of health literacy:*  
11 *workshop summary*. Washington, DC: National Academies Press, 2009.  
12  
13  
14 13. Levin-Zamir D, Leung AYM, Dodson S, Rowlands G. Health Literacy in Selected Populations:  
15 Individuals, Families, and Communities From the International and Cultural Perspective. *Stud Health*  
16 *Technol Inform* 2017;**240**:392-414.  
17  
18  
19  
20 14. HLS-EU Consortium. Comparative report on health literacy in eight EU member states. The European  
21 health literacy survey HLS-  
22 EU. 2012 [http://ec.europa.eu/chafea/documents/news/Comparative\\_report\\_on\\_health\\_literacy\\_i](http://ec.europa.eu/chafea/documents/news/Comparative_report_on_health_literacy_in_eight_EU_member_states.pdf)  
23 [n\\_eight\\_EU\\_member\\_states.pdf](http://ec.europa.eu/chafea/documents/news/Comparative_report_on_health_literacy_in_eight_EU_member_states.pdf)  
24  
25  
26  
27  
28  
29  
30 15. Nguyen TH, Paasche-Orlow MK, McCormack LA. The state of the science of health literacy  
31 measurement. *Stud Health Technol Inform* 2017;**240**:17-33. doi: 10.3233/ISU-170827.  
32  
33  
34 16. Altin SV, Finke I, Kautz-Freimuth S, Stock S. The evolution of health literacy assessment tools: a  
35 systematic review. *BMC Public Health* 2014;**14**:1207. doi: 10.1186/1471-2458-14-1207.  
36  
37  
38 17. Haun JN, Valerio MA, McCormack LA, *et al.* Health literacy measurement: an inventory and  
39 descriptive summary of 51 instruments. *J Health Commun* 2014;**19**:302-33. doi:  
40 10.1080/10810730.2014.936571.  
41  
42  
43  
44  
45 18. Jordan JE, Osborne RH, Buchbinder R. Critical appraisal of health literacy indices revealed variable  
46 underlying constructs, narrow content and psychometric weaknesses. *J Clin Epidemiol* 2011;**64**:366-  
47 79. doi: 10.1016/j.jclinepi.2010.04.005.  
48  
49  
50  
51  
52 19. Kiechle ES, Bailey SC, Hedlund LA, *et al.* Different measures, different outcomes? A systematic review  
53 of performance-based versus self-reported measures of health literacy and numeracy. *J Gen Intern*  
54 *Med* 2015;**30**:1538-46. doi: 10.1007/s11606-015-3288-4.  
55  
56  
57  
58  
59  
60

- 1  
2  
3 20. Marciano L, Camerini AL, Schulz PJ. The role of health literacy in diabetes knowledge, self-care, and  
4  
5 glycemic control: a meta-analysis. *J Gen Intern Med* 2019;**34**:1007-17. doi: 10.1007/s11606-019-  
6  
7 04832-y.  
8  
9  
10 21. Malloy-Weir L, Cooper M. Health literacy, literacy, numeracy and nutrition label understanding and  
11  
12 use: a scoping review of the literature. *J Hum Nutr Diet* 2017;**30**:309-25. doi: 10.1111/jhn.12428.  
13  
14 22. Lorini C, Santomauro F, Donzellini M, *et al.* Health literacy and vaccination: a systematic review. *Hum*  
15  
16 *Vaccin Immunother* 2018;**14**:478-88. doi: 10.1080/21645515.2017.  
17  
18 23. Griffin JM, Partin MR, Noorbaloochi S, *et al.* Variation in estimates of limited health literacy by  
19  
20 assessment instruments and non-response bias. *J Gen Intern Med* 2010;**27**:675-81. doi:  
21  
22 10.1007/s11606-010-1304-2.  
23  
24 24. Pleasant A, McKinney J, Rikard RV. Health Literacy measurement: a proposed research agenda. *J*  
25  
26 *Health Commun* 2011;**16**:11-21. doi: 10.1080/10810730.2011.604392.  
27  
28 25. McCormack L, Haun J, Sørensen K, *et al.* Recommendations for advancing health literacy  
29  
30 measurement. *J Health Commun* 2013;**18**:9-14. doi: 10.1080/10810730.2013.829892.  
31  
32 26. Almaleh R, Helmy Y, Farhat E, *et al.* Assessment of health literacy among outpatient clinics attendees  
33  
34 at Ain Shams University Hospitals. Egypt: a cross-sectional study. *Public Health* 2017;**151**:137-45. doi:  
35  
36 10.1016/j.puhe.2017.06.024.  
37  
38 27. Pelikan JM, Ganahl K. Measuring health literacy in general populations: primary findings from the  
39  
40 HLS-EU Consortium's Health Literacy Assessment Effort. *Stud Health Technol Inf* 2017;**240**:34-59. doi:  
41  
42 10.3233/978-1-61499-790-0-34.  
43  
44 28. Waters EA, Biddle C, Kaphingst KA, *et al.* Examining the interrelations among objective and subjective  
45  
46 health literacy and numeracy and their associations with health knowledge. *J Gen Intern Med*  
47  
48 2018;**33**:1945-53. doi: 10.1007/s11606-018-4624-2.  
49  
50 29. Lorini C, Santomauro F, Grazzini M, *et al.* Health literacy in Italy: a cross-sectional study protocol to  
51  
52 assess the health literacy level in a population-based sample and to validate health literacy measures  
53  
54 in the Italian language. *BMJ Open* 2017;**7**: 017812. doi: 10.1136/bmjopen-2017-017812.  
55  
56  
57  
58  
59  
60

- 1  
2  
3 30. Lorini C, Lastrucci V, Mantwill S, *et al.* Measuring health literacy in Italy: a validation study of the HLS-  
4 EU-Q16 and of the HLS-EU-Q6 in Italian language, conducted in Florence and its surroundings. *Ann*  
5 *Ist Super Sanita* 2019;**55**:10-8. doi: 10.4415/ANN\_19\_01\_04.  
6  
7  
8  
9  
10 31. Bechini A, Pieralli F, Chellini E, *et al.* Application of socio-economic-health deprivation index, analysis  
11 of mortality and influenza vaccination coverage in the elderly population of Tuscany. *J Prev Med Hyg*  
12 2019;**59**(4 Suppl 2): E18–E25. <https://doi.org/10.15167/2421-4248/jpmh2018.59.4s2.1116>  
13  
14  
15  
16 32. Unim B, De Vito C, Massimi A, *et al.* The need to improve implementation and use of lifestyle  
17 surveillance systems for planning prevention activities: an analysis of the Italian Regions. *Public*  
18 *health* 2016;**130**:51-58.  
19  
20  
21  
22  
23 33. Minardi V, Ferrante G, D’Argenio P, *et al.* Roll-your-own cigarette use in Italy: sales and consumer  
24 profile—data from PASSI surveillance, 2015–2016. *Int J Public Health* 2019;**64**(3): 423-430.  
25  
26  
27  
28 34. Capecchi L, Guazzini A, Lorini C, *et al.* The first Italian validation of the most widespread health literacy  
29 assessment tool: the Newest Vital Sign. *Epidemiol Prev* 2015;**39**: 124–8.  
30  
31  
32 35. Bonaccorsi G, Pieralli F, Innocenti M, *et al.* Non-familial paid caregivers as potential flu carriers and  
33 cause of spread: the primary prevention of flu measured through their adhesion to flu vaccination  
34 campaigns - A Florentine experience. *Hum Vaccin Immunother* 2019;**2**:1-7. doi:  
35 10.1080/21645515.2019.1593726.  
36  
37  
38  
39  
40 36. Bonaccorsi G, Grazzini M, Pieri L, *et al.* Assessment of Health Literacy and validation of single-item  
41 literacy screener (SILS) in a sample of Italian people. *Ann Ist Super Sanita* 2017;**53**:205–12. doi:  
42 10.4415/ANN\_17\_03\_05.  
43  
44  
45  
46  
47 37. Weiss BD, Mays MZ, Martz W, *et al.* Quick Assessment of Literacy in Primary Care: The Newest Vital  
48 Sign. *Ann Fam Med* 2005;**3**(6):514-22.  
49  
50  
51  
52 38. Sørensen K, Pelikan JM, Röthlin F, *et al.* Health literacy in Europe: comparative results of the  
53 European health literacy survey (HLS-EU). *Eur J Public Health* 2015;**25**:1053-8. doi:  
54 10.1093/eurpub/ckv043.  
55  
56  
57  
58  
59  
60



- 1  
2  
3 39. Sørensen K, Van den Broucke S, Pelikan JM, *et al.* Measuring health literacy in populations:  
4  
5 illuminating the design and development process of the European Health Literacy Survey  
6  
7 Questionnaire (HLS-EU-Q). *BMC Public Health* 2013;**13**: 948. doi: 10.1186/1471-2458-13-948.  
8  
9
- 10 40. Halbach SM, Ernstmann N, Kowalski C, *et al.* Unmet information needs and limited health literacy in  
11  
12 newly diagnosed breast cancer patients over the course of cancer treatment. *Patient Educ Couns*  
13  
14 2016;**99**:1511-18. doi: 10.1016/j.pec.2016.06.028.  
15  
16
- 17 41. Pelikan JM, Ganahl K. Measuring health literacy in general populations: primary findings from the  
18  
19 HLS-EU Consortium's health literacy assessment effort. *Stud Health Technol Inform* 2017;**240**:34-59.  
20  
21
- 22 42. Koletsi D, Pandis N. Ordinal logistic regression. *Am J Orthod Dentofacial Orthop* 2018;**153**:157-8. doi:  
23  
24 10.1016/j.ajodo.2017.11.011.  
25  
26
- 27 43. Fransen MP, Leenaars KE, Rowlands G, *et al.* International application of health literacy measures:  
28  
29 adaptation and validation of the newest vital sign in The Netherlands. *Patient Educ Couns*  
30  
31 2014;**97**:403-9. doi: 10.1016/j.pec.2014.08.017.  
32  
33
- 34 44. Alba JW. Knowledge calibration what consumers know and what they think they know. *J Consum Res*  
35  
36 2000;**27**:123-65. <https://doi.org/10.1086/314317>.  
37  
38
- 39 45. Carlson JP, Vincent LH, Hardesty DM, *et al.* Objective and subjective knowledge relationships: a  
40  
41 quantitative analysis of consumer research findings. *J Consum Res* 2009;**35**:864-76.  
42  
43 <https://doi.org/10.1086/593688>.  
44  
45
- 46 46. Pieniak S, Aertsens J, Verbeke W. Subjective and objective knowledge as determinants of organic  
47  
48 vegetables consumption. *Food Qual Preference* 2010;**21**:581-88.  
49  
50 <https://doi.org/10.1016/j.foodqual.2010.03.004>.  
51  
52
- 53 47. Schinckus L, Dangoisse F, Van den Broucke S, *et al.* When knowing is not enough: emotional distress  
54  
55 and depression reduce the positive effects of health literacy on diabetes self-management. *Patient*  
56  
57 *Educ Couns* 2018;**101**:324-30. doi: 10.1016/j.pec.2017.08.006.  
58  
59  
60

- 1  
2  
3 48. Stolp S, Zabrocky KM. Contributions of metacognitive and self-regulated learning theories to  
4 investigations of calibration of comprehension. *International Electronic Journal of Elementary*  
5 *Education* 2017;**2**:7-31.  
6  
7  
8  
9  
10 49. Belmi P, Neale MA, Reiff D. *et al.* The social advantage of miscalibrated individuals: the relationship  
11 between social class and overconfidence and its implications for class-based inequality. *J Pers Soc*  
12 *Psychol* (2019). doi: 10.1037/pspi0000187  
13  
14  
15  
16 50. Crondahl K, Karlsson LE. The nexus between health literacy and empowerment: a scoping review.  
17 *Sage Open* 2016;**6**:1-7. <https://doi.org/10.1177/2158244016646410>  
18  
19  
20  
21 51. Nutbeam D. Health literacy as a public health goal: a challenge for contemporary health education  
22 and communication strategies into the 21<sup>st</sup> century. *Health Prom Intern* 2000;**15**:259-67.  
23 <https://doi.org/10.1093/heapro/15.3.259>.  
24  
25  
26  
27 52. Chinn D. Critical health literacy: a review and critical analysis. *Soc Sci Med* 2011;**73**:60-7. doi:  
28 10.1016/j.socscimed.2011.04.004.  
29  
30  
31  
32 53. Van der Heide I, Heijmans M, Schuit AJ, *et al.* Functional, interactive and critical health literacy:  
33 varying relationships with control over care and number of GP visits. *Patient Educ Couns*  
34 2015;**98**:998-1004. doi: 10.1016/j.pec.2015.04.006.  
35  
36  
37  
38 54. Fletcher RH, Fletcher SH, Fletcher Grant S. *Clinical epidemiology: the essentials, fifth ed.*, Lippincott  
39 Williams & Wilkins, Philadelphia 2012.  
40  
41  
42  
43 55. United States Government, Office of Disease Prevention and Health Promotion, Office of the  
44 Assistant Secretary for Health, Office of the Secretary, Department of Health and Human Services.  
45 Solicitation for Written Comments on an Updated Health Literacy Definition for Healthy People 2030.  
46 Available at: [https://www.federalregister.gov/documents/2019/06/04/2019-11571/solicitation-for-](https://www.federalregister.gov/documents/2019/06/04/2019-11571/solicitation-for-written-comments-on-an-updated-health-literacy-definition-for-healthy-people-2030)  
47 [written-comments-on-an-updated-health-literacy-definition-for-healthy-people-2030](https://www.federalregister.gov/documents/2019/06/04/2019-11571/solicitation-for-written-comments-on-an-updated-health-literacy-definition-for-healthy-people-2030).  
48  
49  
50  
51  
52  
53  
54  
55  
56  
57  
58  
59  
60

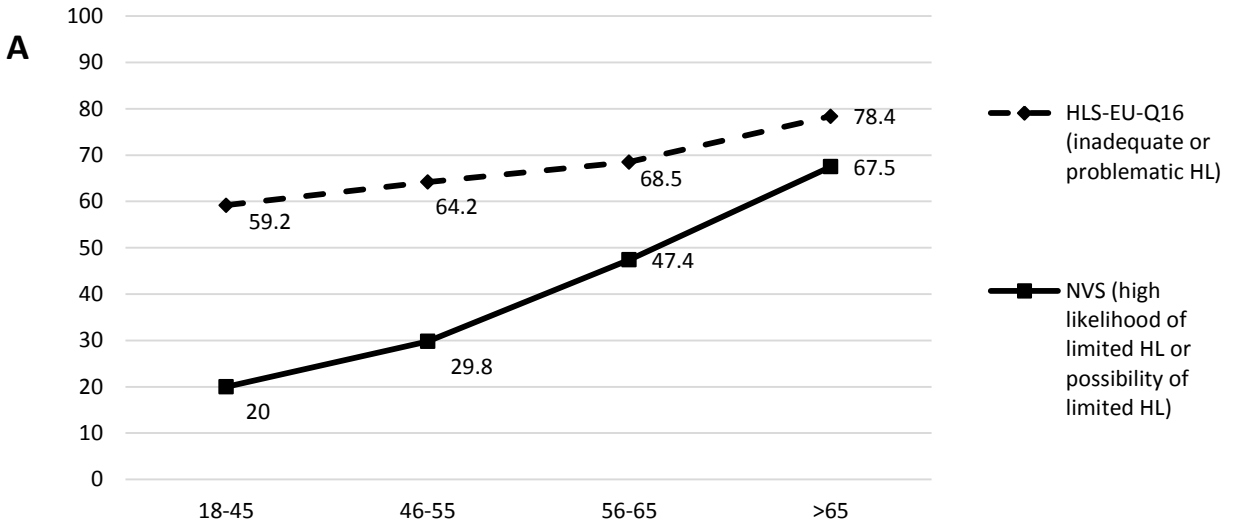

Low Health Literacy by educational level (%)

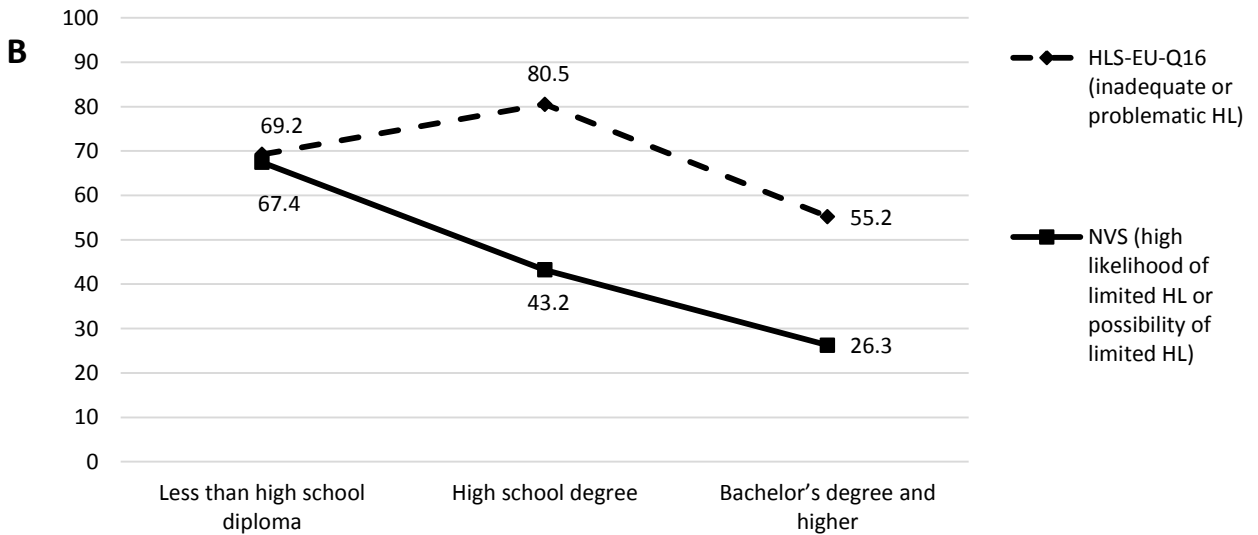

Low Health Literacy by Financial resources (%)

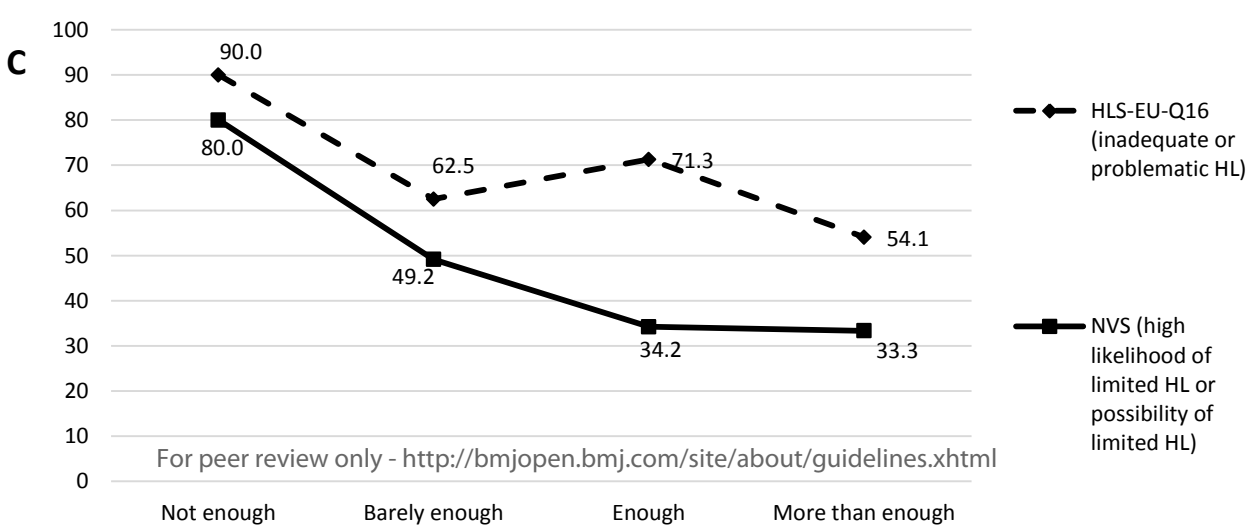

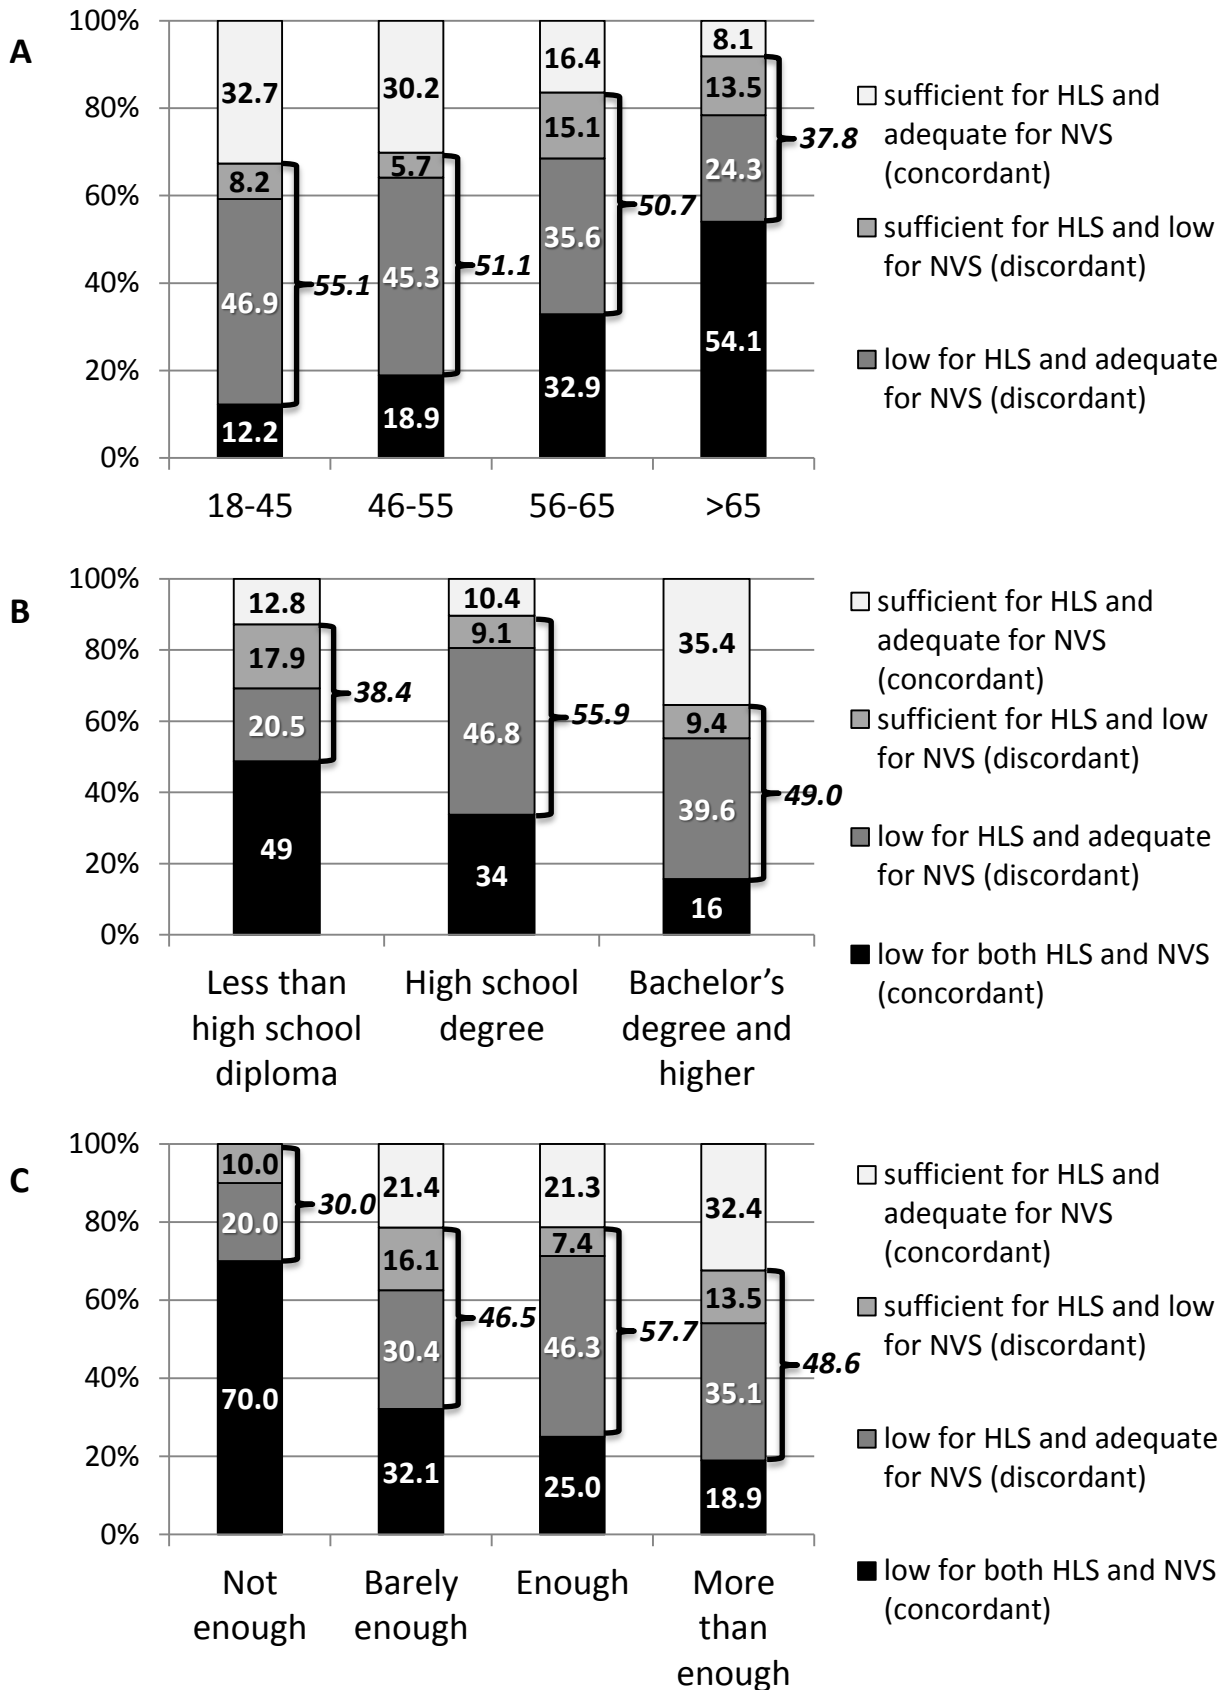

**Table S1.** Percentage of people with regards to the two health literacy measures (HLS-EU-Q16 and NVS) by age class, educational level, and financial resources.

CI= Confidence Interval.

| Variables                                                                                              |                               | HL level                              |                                               |                                                 |                                                      |
|--------------------------------------------------------------------------------------------------------|-------------------------------|---------------------------------------|-----------------------------------------------|-------------------------------------------------|------------------------------------------------------|
|                                                                                                        |                               | Raw percentage (95% CI)               |                                               |                                                 |                                                      |
|                                                                                                        |                               | low for both HLS and NVS (concordant) | low for HLS and adequate for NVS (discordant) | sufficient for HLS and low for NVS (discordant) | sufficient for HLS and adequate for NVS (concordant) |
| <b>Age</b>                                                                                             | ≤45                           | 12.2% (4.6–24.8%)                     | 46.9% (32.5–61.7%)                            | 8.2% (2.3–19.6%)                                | 32.7% (19.0–47.5%)                                   |
|                                                                                                        | 46–55                         | 18.9% (9.4–32%)                       | 45.3% (31.6–59.6%)                            | 5.7% (1.2–15.7%)                                | 30.2% (18.3–44.3%)                                   |
|                                                                                                        | 56–65                         | 32.9% (22.3–44.9%)                    | 35.6% (24.7–47.7%)                            | 15.1% (7.8–25.4%)                               | 16.4% (8.8–27.0%)                                    |
|                                                                                                        | >65                           | 54.1% (36.9–70.5%)                    | 24.3% (11.8–41.2%)                            | 13.5% (4.5–28.8%)                               | 8.1% (1.7–21.9%)                                     |
| <b>Educational level</b>                                                                               | Less than high school diploma | 48.7% (32.4–65.2%)                    | 20.5% (9.3–36.5%)                             | 17.9% (7.5–33.5%)                               | 12.8% (4.3–27.4%)                                    |
|                                                                                                        | High school degree            | 33.8% (23.4–45.4%)                    | 46.8% (35.3–58.5%)                            | 9.1% (3.7–17.8%)                                | 10.4% (4.6–19.4%)                                    |
|                                                                                                        | Bachelor's degree and higher  | 15.6% (9–24.5%)                       | 39.6% (29.7–50.1%)                            | 9.4% (4.4–17.1%)                                | 35.4% (25.9–45.8%)                                   |
| <b>Financial resources at disposal from own or family income enough to get to the end of the month</b> | Not enough                    | 70.0% (34.8–93.3%)                    | 20.0% (2.5–55.6%)                             | 10.0% (0.3–44.5%)                               | 0% (0–30.8%)                                         |
|                                                                                                        | Barely enough                 | 32.1% (20.3–40%)                      | 30.4% (18.8–44.1%)                            | 16.1% (7.6–28.3)                                | 21.4% (11.6–34.4%)                                   |
|                                                                                                        | Enough                        | 25.0% (17.2–34.3%)                    | 46.3% (36.7–56.2%)                            | 7.4% (3.3–14.1%)                                | 21.3% (14–30.2%)                                     |
|                                                                                                        | More than enough              | 18.9% (8–35.2%)                       | 35.1% (20.2–52.5%)                            | 13.5% (4.5–28.8%)                               | 32.4% (18–49.8%)                                     |

**STROBE 2007 (v4) Statement—Checklist of items that should be included in reports of *cross-sectional studies***

| Section/Topic                | Item # | Recommendation                                                                                                                                                                       | Reported on page # |
|------------------------------|--------|--------------------------------------------------------------------------------------------------------------------------------------------------------------------------------------|--------------------|
| <b>Title and abstract</b>    | 1      | (a) Indicate the study's design with a commonly used term in the title or the abstract                                                                                               | 1                  |
|                              |        | (b) Provide in the abstract an informative and balanced summary of what was done and what was found                                                                                  | 2                  |
| <b>Introduction</b>          |        |                                                                                                                                                                                      |                    |
| Background/rationale         | 2      | Explain the scientific background and rationale for the investigation being reported                                                                                                 | 4; 5               |
| Objectives                   | 3      | State specific objectives, including any prespecified hypotheses                                                                                                                     | 5; 6               |
| <b>Methods</b>               |        |                                                                                                                                                                                      |                    |
| Study design                 | 4      | Present key elements of study design early in the paper                                                                                                                              | 6                  |
| Setting                      | 5      | Describe the setting, locations, and relevant dates, including periods of recruitment, exposure, follow-up, and data collection                                                      | 6                  |
| Participants                 | 6      | (a) Give the eligibility criteria, and the sources and methods of selection of participants                                                                                          | 7                  |
| Variables                    | 7      | Clearly define all outcomes, exposures, predictors, potential confounders, and effect modifiers. Give diagnostic criteria, if applicable                                             | 6; 7; 8            |
| Data sources/<br>measurement | 8*     | For each variable of interest, give sources of data and details of methods of assessment (measurement). Describe comparability of assessment methods if there is more than one group | 6;7; 8             |
| Bias                         | 9      | Describe any efforts to address potential sources of bias                                                                                                                            | 8                  |
| Study size                   | 10     | Explain how the study size was arrived at                                                                                                                                            | 5;6                |
| Quantitative variables       | 11     | Explain how quantitative variables were handled in the analyses. If applicable, describe which groupings were chosen and why                                                         | 8; 9               |
| Statistical methods          | 12     | (a) Describe all statistical methods, including those used to control for confounding                                                                                                | 8; 9               |
|                              |        | (b) Describe any methods used to examine subgroups and interactions                                                                                                                  | 8; 9               |
|                              |        | (c) Explain how missing data were addressed                                                                                                                                          | 8; 9               |
|                              |        | (d) If applicable, describe analytical methods taking account of sampling strategy                                                                                                   | N/A                |
|                              |        | (e) Describe any sensitivity analyses                                                                                                                                                | N/A                |
| <b>Results</b>               |        |                                                                                                                                                                                      |                    |

|                          |     |                                                                                                                                                                                                              |            |
|--------------------------|-----|--------------------------------------------------------------------------------------------------------------------------------------------------------------------------------------------------------------|------------|
| Participants             | 13* | (a) Report numbers of individuals at each stage of study—eg numbers potentially eligible, examined for eligibility, confirmed eligible, included in the study, completing follow-up, and analysed            | 11         |
|                          |     | (b) Give reasons for non-participation at each stage                                                                                                                                                         | 11         |
|                          |     | (c) Consider use of a flow diagram                                                                                                                                                                           | N/A        |
| Descriptive data         | 14* | (a) Give characteristics of study participants (eg demographic, clinical, social) and information on exposures and potential confounders                                                                     | 11, 12     |
|                          |     | (b) Indicate number of participants with missing data for each variable of interest                                                                                                                          | 19         |
| Outcome data             | 15* | Report numbers of outcome events or summary measures                                                                                                                                                         | 11; 12; 13 |
| Main results             | 16  | (a) Give unadjusted estimates and, if applicable, confounder-adjusted estimates and their precision (eg, 95% confidence interval). Make clear which confounders were adjusted for and why they were included | 21-23      |
|                          |     | (b) Report category boundaries when continuous variables were categorized                                                                                                                                    | 19-22      |
|                          |     | (c) If relevant, consider translating estimates of relative risk into absolute risk for a meaningful time period                                                                                             | N/A        |
| Other analyses           | 17  | Report other analyses done—eg analyses of subgroups and interactions, and sensitivity analyses                                                                                                               | N/A        |
| <b>Discussion</b>        |     |                                                                                                                                                                                                              |            |
| Key results              | 18  | Summarise key results with reference to study objectives                                                                                                                                                     | 13         |
| Limitations              | 19  | Discuss limitations of the study, taking into account sources of potential bias or imprecision. Discuss both direction and magnitude of any potential bias                                                   | 16         |
| Interpretation           | 20  | Give a cautious overall interpretation of results considering objectives, limitations, multiplicity of analyses, results from similar studies, and other relevant evidence                                   | 13-15      |
| Generalisability         | 21  | Discuss the generalisability (external validity) of the study results                                                                                                                                        | 15         |
| <b>Other information</b> |     |                                                                                                                                                                                                              |            |
| Funding                  | 22  | Give the source of funding and the role of the funders for the present study and, if applicable, for the original study on which the present article is based                                                | 17         |

\*Give information separately for cases and controls in case-control studies and, if applicable, for exposed and unexposed groups in cohort and cross-sectional studies.

**Note:** An Explanation and Elaboration article discusses each checklist item and gives methodological background and published examples of transparent reporting. The STROBE checklist is best used in conjunction with this article (freely available on the Web sites of PLoS Medicine at <http://www.plosmedicine.org/>, Annals of Internal Medicine at <http://www.annals.org/>, and Epidemiology at <http://www.epidem.com/>). Information on the STROBE Initiative is available at [www.strobe-statement.org](http://www.strobe-statement.org).
