# Supplementary material for: Measuring health literacy combining performance-based and self-assessed measures: the roles of age, educational level and financial resources in predicting health literacy skills. A cross-sectional study conducted in Florence (Italy)
Source: PubMed Central journal article supplement — BMJ Open. 2020 Oct 5;10(10):e035987. doi: 10.1136/bmjopen-2019-035987 (PMC7537461; doi:10.1136/bmjopen-2019-035987), 2020-10-05
Supplement: bmjopen-2019-035987supp001.pdf [file bmjopen-2019-035987supp001.pdf]

**Table S1.** Percentage of people with regards to the two health literacy measures (HLS-EU-Q16 and NVS) by age class, educational level, and financial resources.

CI= Confidence Interval.

| Variables                                                                                       |                               | HL level                              |                                               |                                                 |                                                      |
|-------------------------------------------------------------------------------------------------|-------------------------------|---------------------------------------|-----------------------------------------------|-------------------------------------------------|------------------------------------------------------|
|                                                                                                 |                               | Raw percentage (95% CI)               |                                               |                                                 |                                                      |
|                                                                                                 |                               | low for both HLS and NVS (concordant) | low for HLS and adequate for NVS (discordant) | sufficient for HLS and low for NVS (discordant) | sufficient for HLS and adequate for NVS (concordant) |
| Age                                                                                             | ≤45                           | 12.2% (4.6–24.8%)                     | 46.9% (32.5–61.7%)                            | 8.2% (2.3–19.6%)                                | 32.7% (19.0–47.5%)                                   |
|                                                                                                 | 46–55                         | 18.9% (9.4–32%)                       | 45.3% (31.6–59.6%)                            | 5.7% (1.2–15.7%)                                | 30.2% (18.3–44.3%)                                   |
|                                                                                                 | 56–65                         | 32.9% (22.3–44.9%)                    | 35.6% (24.7–47.7%)                            | 15.1% (7.8–25.4%)                               | 16.4% (8.8–27.0%)                                    |
|                                                                                                 | >65                           | 54.1% (36.9–70.5%)                    | 24.3% (11.8–41.2%)                            | 13.5% (4.5–28.8%)                               | 8.1% (1.7–21.9%)                                     |
| Educational level                                                                               | Less than high school diploma | 48.7% (32.4–65.2%)                    | 20.5% (9.3–36.5%)                             | 17.9% (7.5–33.5%)                               | 12.8% (4.3–27.4%)                                    |
|                                                                                                 | High school degree            | 33.8% (23.4–45.4%)                    | 46.8% (35.3–58.5%)                            | 9.1% (3.7–17.8%)                                | 10.4% (4.6–19.4%)                                    |
|                                                                                                 | Bachelor's degree and higher  | 15.6% (9–24.5%)                       | 39.6% (29.7–50.1%)                            | 9.4% (4.4–17.1%)                                | 35.4% (25.9–45.8%)                                   |
| Financial resources at disposal from own or family income enough to get to the end of the month | Not enough                    | 70.0% (34.8–93.3%)                    | 20.0% (2.5–55.6%)                             | 10.0% (0.3–44.5%)                               | 0% (0–30.8%)                                         |
|                                                                                                 | Barely enough                 | 32.1% (20.3–40%)                      | 30.4% (18.8–44.1%)                            | 16.1% (7.6–28.3)                                | 21.4% (11.6–34.4%)                                   |
|                                                                                                 | Enough                        | 25.0% (17.2–34.3%)                    | 46.3% (36.7–56.2%)                            | 7.4% (3.3–14.1%)                                | 21.3% (14–30.2%)                                     |
|                                                                                                 | More than enough              | 18.9% (8–35.2%)                       | 35.1% (20.2–52.5%)                            | 13.5% (4.5–28.8%)                               | 32.4% (18–49.8%)                                     |
